# Supplementary material for: Exome-Wide Rare Variant Analysis From the DiscovEHR Study Identifies Novel Candidate Predisposition Genes for Endometrial Cancer
Source: Front Oncol. 2019 Jul 5;9:574. doi: 10.3389/fonc.2019.00574 (PMC6626914; doi:10.3389/fonc.2019.00574)
Supplement: Supplementary file 1 [file Data_Sheet_1.xlsx]

## Sheet: Table1 - case control t.test
Supplementary Table 1. Age, BMI t.test between case and control group in discovery and replication datasets
	Difference of means	Std Error	t-statistic	p-value
Discovery (phase 1)
Age	1.76	0.69	2.54	0.01
BMI	6.1	0.4	15.1	2.86e-50
Replication (phase 2)
Age	4.52	0.91	4.97	7.51e-07
BMI	4.84	0.56	8.61	1.59e-17

## Sheet: Table2 - RBM12 Pdiff
Supplementary Table 2. The Pdiff values for all rare loci in RBM12 gene
Gene	chrpos	Existing_variation	alt_ref	Amino_acids	MAF	Consequence	VEP IMPACT	PolyPhen	Prm	Porig	Prm - Porig
RBM12	20:35655027	rs199582639	T/G	.	0.000327368	upstream_gene_variant	MODIFIER	.	1.37449e-06	6.82e-08	1.30629e-06
RBM12	20:35653254	rs188287954	A/G	.	0.000109123	intron_variant	MODIFIER	.	4.26625e-07	6.82e-08	3.58425e-07
RBM12	20:35654634	rs905877926	A/G	.	0.000109123	upstream_gene_variant	MODIFIER	.	3.97223e-07	6.82e-08	3.29023e-07
RBM12	20:35655323	rs150071988	A/G	.	0.000109505	upstream_gene_variant	MODIFIER	.	3.90197e-07	6.82e-08	3.21997e-07
RBM12	20:35652667	rs747020729&COSM5039294	T/C	.	0.000109123	intron_variant	MODIFIER	.	3.52879e-07	6.82e-08	2.84679e-07
RBM12	20:35654158	.	C/T	.	0.000109123	upstream_gene_variant	MODIFIER	.	3.52092e-07	6.82e-08	2.83892e-07
RBM12	20:35654620	rs777534425	C/T	.	0.000109123	upstream_gene_variant	MODIFIER	.	3.44923e-07	6.82e-08	2.76723e-07
RBM12	20:35654900	.	G/A	.	0.000109123	upstream_gene_variant	MODIFIER	.	2.95865e-07	6.82e-08	2.27665e-07
RBM12	20:35653510	.	GA/G	.	0.000109123	intron_variant	MODIFIER	.	2.80136e-07	6.82e-08	2.11936e-07
RBM12	20:35653511	.	C/T	.	0.000109123	intron_variant	MODIFIER	.	2.80136e-07	6.82e-08	2.11936e-07
RBM12	20:35654765	rs144142577	T/C	.	0.000218245	upstream_gene_variant	MODIFIER	.	2.70392e-07	6.82e-08	2.02192e-07
RBM12	20:35654746	rs200154452	C/T	.	0.000109123	upstream_gene_variant	MODIFIER	.	2.70189e-07	6.82e-08	2.01989e-07
RBM12	20:35652590	.	A/T	.	0.000109123	intron_variant	MODIFIER	.	2.58166e-07	6.82e-08	1.89966e-07
RBM12	20:35652469	.	T/G	.	0.000109123	intron_variant	MODIFIER	.	2.54476e-07	6.82e-08	1.86276e-07
RBM12	20:35658835	.	A/AC	.	0.000109123	upstream_gene_variant	MODIFIER	.	2.32543e-07	6.82e-08	1.64343e-07
RBM12	20:35658837	.	A/AC	.	0.000109123	upstream_gene_variant	MODIFIER	.	2.32543e-07	6.82e-08	1.64343e-07
RBM12	20:35654525	.	A/C	.	0.000109123	upstream_gene_variant	MODIFIER	.	2.27449e-07	6.82e-08	1.59249e-07
RBM12	20:35654486	rs140930448	A/C	.	0.000218245	upstream_gene_variant	MODIFIER	.	1.60606e-07	6.82e-08	9.24063e-08
RBM12	20:35654570	rs376639283	C/A	.	0.000218245	upstream_gene_variant	MODIFIER	.	1.51361e-07	6.82e-08	8.31608e-08
RBM12	20:35653608	rs17092928	C/T	.	0.00130947	5_prime_UTR_variant	MODIFIER	.	1.39507e-07	6.82e-08	7.13065e-08
RBM12	20:35652498	rs981461599	C/T	.	0.000327368	intron_variant	MODIFIER	.	1.28149e-07	6.82e-08	5.99489e-08
RBM12	20:35654853	.	A/G	.	0.000545613	upstream_gene_variant	MODIFIER	.	8.09478e-08	6.82e-08	1.27478e-08
RBM12	20:35652812	.	TGGGCCAGGGCCGGGGCCGGGGCCG/T	.	0.000109314	intron_variant	MODIFIER	.	6.81779e-08	6.82e-08	-2.21137e-11
RBM12	20:35652812	rs569323785	TGGGCCA/T	.	0.000764192	intron_variant	MODIFIER	.	6.81779e-08	6.82e-08	-2.21137e-11
RBM12	20:35658838	.	CACAA/C	.	0.000109146	upstream_gene_variant	MODIFIER	.	6.81779e-08	6.82e-08	-2.21137e-11
RBM12	20:35659092	rs572264472	T/C	.	0.000109146	intron_variant	MODIFIER	.	6.81779e-08	6.82e-08	-2.21137e-11
RBM12	20:35659092	.	G/C	.	0.000109146	intron_variant	MODIFIER	.	6.67654e-08	6.82e-08	-1.43459e-09
RBM12	20:35654637	rs143201084	G/A	.	0.000109123	upstream_gene_variant	MODIFIER	.	6.62889e-08	6.82e-08	-1.91113e-09
RBM12	20:35653054	rs200767497	T/C	.	0.000109123	intron_variant	MODIFIER	.	6.59609e-08	6.82e-08	-2.23908e-09
RBM12	20:35653761	.	C/A	.	0.000109123	5_prime_UTR_variant	MODIFIER	.	6.56756e-08	6.82e-08	-2.5244e-09
RBM12	20:35658838	.	A/C	.	0.000109146	upstream_gene_variant	MODIFIER	.	6.53653e-08	6.82e-08	-2.83469e-09
RBM12	20:35652821	rs369899899	A/G	.	0.000109457	intron_variant	MODIFIER	.	6.536e-08	6.82e-08	-2.83995e-09
RBM12	20:35653289	.	A/AGGCAGTCCTGTGCTG	.	0.000109123	intron_variant	MODIFIER	.	6.53473e-08	6.82e-08	-2.85274e-09
RBM12	20:35654340	rs771722891	T/C	.	0.000109123	upstream_gene_variant	MODIFIER	.	6.52664e-08	6.82e-08	-2.93364e-09
RBM12	20:35652611	.	T/A	.	0.000109123	intron_variant	MODIFIER	.	6.51139e-08	6.82e-08	-3.08609e-09
RBM12	20:35654134	.	T/G	.	0.000109123	upstream_gene_variant	MODIFIER	.	6.49467e-08	6.82e-08	-3.25325e-09
RBM12	20:35654572	.	T/G	.	0.000109123	upstream_gene_variant	MODIFIER	.	6.4872e-08	6.82e-08	-3.32796e-09
RBM12	20:35654938	rs191944725	T/G	.	0.000109123	upstream_gene_variant	MODIFIER	.	6.48088e-08	6.82e-08	-3.39124e-09
RBM12	20:35654405	rs761665005	C/G	.	0.000109123	upstream_gene_variant	MODIFIER	.	6.45919e-08	6.82e-08	-3.60815e-09
RBM12	20:35654342	COSM4634519	C/G	.	0.000109123	upstream_gene_variant	MODIFIER	.	6.45816e-08	6.82e-08	-3.61836e-09
RBM12	20:35654815	rs201755733	C/T	.	0.000109123	upstream_gene_variant	MODIFIER	.	6.4502e-08	6.82e-08	-3.69802e-09
RBM12	20:35652812	rs752461307	C/T	.	0.000109314	intron_variant	MODIFIER	.	6.44752e-08	6.82e-08	-3.72477e-09
RBM12	20:35653600	rs541216065	A/G	.	0.000109123	5_prime_UTR_variant	MODIFIER	.	6.43455e-08	6.82e-08	-3.85448e-09
RBM12	20:35654550	.	A/C	.	0.000109123	upstream_gene_variant	MODIFIER	.	6.43389e-08	6.82e-08	-3.86114e-09
RBM12	20:35654959	.	C/T	.	0.000109123	upstream_gene_variant	MODIFIER	.	6.42483e-08	6.82e-08	-3.95168e-09
RBM12	20:35659053	.	G/GAAACACA	.	0.000109123	intron_variant	MODIFIER	.	6.42356e-08	6.82e-08	-3.96442e-09
RBM12	20:35653200	.	G/A	.	0.000109123	intron_variant	MODIFIER	.	6.40158e-08	6.82e-08	-4.18424e-09
RBM12	20:35653667	rs150600825	C/T	.	0.000109123	5_prime_UTR_variant	MODIFIER	.	6.40033e-08	6.82e-08	-4.1967e-09
RBM12	20:35652877	.	C/G	.	0.000109123	intron_variant	MODIFIER	.	6.39509e-08	6.82e-08	-4.24908e-09
RBM12	20:35653704	rs148065643	C/T	.	0.000109123	5_prime_UTR_variant	MODIFIER	.	6.38094e-08	6.82e-08	-4.39058e-09
RBM12	20:35652823	rs572736637	T/C	.	0.000109457	intron_variant	MODIFIER	.	6.37598e-08	6.82e-08	-4.4402e-09
RBM12	20:35652450	.	G/A	.	0.000109146	intron_variant	MODIFIER	.	6.34389e-08	6.82e-08	-4.76111e-09
RBM12	20:35654548	rs201755475	A/T	.	0.000109123	upstream_gene_variant	MODIFIER	.	6.33435e-08	6.82e-08	-4.85653e-09
RBM12	20:35652624	COSM1026269	T/G	.	0.000109123	intron_variant	MODIFIER	.	6.29107e-08	6.82e-08	-5.28925e-09
RBM12	20:35653255	.	C/CACCAGGCAGTCCTGCACTGGTTATTGCTGA	.	0.000109123	intron_variant	MODIFIER	.	6.25047e-08	6.82e-08	-5.6953e-09
RBM12	20:35654185	.	C/T	.	0.000109123	upstream_gene_variant	MODIFIER	.	6.24924e-08	6.82e-08	-5.70762e-09
RBM12	20:35653359	rs150406619	A/G	.	0.00272807	intron_variant	MODIFIER	.	6.21198e-08	6.82e-08	-6.08022e-09
RBM12	20:35659065	.	A/AAC	.	0.000109123	intron_variant	MODIFIER	.	6.16384e-08	6.82e-08	-6.5616e-09
RBM12	20:35653063	rs142108005	A/T	.	0.000436491	intron_variant	MODIFIER	.	6.00726e-08	6.82e-08	-8.12738e-09
RBM12	20:35654648	rs775334301	C/CGGGGGCACA	.	0.000109123	upstream_gene_variant	MODIFIER	.	5.95947e-08	6.82e-08	-8.60525e-09
RBM12	20:35655063	.	T/C	.	0.000218245	upstream_gene_variant	MODIFIER	.	5.894e-08	6.82e-08	-9.26001e-09
RBM12	20:35654074	rs752561317	C/G	.	0.000218245	upstream_gene_variant	MODIFIER	.	5.87468e-08	6.82e-08	-9.45323e-09
RBM12	20:35654084	rs757398218	T/C	.	0.000109123	upstream_gene_variant	MODIFIER	.	5.86684e-08	6.82e-08	-9.5316e-09
RBM12	20:35653695	rs147392036	C/T	.	0.000109123	5_prime_UTR_variant	MODIFIER	.	5.75864e-08	6.82e-08	-1.06136e-08
RBM12	20:35654738	rs74404345	T/C	.	0.000327368	upstream_gene_variant	MODIFIER	.	5.7371e-08	6.82e-08	-1.0829e-08
RBM12	20:35653892	.	G/C	.	0.000218245	5_prime_UTR_variant	MODIFIER	.	5.72766e-08	6.82e-08	-1.09234e-08
RBM12	20:35653901	rs139156955	A/G	.	0.000109123	5_prime_UTR_variant	MODIFIER	.	5.69776e-08	6.82e-08	-1.12224e-08
RBM12	20:35658834	.	G/C	.	0.000109123	upstream_gene_variant	MODIFIER	.	5.6816e-08	6.82e-08	-1.1384e-08
RBM12	20:35653985	.	A/G	.	0.000327368	upstream_gene_variant	MODIFIER	.	5.62596e-08	6.82e-08	-1.19404e-08
RBM12	20:35653931	rs143803163	G/A	.	0.000109123	upstream_gene_variant	MODIFIER	.	5.53447e-08	6.82e-08	-1.28553e-08
RBM12	20:35652764	rs74880624	C/T	.	0.00665648	intron_variant	MODIFIER	.	5.39118e-08	6.82e-08	-1.42882e-08
RBM12	20:35653732	.	C/T	.	0.000109123	5_prime_UTR_variant	MODIFIER	.	5.16758e-08	6.82e-08	-1.65242e-08
RBM12	20:35659077	rs1035416716	G/C	.	0.000109123	intron_variant	MODIFIER	.	5.14944e-08	6.82e-08	-1.67056e-08
RBM12	20:35654803	rs141540679	C/T	.	0.000109123	upstream_gene_variant	MODIFIER	.	4.75729e-08	6.82e-08	-2.06271e-08
RBM12	20:35652914	rs149878650	T/C	.	0.000654736	intron_variant	MODIFIER	.	4.56844e-08	6.82e-08	-2.25156e-08
RBM12	20:35652825	.	A/G	.	0.000109218	intron_variant	MODIFIER	.	4.47015e-08	6.82e-08	-2.34985e-08
RBM12	20:35653410	rs576704593	G/C	.	0.000327368	intron_variant	MODIFIER	.	4.35003e-08	6.82e-08	-2.46997e-08
RBM12	20:35653402	.	C/T	.	0.000218245	intron_variant	MODIFIER	.	1.49686e-10	6.82e-08	-6.80503e-08

## Sheet: Table3 - NDUFB6 Pdiff
Supplementary Table 3. The Pdiff values for all rare loci in NDUFB6 gene
Gene	chrpos	Existing_variation	alt_ref	Amino_acids	MAF	Consequence	VEP IMPACT	PolyPhen	Prm	Porig	Prm - Porig
NDUFB6	9:32568563	rs7030515	G/A	.	0.000436491	intron_variant	MODIFIER	.	2.0476e-06	1.31e-07	1.9166e-06
NDUFB6	9:32567606	rs60733667	C/T	.	0.000436491	intron_variant	MODIFIER	.	2.0476e-06	1.31e-07	1.9166e-06
NDUFB6	9:32554022	rs56027914	T/C	.	0.000436777	intron_variant	MODIFIER	.	2.04516e-06	1.31e-07	1.91416e-06
NDUFB6	9:32567486	rs12341384	T/C	.	0.000344353	intron_variant	MODIFIER	.	1.31654e-06	1.31e-07	1.18554e-06
NDUFB6	9:32567137	rs746502676	T/C	.	0.000327368	intron_variant	MODIFIER	.	1.25347e-06	1.31e-07	1.12247e-06
NDUFB6	9:32567105	.	G/C	.	0.000109123	intron_variant	MODIFIER	.	4.54872e-07	1.31e-07	3.23872e-07
NDUFB6	9:32559026	.	A/C	.	0.000109433	intron_variant	MODIFIER	.	4.51315e-07	1.31e-07	3.20315e-07
NDUFB6	9:32567223	rs73644989	G/A	.	0.0033828	intron_variant	MODIFIER	.	4.13674e-07	1.31e-07	2.82674e-07
NDUFB6	9:32567560	.	T/G	.	0.000109123	intron_variant	MODIFIER	.	4.13547e-07	1.31e-07	2.82547e-07
NDUFB6	9:32573010	.	T/C	E	0.000109123	synonymous_variant	LOW	.	3.97136e-07	1.31e-07	2.66136e-07
NDUFB6	9:32568234	.	G/T	.	0.000109123	intron_variant	MODIFIER	.	3.92429e-07	1.31e-07	2.61429e-07
NDUFB6	9:32568235	.	A/G	.	0.000109123	intron_variant	MODIFIER	.	3.92429e-07	1.31e-07	2.61429e-07
NDUFB6	9:32568252	rs571832905	A/G	.	0.000109123	intron_variant	MODIFIER	.	3.87562e-07	1.31e-07	2.56562e-07
NDUFB6	9:32568162	.	G/A	.	0.000109123	intron_variant	MODIFIER	.	3.74646e-07	1.31e-07	2.43646e-07
NDUFB6	9:32568705	rs559766954	C/T	.	0.000874126	intron_variant	MODIFIER	.	3.68434e-07	1.31e-07	2.37434e-07
NDUFB6	9:32568635	rs999836105	A/G	.	0.000109123	intron_variant	MODIFIER	.	3.20802e-07	1.31e-07	1.89802e-07
NDUFB6	9:32568232	rs942283520	A/T	.	0.000218245	intron_variant	MODIFIER	.	3.1446e-07	1.31e-07	1.8346e-07
NDUFB6	9:32573043	rs772038892	T/C	P	0.000218245	synonymous_variant	LOW	.	1.91114e-07	1.31e-07	6.01144e-08
NDUFB6	9:32568383	.	C/A	.	0.000109123	intron_variant	MODIFIER	.	1.76674e-07	1.31e-07	4.56744e-08
NDUFB6	9:32568530	rs191497285	G/A	.	0.000109123	intron_variant	MODIFIER	.	1.7383e-07	1.31e-07	4.28299e-08
NDUFB6	9:32568084	rs114924692	T/G	.	0.000654736	intron_variant	MODIFIER	.	1.70765e-07	1.31e-07	3.97648e-08
NDUFB6	9:32567035	rs192891119	A/C	.	0.000109146	intron_variant	MODIFIER	.	1.3981e-07	1.31e-07	8.80955e-09
NDUFB6	9:32567392	.	A/G	.	0.000109529	intron_variant	MODIFIER	.	1.38445e-07	1.31e-07	7.44511e-09
NDUFB6	9:32559026	.	CCCCA/C	.	0.000109433	intron_variant	MODIFIER	.	1.3061e-07	1.31e-07	-3.90161e-10
NDUFB6	9:32567035	rs192891119	T/C	.	0.000109146	intron_variant	MODIFIER	.	1.3061e-07	1.31e-07	-3.90161e-10
NDUFB6	9:32567392	rs536103476	C/G	.	0.00021901	intron_variant	MODIFIER	.	1.3061e-07	1.31e-07	-3.90161e-10
NDUFB6	9:32571101	.	TTGTCCAAAA/T	.	0.000109218	intron_variant	MODIFIER	.	1.3061e-07	1.31e-07	-3.90161e-10
NDUFB6	9:32567647	rs542072142	C/T	.	0.00152772	intron_variant	MODIFIER	.	1.3031e-07	1.31e-07	-6.9043e-10
NDUFB6	9:32567307	rs566250085	T/C	.	0.000109123	intron_variant	MODIFIER	.	1.28318e-07	1.31e-07	-2.68233e-09
NDUFB6	9:32572946	.	C/T	K/E	0.000109123	missense_variant	MODERATE	benign(0.044)	1.25976e-07	1.31e-07	-5.02381e-09
NDUFB6	9:32568468	rs971209871	G/A	.	0.000109123	intron_variant	MODIFIER	.	1.25703e-07	1.31e-07	-5.29737e-09
NDUFB6	9:32567487	rs1014211077	A/G	.	0.000114443	intron_variant	MODIFIER	.	1.25651e-07	1.31e-07	-5.34864e-09
NDUFB6	9:32567567	.	C/T	.	0.000109123	intron_variant	MODIFIER	.	1.25537e-07	1.31e-07	-5.46302e-09
NDUFB6	9:32554027	rs777380669	T/C	.	0.000109242	intron_variant	MODIFIER	.	1.25385e-07	1.31e-07	-5.61502e-09
NDUFB6	9:32573030	.	A/G	R/W	0.000109123	missense_variant	MODERATE	probably_damaging(1)	1.25183e-07	1.31e-07	-5.81703e-09
NDUFB6	9:32568474	.	T/C	.	0.000109123	intron_variant	MODIFIER	.	1.25036e-07	1.31e-07	-5.96444e-09
NDUFB6	9:32567454	rs557313640	A/C	.	0.000114626	intron_variant	MODIFIER	.	1.24708e-07	1.31e-07	-6.29153e-09
NDUFB6	9:32553990	.	C/G	.	0.000109123	intron_variant	MODIFIER	.	1.24665e-07	1.31e-07	-6.33472e-09
NDUFB6	9:32568025	rs535386362	A/G	.	0.000327439	intron_variant	MODIFIER	.	1.2463e-07	1.31e-07	-6.36988e-09
NDUFB6	9:32567808	.	G/C	.	0.000109123	intron_variant	MODIFIER	.	1.23929e-07	1.31e-07	-7.07146e-09
NDUFB6	9:32573068	.	G/C	.	0.000109146	5_prime_UTR_variant	MODIFIER	.	1.23864e-07	1.31e-07	-7.13552e-09
NDUFB6	9:32567896	.	G/A	.	0.000109123	intron_variant	MODIFIER	.	1.23467e-07	1.31e-07	-7.5333e-09
NDUFB6	9:32567718	rs75900711	G/C	.	0.000109123	intron_variant	MODIFIER	.	1.23398e-07	1.31e-07	-7.6016e-09
NDUFB6	9:32559050	.	G/A	.	0.000109601	intron_variant	MODIFIER	.	1.23221e-07	1.31e-07	-7.77869e-09
NDUFB6	9:32567540	.	G/A	.	0.000109337	intron_variant	MODIFIER	.	1.22824e-07	1.31e-07	-8.1759e-09
NDUFB6	9:32558988	rs199796514	A/T	.	0.00010917	intron_variant	MODIFIER	.	1.22792e-07	1.31e-07	-8.20819e-09
NDUFB6	9:32567157	.	T/C	.	0.000109123	intron_variant	MODIFIER	.	1.22526e-07	1.31e-07	-8.47356e-09
NDUFB6	9:32573117	rs887572181	C/T	.	0.000221729	5_prime_UTR_variant	MODIFIER	.	1.2129e-07	1.31e-07	-9.71032e-09
NDUFB6	9:32573079	.	C/G	.	0.000109146	5_prime_UTR_variant	MODIFIER	.	1.2125e-07	1.31e-07	-9.74994e-09
NDUFB6	9:32566975	.	T/C	.	0.00010917	intron_variant	MODIFIER	.	1.21093e-07	1.31e-07	-9.90695e-09
NDUFB6	9:32572958	.	T/G	L/M	0.000109123	missense_variant	MODERATE	probably_damaging(0.999)	1.2099e-07	1.31e-07	-1.00098e-08
NDUFB6	9:32571102	.	TGTCCAAAA/T	.	0.00010917	intron_variant	MODIFIER	.	1.20815e-07	1.31e-07	-1.01847e-08
NDUFB6	9:32567549	.	G/T	.	0.000109194	intron_variant	MODIFIER	.	1.20812e-07	1.31e-07	-1.01879e-08
NDUFB6	9:32568614	rs904205567	A/G	.	0.000109123	intron_variant	MODIFIER	.	1.20686e-07	1.31e-07	-1.03141e-08
NDUFB6	9:32570991	rs148891049	G/A	I/T	0.000109123	missense_variant	MODERATE	possibly_damaging(0.773)	1.20686e-07	1.31e-07	-1.03141e-08
NDUFB6	9:32572963	.	C/G	P/R	0.000109123	missense_variant	MODERATE	benign(0.358)	1.1995e-07	1.31e-07	-1.10501e-08
NDUFB6	9:32573106	rs746858554	C/T	.	0.00010989	5_prime_UTR_variant	MODIFIER	.	1.19876e-07	1.31e-07	-1.11238e-08
NDUFB6	9:32572860	rs749438264	T/C	.	0.000110889	intron_variant	MODIFIER	.	1.1981e-07	1.31e-07	-1.11903e-08
NDUFB6	9:32558836	rs141538344	G/A	.	0.00010989	intron_variant	MODIFIER	.	1.1951e-07	1.31e-07	-1.14905e-08
NDUFB6	9:32572934	rs142741532	C/T	M/V	0.000218245	missense_variant	MODERATE	benign(0.003)	1.19444e-07	1.31e-07	-1.15564e-08
NDUFB6	9:32553909	rs910203911	C/T	P	0.000109123	synonymous_variant	LOW	.	1.19363e-07	1.31e-07	-1.16366e-08
NDUFB6	9:32558964	rs539762948	C/A	.	0.000109146	intron_variant	MODIFIER	.	1.19311e-07	1.31e-07	-1.16895e-08
NDUFB6	9:32567080	.	C/G	.	0.000109123	intron_variant	MODIFIER	.	1.18281e-07	1.31e-07	-1.27193e-08
NDUFB6	9:32567363	.	A/G	.	0.000109146	intron_variant	MODIFIER	.	1.17955e-07	1.31e-07	-1.30449e-08
NDUFB6	9:32568055	rs912282250	G/GA	.	0.000219106	intron_variant	MODIFIER	.	1.17656e-07	1.31e-07	-1.33442e-08
NDUFB6	9:32572891	.	A/C	W/L	0.000109218	missense_variant	MODERATE	possibly_damaging(0.871)	1.17374e-07	1.31e-07	-1.36264e-08
NDUFB6	9:32558872	.	C/CAATA	.	0.000109457	intron_variant	MODIFIER	.	1.17059e-07	1.31e-07	-1.39409e-08
NDUFB6	9:32568201	rs776624066	C/G	.	0.000109123	intron_variant	MODIFIER	.	1.16844e-07	1.31e-07	-1.4156e-08
NDUFB6	9:32567062	rs905564898	A/G	.	0.000109123	intron_variant	MODIFIER	.	1.16807e-07	1.31e-07	-1.41935e-08
NDUFB6	9:32567966	.	G/C	.	0.000109123	intron_variant	MODIFIER	.	1.1636e-07	1.31e-07	-1.46402e-08
NDUFB6	9:32568251	.	T/C	.	0.000109123	intron_variant	MODIFIER	.	1.15728e-07	1.31e-07	-1.52715e-08
NDUFB6	9:32566976	rs865873680	A/G	.	0.00010917	intron_variant	MODIFIER	.	1.15579e-07	1.31e-07	-1.54208e-08
NDUFB6	9:32567762	rs183374959	T/G	.	0.000109123	intron_variant	MODIFIER	.	1.15384e-07	1.31e-07	-1.56156e-08
NDUFB6	9:32558850	.	A/G	.	0.000219491	intron_variant	MODIFIER	.	1.15184e-07	1.31e-07	-1.58165e-08
NDUFB6	9:32567095	rs201078099	T/C	.	0.00120061	intron_variant	MODIFIER	.	1.14917e-07	1.31e-07	-1.60834e-08
NDUFB6	9:32568089	rs749065419	C/T	.	0.000218245	intron_variant	MODIFIER	.	1.14789e-07	1.31e-07	-1.62107e-08
NDUFB6	9:32573093	.	T/C	.	0.000109361	5_prime_UTR_variant	MODIFIER	.	1.14572e-07	1.31e-07	-1.64284e-08
NDUFB6	9:32568331	rs372816123	T/G	.	0.000109123	intron_variant	MODIFIER	.	1.14562e-07	1.31e-07	-1.64382e-08
NDUFB6	9:32567884	.	A/C	.	0.000109123	intron_variant	MODIFIER	.	1.14288e-07	1.31e-07	-1.6712e-08
NDUFB6	9:32567023	.	G/A	.	0.000109123	intron_variant	MODIFIER	.	1.14208e-07	1.31e-07	-1.67922e-08
NDUFB6	9:32568569	.	T/C	.	0.000109123	intron_variant	MODIFIER	.	1.14174e-07	1.31e-07	-1.68264e-08
NDUFB6	9:32571013	rs769852730	A/G	H/Y	0.000109123	missense_variant	MODERATE	benign(0.003)	1.13735e-07	1.31e-07	-1.72649e-08
NDUFB6	9:32568497	rs140972723	T/C	.	0.0393933	intron_variant	MODIFIER	.	1.13403e-07	1.31e-07	-1.75975e-08
NDUFB6	9:32571137	.	C/T	.	0.00010929	intron_variant	MODIFIER	.	1.13364e-07	1.31e-07	-1.7636e-08
NDUFB6	9:32567006	rs747810386	A/G	.	0.000109146	intron_variant	MODIFIER	.	1.13355e-07	1.31e-07	-1.76449e-08
NDUFB6	9:32566980	rs955498069	T/C	.	0.000109123	intron_variant	MODIFIER	.	1.1291e-07	1.31e-07	-1.809e-08
NDUFB6	9:32553937	rs143339409	A/G	T/I	0.000763859	missense_variant	MODERATE	benign(0.005)	1.12397e-07	1.31e-07	-1.86031e-08
NDUFB6	9:32567076	rs770822310	T/C	.	0.000218245	intron_variant	MODIFIER	.	1.11865e-07	1.31e-07	-1.91347e-08
NDUFB6	9:32568588	rs557468799	G/A	.	0.000436491	intron_variant	MODIFIER	.	1.10849e-07	1.31e-07	-2.01508e-08
NDUFB6	9:32567749	.	A/ATAAG	.	0.000109123	intron_variant	MODIFIER	.	1.10703e-07	1.31e-07	-2.02971e-08
NDUFB6	9:32567308	rs778295873	T/G	.	0.000218245	intron_variant	MODIFIER	.	1.08962e-07	1.31e-07	-2.2038e-08
NDUFB6	9:32566970	rs188811399	A/G	.	0.00711471	intron_variant	MODIFIER	.	1.0879e-07	1.31e-07	-2.22097e-08
NDUFB6	9:32558937	.	C/T	I/M	0.000109146	missense_variant	MODERATE	benign(0.116)	1.08353e-07	1.31e-07	-2.26467e-08
NDUFB6	9:32573027	.	T/G	L/M	0.000545732	missense_variant	MODERATE	probably_damaging(0.955)	1.0827e-07	1.31e-07	-2.27296e-08
NDUFB6	9:32567569	.	T/C	.	0.000109123	intron_variant	MODIFIER	.	1.0821e-07	1.31e-07	-2.27901e-08
NDUFB6	9:32568282	.	C/T	.	0.000545613	intron_variant	MODIFIER	.	1.07523e-07	1.31e-07	-2.34771e-08
NDUFB6	9:32572841	.	C/T	.	0.000112918	intron_variant	MODIFIER	.	1.073e-07	1.31e-07	-2.37003e-08
NDUFB6	9:32567869	rs563825664	C/A	.	0.00261894	intron_variant	MODIFIER	.	1.06247e-07	1.31e-07	-2.4753e-08
NDUFB6	9:32572985	rs199895242	C/G	Q/E	0.000436491	missense_variant	MODERATE	probably_damaging(0.987)	1.06061e-07	1.31e-07	-2.4939e-08
NDUFB6	9:32568695	.	C/T	.	0.000109218	intron_variant	MODIFIER	.	1.05883e-07	1.31e-07	-2.51173e-08
NDUFB6	9:32568706	.	A/G	.	0.00010929	intron_variant	MODIFIER	.	1.05881e-07	1.31e-07	-2.51187e-08
NDUFB6	9:32568703	.	C/T	.	0.00010929	intron_variant	MODIFIER	.	1.05881e-07	1.31e-07	-2.51187e-08
NDUFB6	9:32573152	rs747916652	C/G	.	0.000241196	5_prime_UTR_variant	MODIFIER	.	1.05749e-07	1.31e-07	-2.52508e-08
NDUFB6	9:32568498	rs763722693	A/G	.	0.000327368	intron_variant	MODIFIER	.	1.05005e-07	1.31e-07	-2.59947e-08
NDUFB6	9:32567084	.	C/T	.	0.000218245	intron_variant	MODIFIER	.	1.0403e-07	1.31e-07	-2.69697e-08
NDUFB6	9:32567048	rs746479643	A/G	.	0.000436491	intron_variant	MODIFIER	.	1.03776e-07	1.31e-07	-2.72238e-08
NDUFB6	9:32568692	rs951205301	A/G	.	0.000218341	intron_variant	MODIFIER	.	1.03635e-07	1.31e-07	-2.73654e-08
NDUFB6	9:32553884	rs200492335&COSM6306013	A/G	H/Y	0.000545613	missense_variant	MODERATE	possibly_damaging(0.841)	1.02796e-07	1.31e-07	-2.82038e-08
NDUFB6	9:32568421	.	C/G	.	0.000109123	intron_variant	MODIFIER	.	1.01314e-07	1.31e-07	-2.96862e-08
NDUFB6	9:32568102	rs117731167	C/T	.	0.00174596	intron_variant	MODIFIER	.	9.7745e-08	1.31e-07	-3.3255e-08
NDUFB6	9:32568010	rs572570134	G/A	.	0.00196421	intron_variant	MODIFIER	.	8.77381e-08	1.31e-07	-4.32619e-08
NDUFB6	9:32567547	rs950916408	T/A	.	0.000327726	intron_variant	MODIFIER	.	2.72328e-08	1.31e-07	-1.03767e-07
NDUFB6	9:32571107	.	T/G	.	0.000218484	intron_variant	MODIFIER	.	2.09241e-08	1.31e-07	-1.10076e-07
NDUFB6	9:32571108	.	C/CAGAA	.	0.000218484	intron_variant	MODIFIER	.	2.09241e-08	1.31e-07	-1.10076e-07
NDUFB6	9:32571101	rs767705334	T/TTTA	.	0.000218388	intron_variant	MODIFIER	.	4.15044e-09	1.31e-07	-1.2685e-07

## Sheet: Table4 - DLGAP4-AS1 Pdiff
Supplementary Table 4. The Pdiff values for all rare loci in DLGAP4-AS1
Gene	chrpos	Existing_variation	alt_ref	Amino_acids	MAF	Consequence	VEP IMPACT	PolyPhen	Prm	Porig	Prm - Porig
DLGAP4-AS1	20:36525992	rs971669684&COSM5601362&COSM5601361	A/C	P/T	0.000654736	missense_variant	MODERATE	possibly_damaging(0.473)	0.000711443	3.86e-07	0.000711057
DLGAP4-AS1	20:36526041	.	A/G	.	0.000218245	intron_variant	MODIFIER	.	5.37168e-06	3.86e-07	4.98568e-06
DLGAP4-AS1	20:36544832	rs561434861	T/C	.	0.000436491	intron_variant	MODIFIER	.	4.44768e-06	3.86e-07	4.06168e-06
DLGAP4-AS1	20:36549253	.	AC/A	.	0.000875082	3_prime_UTR_variant	MODIFIER	.	2.52041e-06	3.86e-07	2.13441e-06
DLGAP4-AS1	20:36548162	rs7273824&COSM3693464	T/C	N	0.000109123	synonymous_variant	LOW	.	1.41079e-06	3.86e-07	1.02479e-06
DLGAP4-AS1	20:36525987	.	C/A	E/A	0.000109146	missense_variant	MODERATE	benign(0.167)	1.27714e-06	3.86e-07	8.91135e-07
DLGAP4-AS1	20:36525984	.	C/T	V/A	0.000109123	missense_variant	MODERATE	benign(0.003)	1.21209e-06	3.86e-07	8.26092e-07
DLGAP4-AS1	20:36526879	rs114982034&COSM4098029&COSM4098028	A/G	D/N	0.000109123	missense_variant	MODERATE	probably_damaging(0.988)	9.96534e-07	3.86e-07	6.10534e-07
DLGAP4-AS1	20:36524429	.	A/C	.	0.00010917	intron_variant	MODIFIER	.	9.028e-07	3.86e-07	5.168e-07
DLGAP4-AS1	20:36525799	rs563916002	A/G	.	0.000219106	intron_variant	MODIFIER	.	7.20254e-07	3.86e-07	3.34254e-07
DLGAP4-AS1	20:36549275	rs144071876	G/GC	.	0.000327439	3_prime_UTR_variant	MODIFIER	.	6.26122e-07	3.86e-07	2.40122e-07
DLGAP4-AS1	20:36524261	.	T/G	V/F	0.000327368	missense_variant	MODERATE	probably_damaging(0.994)	5.57746e-07	3.86e-07	1.71746e-07
DLGAP4-AS1	20:36549285	rs200649093	A/G	.	0.00229158	3_prime_UTR_variant	MODIFIER	.	5.41329e-07	3.86e-07	1.55329e-07
DLGAP4-AS1	20:36549265	rs761880458	C/T	.	0.000656455	3_prime_UTR_variant	MODIFIER	.	4.91112e-07	3.86e-07	1.05112e-07
DLGAP4-AS1	20:36524272	rs35338208	C/T	A	0.000654736	synonymous_variant	LOW	.	4.63052e-07	3.86e-07	7.7052e-08
DLGAP4-AS1	20:36548049	rs569339141	A/G	E/K	0.000218245	missense_variant	MODERATE	benign(0)	4.62754e-07	3.86e-07	7.67543e-08
DLGAP4-AS1	20:36549264	.	C/CTGACA	.	0.000328084	3_prime_UTR_variant	MODIFIER	.	4.55044e-07	3.86e-07	6.90441e-08
DLGAP4-AS1	20:36545123	rs7270524	G/A	.	0.000873172	intron_variant	MODIFIER	.	4.18372e-07	3.86e-07	3.23725e-08
DLGAP4-AS1	20:36549251	rs538248784	C/CCACCCCAGCCCCCTGA	.	0.00120746	3_prime_UTR_variant	MODIFIER	.	4.10025e-07	3.86e-07	2.40245e-08
DLGAP4-AS1	20:36525952	rs746577914	A/C	L	0.000327368	synonymous_variant	LOW	.	3.95902e-07	3.86e-07	9.90218e-09
DLGAP4-AS1	20:36524168	rs758511076	G/GGGA	.	0.000436586	intron_variant	MODIFIER	.	3.86111e-07	3.86e-07	1.1083e-10
DLGAP4-AS1	20:36549251	rs780006415	CCACCCCAGCCCTCTGA/C	.	0.0029534	3_prime_UTR_variant	MODIFIER	.	3.86111e-07	3.86e-07	1.1083e-10
DLGAP4-AS1	20:36545112	rs201056263	G/A	.	0.000109123	intron_variant	MODIFIER	.	3.80857e-07	3.86e-07	-5.14289e-09
DLGAP4-AS1	20:36524177	rs8118019	C/T	.	0.000109123	intron_variant	MODIFIER	.	3.79254e-07	3.86e-07	-6.74648e-09
DLGAP4-AS1	20:36526938	rs764530553	A/G	A	0.000109123	synonymous_variant	LOW	.	3.79001e-07	3.86e-07	-6.9987e-09
DLGAP4-AS1	20:36547970	rs529378485	C/A	.	0.000109123	intron_variant	MODIFIER	.	3.78385e-07	3.86e-07	-7.61461e-09
DLGAP4-AS1	20:36526877	rs757785334&COSM1172717	A/G	R/H	0.000109123	missense_variant	MODERATE	probably_damaging(0.998)	3.78116e-07	3.86e-07	-7.88401e-09
DLGAP4-AS1	20:36548177	rs779311020	T/C	F	0.000109123	synonymous_variant	LOW	.	3.77665e-07	3.86e-07	-8.33475e-09
DLGAP4-AS1	20:36548163	rs573813643&COSM6250954	A/G	A/T	0.000109123	missense_variant	MODERATE	benign(0.235)	3.74725e-07	3.86e-07	-1.12755e-08
DLGAP4-AS1	20:36549001	.	A/G	.	0.000109123	intron_variant	MODIFIER	.	3.74328e-07	3.86e-07	-1.16722e-08
DLGAP4-AS1	20:36525785	.	A/G	.	0.000109866	intron_variant	MODIFIER	.	3.74202e-07	3.86e-07	-1.17978e-08
DLGAP4-AS1	20:36549229	.	A/G	A/T	0.000109123	missense_variant	MODERATE	benign(0.001)	3.73497e-07	3.86e-07	-1.25035e-08
DLGAP4-AS1	20:36526042	.	T/A	.	0.000109123	intron_variant	MODIFIER	.	3.72538e-07	3.86e-07	-1.34622e-08
DLGAP4-AS1	20:36549049	rs757378572	T/C	.	0.000109123	intron_variant	MODIFIER	.	3.7252e-07	3.86e-07	-1.34798e-08
DLGAP4-AS1	20:36525914	rs528314381	T/C	L	0.000109123	synonymous_variant	LOW	.	3.72162e-07	3.86e-07	-1.38382e-08
DLGAP4-AS1	20:36526061	.	T/TA	.	0.000109218	intron_variant	MODIFIER	.	3.70265e-07	3.86e-07	-1.57353e-08
DLGAP4-AS1	20:36525780	rs893141274	G/T	.	0.000109842	intron_variant	MODIFIER	.	3.69862e-07	3.86e-07	-1.61383e-08
DLGAP4-AS1	20:36526077	rs775228354	A/G	.	0.000109649	intron_variant	MODIFIER	.	3.68865e-07	3.86e-07	-1.71349e-08
DLGAP4-AS1	20:36549017	.	T/G	.	0.000109123	intron_variant	MODIFIER	.	3.68737e-07	3.86e-07	-1.72629e-08
DLGAP4-AS1	20:36526751	rs372832327	A/G	.	0.000218245	intron_variant	MODIFIER	.	3.68283e-07	3.86e-07	-1.77167e-08
DLGAP4-AS1	20:36526065	rs759193970	A/G	.	0.000109314	intron_variant	MODIFIER	.	3.6818e-07	3.86e-07	-1.78204e-08
DLGAP4-AS1	20:36548048	rs773592214	T/C	D	0.000109123	synonymous_variant	LOW	.	3.6776e-07	3.86e-07	-1.82402e-08
DLGAP4-AS1	20:36544914	.	T/C	T	0.000109123	synonymous_variant	LOW	.	3.66987e-07	3.86e-07	-1.9013e-08
DLGAP4-AS1	20:36548080	rs766224371	T/C	P/L	0.000109123	missense_variant	MODERATE	benign(0.051)	3.66944e-07	3.86e-07	-1.90557e-08
DLGAP4-AS1	20:36544850	.	C/T	.	0.00120035	intron_variant	MODIFIER	.	3.66483e-07	3.86e-07	-1.95171e-08
DLGAP4-AS1	20:36526820	.	C/A	K/T	0.000109123	missense_variant	MODERATE	probably_damaging(0.917)	3.65821e-07	3.86e-07	-2.01788e-08
DLGAP4-AS1	20:36526728	.	C/G	.	0.000109146	intron_variant	MODIFIER	.	3.65631e-07	3.86e-07	-2.03686e-08
DLGAP4-AS1	20:36548138	rs11553089	A/G	T	0.000545613	synonymous_variant	LOW	.	3.65611e-07	3.86e-07	-2.03889e-08
DLGAP4-AS1	20:36547933	rs912642136	A/G	.	0.000109123	intron_variant	MODIFIER	.	3.64648e-07	3.86e-07	-2.13515e-08
DLGAP4-AS1	20:36525943	rs147941086&COSM1592595&COSM1026373	T/C	F	0.000109123	synonymous_variant	LOW	.	3.64592e-07	3.86e-07	-2.14085e-08
DLGAP4-AS1	20:36549258	rs1014362532	C/A	.	0.00153106	3_prime_UTR_variant	MODIFIER	.	3.64571e-07	3.86e-07	-2.14287e-08
DLGAP4-AS1	20:36525795	.	A/G	.	0.000109529	intron_variant	MODIFIER	.	3.64292e-07	3.86e-07	-2.17083e-08
DLGAP4-AS1	20:36525826	rs368947812	T/C	.	0.000109123	intron_variant	MODIFIER	.	3.63875e-07	3.86e-07	-2.21248e-08
DLGAP4-AS1	20:36549211	.	T/C	R/C	0.000109123	missense_variant	MODERATE	benign(0.02)	3.63093e-07	3.86e-07	-2.29068e-08
DLGAP4-AS1	20:36526021	.	T/G	.	0.000109123	intron_variant	MODIFIER	.	3.62972e-07	3.86e-07	-2.30284e-08
DLGAP4-AS1	20:36525790	.	C/T	.	0.000109697	intron_variant	MODIFIER	.	3.61245e-07	3.86e-07	-2.47554e-08
DLGAP4-AS1	20:36549280	.	T/C	.	0.000109123	3_prime_UTR_variant	MODIFIER	.	3.61202e-07	3.86e-07	-2.47978e-08
DLGAP4-AS1	20:36526900	rs375335563	A/G	D/N	0.000109123	missense_variant	MODERATE	probably_damaging(0.984)	3.60982e-07	3.86e-07	-2.50178e-08
DLGAP4-AS1	20:36525922	rs772584861&COSM723867&COSM1647392	T/C	I	0.000109123	synonymous_variant	LOW	.	3.59928e-07	3.86e-07	-2.60721e-08
DLGAP4-AS1	20:36526060	rs375837823	G/A	.	0.000218388	intron_variant	MODIFIER	.	3.59681e-07	3.86e-07	-2.63189e-08
DLGAP4-AS1	20:36545106	.	T/C	.	0.000109123	intron_variant	MODIFIER	.	3.58965e-07	3.86e-07	-2.70353e-08
DLGAP4-AS1	20:36527089	.	A/G	.	0.000109123	3_prime_UTR_variant	MODIFIER	.	3.58106e-07	3.86e-07	-2.78944e-08
DLGAP4-AS1	20:36524263	rs751406264	A/C	V	0.000218245	synonymous_variant	LOW	.	3.5741e-07	3.86e-07	-2.85901e-08
DLGAP4-AS1	20:36547977	rs550756659	G/C	.	0.00109123	intron_variant	MODIFIER	.	3.57152e-07	3.86e-07	-2.88484e-08
DLGAP4-AS1	20:36526025	rs186518399	A/G	.	0.000109123	intron_variant	MODIFIER	.	3.57043e-07	3.86e-07	-2.8957e-08
DLGAP4-AS1	20:36526103	rs765380618	T/C	.	0.000112259	intron_variant	MODIFIER	.	3.56171e-07	3.86e-07	-2.98292e-08
DLGAP4-AS1	20:36526756	rs539005340	G/A	.	0.000109123	intron_variant	MODIFIER	.	3.56168e-07	3.86e-07	-2.9832e-08
DLGAP4-AS1	20:36524411	rs116282414	T/C	.	0.000436491	intron_variant	MODIFIER	.	3.52675e-07	3.86e-07	-3.33253e-08
DLGAP4-AS1	20:36525844	rs372737076	T/C	.	0.000109123	splice_region_variant&intron_variant	LOW	.	3.51417e-07	3.86e-07	-3.45825e-08
DLGAP4-AS1	20:36548132	rs149515934	T/C	N	0.000109123	synonymous_variant	LOW	.	3.50674e-07	3.86e-07	-3.53257e-08
DLGAP4-AS1	20:36549087	.	C/T	H	0.000109123	synonymous_variant	LOW	.	3.50235e-07	3.86e-07	-3.57645e-08
DLGAP4-AS1	20:36547996	rs775027220	G/C	.	0.000545613	intron_variant	MODIFIER	.	3.48902e-07	3.86e-07	-3.70984e-08
DLGAP4-AS1	20:36549244	rs775301320	A/G	D/N	0.000109123	missense_variant	MODERATE	possibly_damaging(0.796)	3.48384e-07	3.86e-07	-3.76158e-08
DLGAP4-AS1	20:36525823	.	A/G	.	0.000109123	intron_variant	MODIFIER	.	3.46126e-07	3.86e-07	-3.98736e-08
DLGAP4-AS1	20:36548274	.	T/G	.	0.000218341	intron_variant	MODIFIER	.	3.46053e-07	3.86e-07	-3.99472e-08
DLGAP4-AS1	20:36544791	.	A/C	.	0.000109123	intron_variant	MODIFIER	.	3.45947e-07	3.86e-07	-4.00527e-08
DLGAP4-AS1	20:36527085	rs770520402	A/G	.	0.000327368	3_prime_UTR_variant	MODIFIER	.	3.45903e-07	3.86e-07	-4.00969e-08
DLGAP4-AS1	20:36544965	rs138810228	T/C	D	0.000218245	synonymous_variant	LOW	.	3.44707e-07	3.86e-07	-4.12929e-08
DLGAP4-AS1	20:36549338	rs542693286	A/G	.	0.000218341	3_prime_UTR_variant	MODIFIER	.	3.44622e-07	3.86e-07	-4.13779e-08
DLGAP4-AS1	20:36548205	rs201765595	T/C	.	0.000109123	intron_variant	MODIFIER	.	3.43233e-07	3.86e-07	-4.27675e-08
DLGAP4-AS1	20:36525993	.	A/C	P/H	0.000109123	missense_variant	MODERATE	probably_damaging(0.984)	3.42833e-07	3.86e-07	-4.31671e-08
DLGAP4-AS1	20:36549230	.	T/C	A/V	0.000109123	missense_variant	MODERATE	benign(0.001)	3.41284e-07	3.86e-07	-4.47159e-08
DLGAP4-AS1	20:36545064	.	A/G	S	0.000109123	synonymous_variant	LOW	.	3.41284e-07	3.86e-07	-4.47159e-08
DLGAP4-AS1	20:36549024	.	A/G	.	0.000109123	intron_variant	MODIFIER	.	3.38308e-07	3.86e-07	-4.7692e-08
DLGAP4-AS1	20:36525797	.	T/G	.	0.000109505	intron_variant	MODIFIER	.	3.3785e-07	3.86e-07	-4.81496e-08
DLGAP4-AS1	20:36548009	rs906952889	G/C	.	0.000218245	intron_variant	MODIFIER	.	3.3662e-07	3.86e-07	-4.93804e-08
DLGAP4-AS1	20:36548174	.	T/C	C	0.000109123	synonymous_variant	LOW	.	3.3617e-07	3.86e-07	-4.98297e-08
DLGAP4-AS1	20:36548201	.	A/G	.	0.000109123	splice_region_variant&intron_variant	LOW	.	3.3617e-07	3.86e-07	-4.98297e-08
DLGAP4-AS1	20:36549269	rs765203728	C/A	.	0.000109194	3_prime_UTR_variant	MODIFIER	.	3.36134e-07	3.86e-07	-4.98658e-08
DLGAP4-AS1	20:36525818	rs757431060	C/A	.	0.000327511	intron_variant	MODIFIER	.	3.35579e-07	3.86e-07	-5.0421e-08
DLGAP4-AS1	20:36548246	.	A/C	.	0.000109123	intron_variant	MODIFIER	.	3.34213e-07	3.86e-07	-5.17868e-08
DLGAP4-AS1	20:36524317	rs772350950&COSM1238684	T/C	F	0.000436491	synonymous_variant	LOW	.	3.33023e-07	3.86e-07	-5.29768e-08
DLGAP4-AS1	20:36545155	.	A/C	.	0.000109266	intron_variant	MODIFIER	.	3.32266e-07	3.86e-07	-5.37344e-08
DLGAP4-AS1	20:36544845	.	C/A	.	0.00316525	intron_variant	MODIFIER	.	3.28879e-07	3.86e-07	-5.71205e-08
DLGAP4-AS1	20:36526954	.	G/T	S/A	0.000218245	missense_variant	MODERATE	probably_damaging(0.997)	3.23362e-07	3.86e-07	-6.26381e-08
DLGAP4-AS1	20:36525869	rs769094888&COSM6370053&COSM6370052&COSM3840896&COSM3840895	T/C	R/C	0.000218245	missense_variant	MODERATE	benign(0.171)	3.20404e-07	3.86e-07	-6.55957e-08
DLGAP4-AS1	20:36549259	.	A/G	.	0.00043735	3_prime_UTR_variant	MODIFIER	.	3.18291e-07	3.86e-07	-6.7709e-08
DLGAP4-AS1	20:36527048	.	AGAAAC/A	.	0.000109123	3_prime_UTR_variant	MODIFIER	.	3.00453e-07	3.86e-07	-8.55467e-08
DLGAP4-AS1	20:36524168	.	A/G	.	0.000109218	intron_variant	MODIFIER	.	2.65009e-07	3.86e-07	-1.20991e-07
DLGAP4-AS1	20:36548078	rs533129900&COSM3545872	T/C	A	0.000218245	synonymous_variant	LOW	.	1.37184e-07	3.86e-07	-2.48816e-07

## Sheet: Table5 - ATP6V1A Pdiff
Supplementary Table 5. The Pdiff values for all rare loci in ATP6V1A gene
Gene	chrpos	Existing_variation	alt_ref	Amino_acids	MAF	Consequence	VEP IMPACT	PolyPhen	Prm	Porig	Prm - Porig
ATP6V1A	3:113805555	rs200858422	C/T	.	0.00381929	intron_variant	MODIFIER	.	1.07317e-05	5e-07	1.02317e-05
ATP6V1A	3:113778700	rs144422977	A/G	.	0.000218293	intron_variant	MODIFIER	.	5.90773e-06	5e-07	5.40773e-06
ATP6V1A	3:113795142	rs373543610	C/A	R	0.000218245	synonymous_variant	LOW	.	3.63939e-06	5e-07	3.13939e-06
ATP6V1A	3:113788951	rs534715474	A/G	.	0.000656168	intron_variant	MODIFIER	.	3.58697e-06	5e-07	3.08697e-06
ATP6V1A	3:113803738	rs563120471	A/G	.	0.000436872	intron_variant	MODIFIER	.	3.42162e-06	5e-07	2.92162e-06
ATP6V1A	3:113803685	.	G/A	.	0.000109123	splice_region_variant&intron_variant	LOW	.	1.54698e-06	5e-07	1.04698e-06
ATP6V1A	3:113809282	rs141038991	A/G	.	0.000109123	intron_variant	MODIFIER	.	1.4928e-06	5e-07	9.92802e-07
ATP6V1A	3:113798472	rs144859721	C/T	.	0.000109123	intron_variant	MODIFIER	.	1.4928e-06	5e-07	9.92802e-07
ATP6V1A	3:113778923	rs568037843	G/T	.	0.000109146	intron_variant	MODIFIER	.	1.49275e-06	5e-07	9.92751e-07
ATP6V1A	3:113805363	rs753274046	G/A	P	0.000109123	synonymous_variant	LOW	.	1.36147e-06	5e-07	8.61466e-07
ATP6V1A	3:113784792	.	G/A	T/A	0.000109146	missense_variant	MODERATE	benign(0.103)	1.35474e-06	5e-07	8.54744e-07
ATP6V1A	3:113798422	rs112729133	G/A	A	0.000218245	synonymous_variant	LOW	.	1.29421e-06	5e-07	7.94213e-07
ATP6V1A	3:113784915	.	G/A	.	0.000109481	intron_variant	MODIFIER	.	1.28005e-06	5e-07	7.80046e-07
ATP6V1A	3:113789691	.	G/C	.	0.000109123	intron_variant	MODIFIER	.	1.20495e-06	5e-07	7.04946e-07
ATP6V1A	3:113795187	rs771311957&COSM4583806&COSM1036559	C/T	S	0.000218245	synonymous_variant	LOW	.	1.10537e-06	5e-07	6.05374e-07
ATP6V1A	3:113798208	.	G/A	.	0.000109123	intron_variant	MODIFIER	.	1.01839e-06	5e-07	5.18385e-07
ATP6V1A	3:113794795	.	A/G	.	0.000109938	intron_variant	MODIFIER	.	8.3957e-07	5e-07	3.3957e-07
ATP6V1A	3:113778655	rs749809204	A/G	.	0.000764192	intron_variant	MODIFIER	.	6.19293e-07	5e-07	1.19293e-07
ATP6V1A	3:113798510	rs575120642	A/T	.	0.000436491	intron_variant	MODIFIER	.	6.16151e-07	5e-07	1.16151e-07
ATP6V1A	3:113786484	.	C/A	.	0.00220946	intron_variant	MODIFIER	.	6.11031e-07	5e-07	1.11031e-07
ATP6V1A	3:113805419	rs768704096	C/G	R/P	0.00130976	missense_variant	MODERATE	possibly_damaging(0.841)	4.99758e-07	5e-07	-2.42429e-10
ATP6V1A	3:113803724	rs375840054	A/G	.	0.000109123	intron_variant	MODIFIER	.	4.9161e-07	5e-07	-8.38953e-09
ATP6V1A	3:113796013	rs111497050	G/C	.	0.000109123	intron_variant	MODIFIER	.	4.88703e-07	5e-07	-1.12972e-08
ATP6V1A	3:113788636	.	G/A	.	0.000218245	intron_variant	MODIFIER	.	4.82592e-07	5e-07	-1.74079e-08
ATP6V1A	3:113784671	rs781198967	C/A	.	0.000109123	intron_variant	MODIFIER	.	4.81952e-07	5e-07	-1.80477e-08
ATP6V1A	3:113781010	rs936381879	G/A	.	0.000109123	intron_variant	MODIFIER	.	4.806e-07	5e-07	-1.94e-08
ATP6V1A	3:113786161	rs960013066	T/G	.	0.000109123	intron_variant	MODIFIER	.	4.80588e-07	5e-07	-1.94124e-08
ATP6V1A	3:113784684	rs775765057	G/A	.	0.00010917	intron_variant	MODIFIER	.	4.79904e-07	5e-07	-2.00958e-08
ATP6V1A	3:113803542	.	G/A	.	0.000109146	intron_variant	MODIFIER	.	4.77736e-07	5e-07	-2.22643e-08
ATP6V1A	3:113805419	rs768704096	A/G	R/H	0.000109409	missense_variant	MODERATE	possibly_damaging(0.767)	4.76591e-07	5e-07	-2.34092e-08
ATP6V1A	3:113786162	.	T/G	.	0.000109123	intron_variant	MODIFIER	.	4.76012e-07	5e-07	-2.39882e-08
ATP6V1A	3:113788972	rs546576090	A/T	.	0.000109481	intron_variant	MODIFIER	.	4.75549e-07	5e-07	-2.44515e-08
ATP6V1A	3:113809430	rs774474864	A/G	.	0.000109123	3_prime_UTR_variant	MODIFIER	.	4.73409e-07	5e-07	-2.65907e-08
ATP6V1A	3:113784246	.	C/T	P	0.000109123	synonymous_variant	LOW	.	4.72949e-07	5e-07	-2.70514e-08
ATP6V1A	3:113784382	rs749209409	A/G	V/M	0.000109123	missense_variant	MODERATE	possibly_damaging(0.486)	4.72842e-07	5e-07	-2.71577e-08
ATP6V1A	3:113781150	.	A/G	M/I	0.000109123	missense_variant	MODERATE	benign(0.039)	4.72619e-07	5e-07	-2.73806e-08
ATP6V1A	3:113803769	.	G/A	.	0.000109337	intron_variant	MODIFIER	.	4.72415e-07	5e-07	-2.75854e-08
ATP6V1A	3:113805303	rs762687129	T/C	.	0.000109146	intron_variant	MODIFIER	.	4.7193e-07	5e-07	-2.80698e-08
ATP6V1A	3:113789833	.	C/T	I	0.000109123	synonymous_variant	LOW	.	4.71892e-07	5e-07	-2.8108e-08
ATP6V1A	3:113784634	rs533496293	G/A	.	0.00010917	intron_variant	MODIFIER	.	4.71278e-07	5e-07	-2.87218e-08
ATP6V1A	3:113805579	rs150760445	A/T	.	0.000446828	intron_variant	MODIFIER	.	4.70326e-07	5e-07	-2.9674e-08
ATP6V1A	3:113803773	.	T/G	.	0.000109314	intron_variant	MODIFIER	.	4.70222e-07	5e-07	-2.97779e-08
ATP6V1A	3:113805469	COSM4930959	G/A	I/V	0.000109123	missense_variant	MODERATE	benign(0)	4.69705e-07	5e-07	-3.02954e-08
ATP6V1A	3:113795289	rs185325031	A/G	.	0.000109481	intron_variant	MODIFIER	.	4.69228e-07	5e-07	-3.07725e-08
ATP6V1A	3:113778906	rs190971499	G/A	.	0.000109146	intron_variant	MODIFIER	.	4.68353e-07	5e-07	-3.16473e-08
ATP6V1A	3:113794829	.	C/T	.	0.000218293	intron_variant	MODIFIER	.	4.68118e-07	5e-07	-3.1882e-08
ATP6V1A	3:113786133	rs753248635	G/A	.	0.000109123	intron_variant	MODIFIER	.	4.67096e-07	5e-07	-3.29036e-08
ATP6V1A	3:113789809	rs140941251	G/T	P	0.000109123	synonymous_variant	LOW	.	4.65224e-07	5e-07	-3.47758e-08
ATP6V1A	3:113795130	rs778910556&COSM5037373	A/G	S	0.000109123	synonymous_variant	LOW	.	4.64851e-07	5e-07	-3.5149e-08
ATP6V1A	3:113798532	.	C/T	.	0.000109194	intron_variant	MODIFIER	.	4.64159e-07	5e-07	-3.58415e-08
ATP6V1A	3:113781111	rs755432094	T/C	S	0.000109123	synonymous_variant	LOW	.	4.63892e-07	5e-07	-3.61081e-08
ATP6V1A	3:113809294	rs181305678	G/A	.	0.000109123	intron_variant	MODIFIER	.	4.62609e-07	5e-07	-3.73911e-08
ATP6V1A	3:113795865	rs780039870	C/T	.	0.000109123	intron_variant	MODIFIER	.	4.61978e-07	5e-07	-3.80224e-08
ATP6V1A	3:113788841	.	G/A	N/S	0.000109123	missense_variant	MODERATE	benign(0.395)	4.60956e-07	5e-07	-3.90439e-08
ATP6V1A	3:113798230	rs747074429	G/T	.	0.000109123	intron_variant	MODIFIER	.	4.59802e-07	5e-07	-4.01985e-08
ATP6V1A	3:113795043	rs761025920	A/G	.	0.000109123	intron_variant	MODIFIER	.	4.58879e-07	5e-07	-4.11212e-08
ATP6V1A	3:113796010	rs893339753	A/G	.	0.000109123	intron_variant	MODIFIER	.	4.58841e-07	5e-07	-4.1159e-08
ATP6V1A	3:113786209	rs540339915	G/A	.	0.000109123	intron_variant	MODIFIER	.	4.54323e-07	5e-07	-4.56766e-08
ATP6V1A	3:113788644	rs916583077	T/C	.	0.000109123	intron_variant	MODIFIER	.	4.53857e-07	5e-07	-4.61426e-08
ATP6V1A	3:113788631	rs760735578	C/G	.	0.000109123	intron_variant	MODIFIER	.	4.52704e-07	5e-07	-4.72956e-08
ATP6V1A	3:113795933	rs370231379	T/C	I	0.000218245	synonymous_variant	LOW	.	4.522e-07	5e-07	-4.77999e-08
ATP6V1A	3:113798156	.	C/A	.	0.000109123	intron_variant	MODIFIER	.	4.51957e-07	5e-07	-4.80434e-08
ATP6V1A	3:113789901	rs781123601	G/A	.	0.000109433	intron_variant	MODIFIER	.	4.51577e-07	5e-07	-4.84226e-08
ATP6V1A	3:113798368	rs753550267&COSM177264	T/C	F	0.000218245	synonymous_variant	LOW	.	4.50993e-07	5e-07	-4.90068e-08
ATP6V1A	3:113798190	.	C/CTT	.	0.000109123	intron_variant	MODIFIER	.	4.50871e-07	5e-07	-4.9129e-08
ATP6V1A	3:113786160	rs572861496	A/G	.	0.00130947	intron_variant	MODIFIER	.	4.50274e-07	5e-07	-4.97265e-08
ATP6V1A	3:113781266	rs2712356	A/C	.	0.000658183	intron_variant	MODIFIER	.	4.50024e-07	5e-07	-4.9976e-08
ATP6V1A	3:113809446	rs766740005	T/C	.	0.000109123	3_prime_UTR_variant	MODIFIER	.	4.47586e-07	5e-07	-5.24143e-08
ATP6V1A	3:113794857	.	C/T	.	0.000109123	intron_variant	MODIFIER	.	4.46539e-07	5e-07	-5.34605e-08
ATP6V1A	3:113795943	.	C/T	.	0.000109123	splice_region_variant&intron_variant	LOW	.	4.45631e-07	5e-07	-5.4369e-08
ATP6V1A	3:113788629	rs773323843	A/G	.	0.000109123	intron_variant	MODIFIER	.	4.43478e-07	5e-07	-5.65222e-08
ATP6V1A	3:113803501	.	G/A	.	0.00010917	intron_variant	MODIFIER	.	4.43345e-07	5e-07	-5.66549e-08
ATP6V1A	3:113796023	.	T/C	.	0.000109123	intron_variant	MODIFIER	.	4.38129e-07	5e-07	-6.18708e-08
ATP6V1A	3:113795007	rs372421060	G/A	.	0.000327368	intron_variant	MODIFIER	.	4.36885e-07	5e-07	-6.31146e-08
ATP6V1A	3:113795936	rs187593867	C/T	V	0.000654736	synonymous_variant	LOW	.	4.36606e-07	5e-07	-6.3394e-08
ATP6V1A	3:113784330	rs753216033	A/G	L	0.000109123	synonymous_variant	LOW	.	4.36353e-07	5e-07	-6.36468e-08
ATP6V1A	3:113795005	rs201044927	T/G	.	0.000218245	intron_variant	MODIFIER	.	4.35654e-07	5e-07	-6.43455e-08
ATP6V1A	3:113786227	rs373290404	G/T	.	0.000218245	splice_region_variant&intron_variant	LOW	.	4.35427e-07	5e-07	-6.4573e-08
ATP6V1A	3:113788688	rs141858455	TC/T	.	0.000654736	intron_variant	MODIFIER	.	4.3529e-07	5e-07	-6.47105e-08
ATP6V1A	3:113789872	rs186757281	T/C	.	0.00294889	intron_variant	MODIFIER	.	4.33332e-07	5e-07	-6.66676e-08
ATP6V1A	3:113784909	rs1043100238	G/GTAAT	.	0.000109409	intron_variant	MODIFIER	.	4.32974e-07	5e-07	-6.70263e-08
ATP6V1A	3:113784333	rs145564764&COSM309371&COSM1036554	A/G	S	0.000327368	synonymous_variant	LOW	.	4.32093e-07	5e-07	-6.79074e-08
ATP6V1A	3:113805578	rs547136777	CT/C	.	0.000454442	intron_variant	MODIFIER	.	4.31777e-07	5e-07	-6.82227e-08
ATP6V1A	3:113795207	.	G/A	.	0.000218245	splice_region_variant&intron_variant	LOW	.	4.31092e-07	5e-07	-6.89078e-08
ATP6V1A	3:113788640	rs752641860	T/C	.	0.000327368	intron_variant	MODIFIER	.	4.31076e-07	5e-07	-6.89241e-08
ATP6V1A	3:113794838	rs998985179	G/A	.	0.000109146	intron_variant	MODIFIER	.	4.30841e-07	5e-07	-6.91589e-08
ATP6V1A	3:113809307	rs762376921	A/G	.	0.000109123	intron_variant	MODIFIER	.	4.29151e-07	5e-07	-7.08491e-08
ATP6V1A	3:113798158	rs746964633	G/A	.	0.000218245	intron_variant	MODIFIER	.	4.29023e-07	5e-07	-7.09769e-08
ATP6V1A	3:113784422	rs142398138	T/C	P/L	0.000545613	missense_variant	MODERATE	possibly_damaging(0.761)	4.28841e-07	5e-07	-7.11595e-08
ATP6V1A	3:113778933	rs774671091	C/T	.	0.000109146	intron_variant	MODIFIER	.	4.28172e-07	5e-07	-7.18284e-08
ATP6V1A	3:113809364	rs149804500	A/C	I	0.000218245	synonymous_variant	LOW	.	4.27382e-07	5e-07	-7.26176e-08
ATP6V1A	3:113778935	.	A/C	.	0.000327511	intron_variant	MODIFIER	.	4.24373e-07	5e-07	-7.5627e-08
ATP6V1A	3:113784216	.	A/G	.	0.000109123	splice_region_variant&intron_variant	LOW	.	4.24036e-07	5e-07	-7.59641e-08
ATP6V1A	3:113809477	rs764851502	C/T	.	0.000109123	3_prime_UTR_variant	MODIFIER	.	4.1924e-07	5e-07	-8.07598e-08
ATP6V1A	3:113788638	rs374846803	T/C	.	0.00534701	intron_variant	MODIFIER	.	4.16703e-07	5e-07	-8.32968e-08
ATP6V1A	3:113789670	.	A/T	.	0.000327439	intron_variant	MODIFIER	.	4.15469e-07	5e-07	-8.45312e-08
ATP6V1A	3:113809431	rs80048233	T/C	.	0.000763859	3_prime_UTR_variant	MODIFIER	.	4.1474e-07	5e-07	-8.52598e-08
ATP6V1A	3:113803746	rs376415408	T/TAAA	.	0.000764526	intron_variant	MODIFIER	.	4.14738e-07	5e-07	-8.52622e-08
ATP6V1A	3:113784677	.	A/C	.	0.000218293	intron_variant	MODIFIER	.	4.13376e-07	5e-07	-8.66236e-08
ATP6V1A	3:113805267	rs191478929	G/A	.	0.00327869	intron_variant	MODIFIER	.	4.1287e-07	5e-07	-8.71305e-08
ATP6V1A	3:113805530	rs748763174	T/A	.	0.000109123	splice_region_variant&intron_variant	LOW	.	4.08321e-07	5e-07	-9.1679e-08
ATP6V1A	3:113803555	rs201421967	A/T	.	0.000218293	intron_variant	MODIFIER	.	4.06092e-07	5e-07	-9.39082e-08
ATP6V1A	3:113778782	rs781640990	G/T	L/R	0.000109123	missense_variant	MODERATE	benign(0)	4.04935e-07	5e-07	-9.50653e-08
ATP6V1A	3:113786225	.	G/T	.	0.000327368	splice_region_variant&intron_variant	LOW	.	3.87152e-07	5e-07	-1.12848e-07
ATP6V1A	3:113786428	.	G/A	.	0.000109123	intron_variant	MODIFIER	.	3.86632e-07	5e-07	-1.13368e-07
ATP6V1A	3:113786415	.	G/T	.	0.000109123	intron_variant	MODIFIER	.	3.827e-07	5e-07	-1.173e-07
ATP6V1A	3:113789664	.	A/G	.	0.0016397	intron_variant	MODIFIER	.	3.82341e-07	5e-07	-1.17659e-07
ATP6V1A	3:113778715	.	C/CTTATTTA	.	0.000109123	intron_variant	MODIFIER	.	3.67762e-07	5e-07	-1.32238e-07
ATP6V1A	3:113803764	rs535189332	A/C	.	0.00404725	intron_variant	MODIFIER	.	3.61686e-07	5e-07	-1.38314e-07
ATP6V1A	3:113798375	rs754996622	T/C	L	0.000109123	synonymous_variant	LOW	.	3.61142e-07	5e-07	-1.38858e-07
ATP6V1A	3:113798181	rs200783945	A/AT	.	0.000327368	intron_variant	MODIFIER	.	1.75378e-07	5e-07	-3.24622e-07
ATP6V1A	3:113780976	rs16861331	C/T	.	0.000327368	intron_variant	MODIFIER	.	1.75378e-07	5e-07	-3.24622e-07
ATP6V1A	3:113795838	rs3217358	C/CA	.	0.000218388	intron_variant	MODIFIER	.	1.12399e-07	5e-07	-3.87601e-07
ATP6V1A	3:113789716	rs142893861	C/T	.	0.000218293	intron_variant	MODIFIER	.	1.12399e-07	5e-07	-3.87601e-07
ATP6V1A	3:113788902	rs146162142	G/C	.	0.000218293	intron_variant	MODIFIER	.	1.12399e-07	5e-07	-3.87601e-07

## Sheet: Table6 - RECK Pdiff
Supplementary Table 6. The Pdiff values for all rare loci in RECK gene
Gene	chrpos	Existing_variation	alt_ref	Amino_acids	MAF	Consequence	VEP IMPACT	PolyPhen	Prm	Porig	Prm - Porig
RECK	9:36088036	rs41302061	A/G	.	0.00130976	intron_variant	MODIFIER	.	9.78237e-06	1.86e-06	7.92237e-06
RECK	9:36065721	rs78998877	G/A	.	0.00133304	intron_variant	MODIFIER	.	8.36266e-06	1.86e-06	6.50266e-06
RECK	9:36109923	rs372299298	T/A	.	0.000218245	intron_variant	MODIFIER	.	6.38069e-06	1.86e-06	4.52069e-06
RECK	9:36063892	rs16932881	C/T	.	0.00141859	intron_variant	MODIFIER	.	6.35299e-06	1.86e-06	4.49299e-06
RECK	9:36117183	rs188160177	A/G	.	0.000327368	splice_region_variant&intron_variant	LOW	.	6.01184e-06	1.86e-06	4.15184e-06
RECK	9:36083487	rs754745207&COSM1177811	A/G	A/T	0.000109123	missense_variant	MODERATE	benign(0.178)	3.15478e-06	1.86e-06	1.29478e-06
RECK	9:36122732	rs565159796	T/C	.	0.000109123	intron_variant	MODIFIER	.	2.99844e-06	1.86e-06	1.13844e-06
RECK	9:36037075	.	G/GGGGCCTGGCTC	GGLAP/GX	0.000109123	frameshift_variant	HIGH	.	2.98253e-06	1.86e-06	1.12253e-06
RECK	9:36087640	.	C/T	.	0.000109123	intron_variant	MODIFIER	.	2.90712e-06	1.86e-06	1.04712e-06
RECK	9:36117172	rs140337764	C/T	C/R	0.000218245	missense_variant	MODERATE	probably_damaging(0.977)	2.89441e-06	1.86e-06	1.03441e-06
RECK	9:36118831	rs147027096	A/G	S	0.000109123	synonymous_variant	LOW	.	2.8659e-06	1.86e-06	1.0059e-06
RECK	9:36100583	rs181427425	T/C	.	0.000109194	intron_variant	MODIFIER	.	2.79388e-06	1.86e-06	9.33885e-07
RECK	9:36087746	rs1034697394	A/G	K	0.000109123	synonymous_variant	LOW	.	2.77872e-06	1.86e-06	9.18721e-07
RECK	9:36102075	rs74372001	T/C	.	0.00130947	intron_variant	MODIFIER	.	2.72767e-06	1.86e-06	8.67672e-07
RECK	9:36102278	rs75300380	G/C	.	0.00130947	intron_variant	MODIFIER	.	2.72767e-06	1.86e-06	8.67672e-07
RECK	9:36036923	rs905601158	T/C	.	0.000111012	5_prime_UTR_variant	MODIFIER	.	2.72306e-06	1.86e-06	8.63059e-07
RECK	9:36112408	.	A/T	H/Q	0.000218245	missense_variant	MODERATE	benign(0.139)	2.67349e-06	1.86e-06	8.13485e-07
RECK	9:36118904	rs763992953	A/G	E/K	0.000218245	missense_variant	MODERATE	benign(0.178)	2.4994e-06	1.86e-06	6.39399e-07
RECK	9:36116974	rs16932947	A/G	.	0.00141859	intron_variant	MODIFIER	.	2.47014e-06	1.86e-06	6.1014e-07
RECK	9:36112225	rs555179643	T/C	.	0.000654736	intron_variant	MODIFIER	.	2.43112e-06	1.86e-06	5.71124e-07
RECK	9:36120676	rs558651718	G/A	P	0.000218245	synonymous_variant	LOW	.	2.35567e-06	1.86e-06	4.95672e-07
RECK	9:36083610	rs149182852	A/G	.	0.000545732	intron_variant	MODIFIER	.	2.31528e-06	1.86e-06	4.5528e-07
RECK	9:36110029	rs772507584&COSM1462342	C/G	R/P	0.000109123	missense_variant	MODERATE	probably_damaging(0.916)	2.3021e-06	1.86e-06	4.42098e-07
RECK	9:36118780	.	T/C	P	0.000327368	synonymous_variant	LOW	.	2.24765e-06	1.86e-06	3.87654e-07
RECK	9:36036920	.	CGGCGGCGGT/C	.	0.00246803	5_prime_UTR_variant	MODIFIER	.	2.2035e-06	1.86e-06	3.43499e-07
RECK	9:36037021	rs557893747	C/T	L/P	0.000546329	missense_variant	MODERATE	benign(0)	2.13239e-06	1.86e-06	2.72386e-07
RECK	9:36058817	.	T/TG	.	0.000545852	intron_variant	MODIFIER	.	2.07813e-06	1.86e-06	2.18134e-07
RECK	9:36117254	rs145287956	A/G	.	0.000546209	intron_variant	MODIFIER	.	2.06956e-06	1.86e-06	2.09558e-07
RECK	9:36058749	rs541382370	C/CTAGAGGATAATAAGT	.	0.000439657	intron_variant	MODIFIER	.	2.02434e-06	1.86e-06	1.64337e-07
RECK	9:36109901	rs116454353	A/G	.	0.000545613	intron_variant	MODIFIER	.	1.98389e-06	1.86e-06	1.23886e-07
RECK	9:36123054	rs111613206	A/G	.	0.000654736	3_prime_UTR_variant	MODIFIER	.	1.95201e-06	1.86e-06	9.20106e-08
RECK	9:36037047	rs139893051	A/G	A/T	0.000655165	missense_variant	MODERATE	benign(0)	1.94208e-06	1.86e-06	8.2076e-08
RECK	9:36121481	rs146769848	CA/C	.	0.000547405	intron_variant	MODIFIER	.	1.9359e-06	1.86e-06	7.58957e-08
RECK	9:36109910	rs368769614	C/T	.	0.000545613	intron_variant	MODIFIER	.	1.91583e-06	1.86e-06	5.58322e-08
RECK	9:36122892	rs570150108	A/G	A	0.000218245	synonymous_variant	LOW	.	1.89827e-06	1.86e-06	3.8271e-08
RECK	9:36118737	rs368364486	A/T	.	0.000437445	intron_variant	MODIFIER	.	1.89626e-06	1.86e-06	3.62619e-08
RECK	9:36100294	rs200345302	G/T	.	0.0024007	intron_variant	MODIFIER	.	1.87171e-06	1.86e-06	1.17136e-08
RECK	9:36036936	rs143148105	T/G	.	0.00808954	5_prime_UTR_variant	MODIFIER	.	1.85976e-06	1.86e-06	-2.39835e-10
RECK	9:36123132	rs7042392	G/T	.	0.00120061	3_prime_UTR_variant	MODIFIER	.	1.85976e-06	1.86e-06	-2.39835e-10
RECK	9:36121652	rs139816613	A/G	L	0.000109123	synonymous_variant	LOW	.	1.84795e-06	1.86e-06	-1.20496e-08
RECK	9:36087911	rs139106894	T/C	L	0.000109123	synonymous_variant	LOW	.	1.8339e-06	1.86e-06	-2.60994e-08
RECK	9:36121498	rs565423537	CT/C	.	0.000655165	intron_variant	MODIFIER	.	1.83104e-06	1.86e-06	-2.89567e-08
RECK	9:36105364	rs541679661	G/A	.	0.000109146	intron_variant	MODIFIER	.	1.83091e-06	1.86e-06	-2.90893e-08
RECK	9:36063795	.	A/G	G/D	0.000109123	missense_variant&splice_region_variant	MODERATE	benign(0.125)	1.82712e-06	1.86e-06	-3.28783e-08
RECK	9:36120658	.	A/T	.	0.000109123	splice_region_variant&intron_variant	LOW	.	1.82613e-06	1.86e-06	-3.387e-08
RECK	9:36036946	rs994271313	T/G	.	0.000110011	5_prime_UTR_variant	MODIFIER	.	1.82546e-06	1.86e-06	-3.45421e-08
RECK	9:36091128	.	A/C	.	0.000109123	intron_variant	MODIFIER	.	1.82455e-06	1.86e-06	-3.5454e-08
RECK	9:36052385	.	T/C	.	0.000109123	intron_variant	MODIFIER	.	1.82389e-06	1.86e-06	-3.61147e-08
RECK	9:36100391	rs144037912	C/G	M/I	0.000109123	missense_variant	MODERATE	benign(0.007)	1.82174e-06	1.86e-06	-3.8264e-08
RECK	9:36120579	.	C/T	.	0.000109146	intron_variant	MODIFIER	.	1.82128e-06	1.86e-06	-3.87165e-08
RECK	9:36036963	rs368806096	C/G	.	0.000109673	5_prime_UTR_variant	MODIFIER	.	1.82092e-06	1.86e-06	-3.90784e-08
RECK	9:36119003	rs374217619	G/T	.	0.00010917	intron_variant	MODIFIER	.	1.82051e-06	1.86e-06	-3.9487e-08
RECK	9:36118927	rs1018798695	C/T	P	0.000109123	synonymous_variant	LOW	.	1.82029e-06	1.86e-06	-3.97101e-08
RECK	9:36060181	rs184486873	A/G	.	0.000436491	intron_variant	MODIFIER	.	1.81797e-06	1.86e-06	-4.20267e-08
RECK	9:36122786	rs766898967	A/G	.	0.000109123	intron_variant	MODIFIER	.	1.81794e-06	1.86e-06	-4.2064e-08
RECK	9:36118835	COSM284531	T/C	R/C	0.000109123	missense_variant	MODERATE	probably_damaging(0.995)	1.81765e-06	1.86e-06	-4.23529e-08
RECK	9:36118847	rs138317907	A/G	D/N	0.000109123	missense_variant	MODERATE	probably_damaging(0.99)	1.81688e-06	1.86e-06	-4.3116e-08
RECK	9:36120725	.	G/A	T/A	0.000109123	missense_variant	MODERATE	benign(0.006)	1.8163e-06	1.86e-06	-4.36999e-08
RECK	9:36109989	rs371492299	A/G	V/I	0.000109123	missense_variant	MODERATE	benign(0.001)	1.81613e-06	1.86e-06	-4.38685e-08
RECK	9:36058941	rs199908114	G/A	.	0.000109123	intron_variant	MODIFIER	.	1.81465e-06	1.86e-06	-4.53511e-08
RECK	9:36063722	.	G/C	.	0.000109123	intron_variant	MODIFIER	.	1.81287e-06	1.86e-06	-4.71299e-08
RECK	9:36121786	rs547870655	G/GGT	.	0.000109123	intron_variant	MODIFIER	.	1.81248e-06	1.86e-06	-4.75206e-08
RECK	9:36100296	.	T/G	.	0.000109123	intron_variant	MODIFIER	.	1.80965e-06	1.86e-06	-5.03524e-08
RECK	9:36102009	rs757685443	T/G	.	0.000109385	intron_variant	MODIFIER	.	1.80777e-06	1.86e-06	-5.22323e-08
RECK	9:36063799	.	C/G	V	0.000218245	synonymous_variant	LOW	.	1.80772e-06	1.86e-06	-5.22824e-08
RECK	9:36036952	rs967030886	C/A	.	0.000109794	5_prime_UTR_variant	MODIFIER	.	1.80689e-06	1.86e-06	-5.31136e-08
RECK	9:36116970	rs193290650	G/A	.	0.000109123	intron_variant	MODIFIER	.	1.80666e-06	1.86e-06	-5.33398e-08
RECK	9:36063906	rs376332251	G/A	.	0.000109123	intron_variant	MODIFIER	.	1.8066e-06	1.86e-06	-5.34038e-08
RECK	9:36118743	rs187161076	C/T	.	0.000109242	intron_variant	MODIFIER	.	1.80657e-06	1.86e-06	-5.3429e-08
RECK	9:36123029	rs374233309	C/T	L/P	0.000109123	missense_variant	MODERATE	benign(0)	1.80646e-06	1.86e-06	-5.35406e-08
RECK	9:36122966	rs762679837	A/G	R/K	0.000109123	missense_variant	MODERATE	benign(0)	1.80638e-06	1.86e-06	-5.36181e-08
RECK	9:36100593	rs143937664	A/G	.	0.000109337	intron_variant	MODIFIER	.	1.80622e-06	1.86e-06	-5.37825e-08
RECK	9:36088035	rs987801547	T/C	.	0.000109146	intron_variant	MODIFIER	.	1.803e-06	1.86e-06	-5.70002e-08
RECK	9:36087700	rs752288922	G/A	Y/C	0.000109123	missense_variant	MODERATE	possibly_damaging(0.533)	1.80289e-06	1.86e-06	-5.7115e-08
RECK	9:36091377	rs911563575	C/T	.	0.000109123	intron_variant	MODIFIER	.	1.80252e-06	1.86e-06	-5.74822e-08
RECK	9:36102314	rs747803856	A/G	.	0.000109361	intron_variant	MODIFIER	.	1.80249e-06	1.86e-06	-5.75135e-08
RECK	9:36087650	rs758132202	CA/C	.	0.000109123	intron_variant	MODIFIER	.	1.80234e-06	1.86e-06	-5.76569e-08
RECK	9:36080601	rs752069229	G/A	.	0.000109194	splice_region_variant&intron_variant	LOW	.	1.80205e-06	1.86e-06	-5.79498e-08
RECK	9:36118758	COSM3657323	A/C	P/H	0.000109146	missense_variant&splice_region_variant	MODERATE	benign(0.19)	1.80159e-06	1.86e-06	-5.84107e-08
RECK	9:36122880	.	T/C	S	0.000109123	synonymous_variant	LOW	.	1.80037e-06	1.86e-06	-5.96342e-08
RECK	9:36091145	.	G/A	.	0.000109123	intron_variant	MODIFIER	.	1.80011e-06	1.86e-06	-5.98897e-08
RECK	9:36036931	.	A/G	.	0.000110497	5_prime_UTR_variant	MODIFIER	.	1.80009e-06	1.86e-06	-5.99061e-08
RECK	9:36036914	.	A/C	.	0.000111334	5_prime_UTR_variant	MODIFIER	.	1.79936e-06	1.86e-06	-6.06448e-08
RECK	9:36118870	rs374500095	T/C	A	0.000109123	synonymous_variant	LOW	.	1.79904e-06	1.86e-06	-6.09571e-08
RECK	9:36112425	rs758891260	T/C	S/L	0.000109123	missense_variant	MODERATE	benign(0.001)	1.79598e-06	1.86e-06	-6.4018e-08
RECK	9:36117265	rs774638727	T/C	.	0.000218866	intron_variant	MODIFIER	.	1.79547e-06	1.86e-06	-6.45336e-08
RECK	9:36121433	rs150579138	A/G	.	0.00011636	intron_variant	MODIFIER	.	1.79387e-06	1.86e-06	-6.61333e-08
RECK	9:36122958	rs56680169	T/C	A	0.000654736	synonymous_variant	LOW	.	1.79339e-06	1.86e-06	-6.66084e-08
RECK	9:36118930	rs750695711	A/G	S	0.000218245	synonymous_variant	LOW	.	1.79317e-06	1.86e-06	-6.68279e-08
RECK	9:36036989	rs764367530	A/C	.	0.000109409	5_prime_UTR_variant	MODIFIER	.	1.79296e-06	1.86e-06	-6.70414e-08
RECK	9:36100237	.	A/T	.	0.000109337	intron_variant	MODIFIER	.	1.79202e-06	1.86e-06	-6.798e-08
RECK	9:36118995	.	T/G	.	0.000436586	intron_variant	MODIFIER	.	1.79184e-06	1.86e-06	-6.81617e-08
RECK	9:36118893	.	C/G	S/T	0.000109123	missense_variant	MODERATE	benign(0.049)	1.79146e-06	1.86e-06	-6.85407e-08
RECK	9:36065722	.	T/C	.	0.000111259	intron_variant	MODIFIER	.	1.79039e-06	1.86e-06	-6.9606e-08
RECK	9:36105199	rs78749972	T/C	P/S	0.000109123	missense_variant	MODERATE	probably_damaging(0.996)	1.79014e-06	1.86e-06	-6.98627e-08
RECK	9:36036930	rs749563978	G/A	.	0.000110497	5_prime_UTR_variant	MODIFIER	.	1.78868e-06	1.86e-06	-7.13244e-08
RECK	9:36065713	.	A/T	.	0.000110668	intron_variant	MODIFIER	.	1.78512e-06	1.86e-06	-7.48786e-08
RECK	9:36065714	.	TACATGC/T	.	0.000110522	intron_variant	MODIFIER	.	1.78511e-06	1.86e-06	-7.48927e-08
RECK	9:36119048	rs1012486409	C/G	.	0.000110595	intron_variant	MODIFIER	.	1.78441e-06	1.86e-06	-7.55935e-08
RECK	9:36122891	rs752302753	T/C	A/V	0.000109123	missense_variant	MODERATE	benign(0.003)	1.78248e-06	1.86e-06	-7.75216e-08
RECK	9:36108195	.	T/TA	.	0.000109123	intron_variant	MODIFIER	.	1.78232e-06	1.86e-06	-7.76785e-08
RECK	9:36065625	.	A/G	.	0.000109194	splice_donor_variant	HIGH	.	1.78202e-06	1.86e-06	-7.79847e-08
RECK	9:36063728	.	C/A	.	0.000109123	intron_variant	MODIFIER	.	1.78169e-06	1.86e-06	-7.83062e-08
RECK	9:36059000	.	A/T	.	0.000109266	intron_variant	MODIFIER	.	1.78103e-06	1.86e-06	-7.89747e-08
RECK	9:36120729	.	C/T	I/T	0.000109123	missense_variant	MODERATE	benign(0.142)	1.77985e-06	1.86e-06	-8.01479e-08
RECK	9:36083536	rs140078883	T/C	S/F	0.000109123	missense_variant	MODERATE	probably_damaging(0.942)	1.7792e-06	1.86e-06	-8.07995e-08
RECK	9:36122973	rs148449362	A/G	R	0.000218245	synonymous_variant	LOW	.	1.77809e-06	1.86e-06	-8.1914e-08
RECK	9:36118836	rs527977068	A/G	R/H	0.000218245	missense_variant	MODERATE	probably_damaging(0.989)	1.77745e-06	1.86e-06	-8.25474e-08
RECK	9:36091135	.	T/C	.	0.000109123	intron_variant	MODIFIER	.	1.77737e-06	1.86e-06	-8.26328e-08
RECK	9:36118830	rs150265796	T/C	S/L	0.000218245	missense_variant	MODERATE	benign(0.355)	1.77565e-06	1.86e-06	-8.43461e-08
RECK	9:36112260	rs774430237	C/G	.	0.000109123	intron_variant	MODIFIER	.	1.77335e-06	1.86e-06	-8.66463e-08
RECK	9:36102091	rs140438492	C/A	.	0.000218245	splice_region_variant&intron_variant	LOW	.	1.77201e-06	1.86e-06	-8.79909e-08
RECK	9:36117154	.	T/C	L/F	0.000109123	missense_variant	MODERATE	possibly_damaging(0.506)	1.77061e-06	1.86e-06	-8.93939e-08
RECK	9:36058823	rs200662164	G/A	.	0.000109123	splice_region_variant&intron_variant	LOW	.	1.7696e-06	1.86e-06	-9.03951e-08
RECK	9:36122955	rs769615023&COSM6183747	A/G	S	0.000109123	synonymous_variant	LOW	.	1.76904e-06	1.86e-06	-9.09571e-08
RECK	9:36036976	rs147477093	T/C	.	0.000656886	5_prime_UTR_variant	MODIFIER	.	1.76653e-06	1.86e-06	-9.34679e-08
RECK	9:36105305	rs200257215	A/G	.	0.000109123	intron_variant	MODIFIER	.	1.76598e-06	1.86e-06	-9.40182e-08
RECK	9:36120566	.	T/C	.	0.000109123	intron_variant	MODIFIER	.	1.76541e-06	1.86e-06	-9.45939e-08
RECK	9:36083361	rs200045095	G/A	.	0.00261894	splice_region_variant&intron_variant	LOW	.	1.76267e-06	1.86e-06	-9.73307e-08
RECK	9:36087658	rs761165022	C/A	.	0.000109123	intron_variant	MODIFIER	.	1.76181e-06	1.86e-06	-9.81893e-08
RECK	9:36037055	rs559955662&COSM5359116	C/G	A	0.000218341	synonymous_variant	LOW	.	1.76124e-06	1.86e-06	-9.87584e-08
RECK	9:36118795	.	G/T	N/K	0.000109123	missense_variant	MODERATE	probably_damaging(0.979)	1.76123e-06	1.86e-06	-9.87747e-08
RECK	9:36036991	.	C/G	.	0.000109409	5_prime_UTR_variant	MODIFIER	.	1.76098e-06	1.86e-06	-9.90189e-08
RECK	9:36107984	rs148296262	G/C	L/V	0.00349192	missense_variant	MODERATE	benign(0.294)	1.76053e-06	1.86e-06	-9.94713e-08
RECK	9:36080623	rs770444578	G/A	I/V	0.000218341	missense_variant	MODERATE	possibly_damaging(0.601)	1.7589e-06	1.86e-06	-1.01098e-07
RECK	9:36118874	rs781720772	A/G	G/R	0.000218245	missense_variant	MODERATE	probably_damaging(0.983)	1.75807e-06	1.86e-06	-1.01933e-07
RECK	9:36100589	rs755592835	A/C	.	0.000109337	intron_variant	MODIFIER	.	1.7578e-06	1.86e-06	-1.02196e-07
RECK	9:36060096	.	T/C	.	0.000218245	intron_variant	MODIFIER	.	1.75707e-06	1.86e-06	-1.0293e-07
RECK	9:36102080	rs760974970	AT/A	.	0.0010929	intron_variant	MODIFIER	.	1.7559e-06	1.86e-06	-1.04101e-07
RECK	9:36120603	rs909988277	A/G	.	0.000109123	intron_variant	MODIFIER	.	1.75589e-06	1.86e-06	-1.04112e-07
RECK	9:36091229	rs546462273	A/G	R/H	0.000109123	missense_variant	MODERATE	possibly_damaging(0.808)	1.7496e-06	1.86e-06	-1.10404e-07
RECK	9:36080543	rs186479890	T/A	.	0.000545971	intron_variant	MODIFIER	.	1.74838e-06	1.86e-06	-1.11617e-07
RECK	9:36083502	rs769726835&COSM1674497	T/C	Q/*	0.000218245	stop_gained	HIGH	.	1.747e-06	1.86e-06	-1.13001e-07
RECK	9:36052308	rs58611653	C/T	R	0.00196421	synonymous_variant	LOW	.	1.74596e-06	1.86e-06	-1.14042e-07
RECK	9:36052414	rs985382558	T/C	.	0.000109194	intron_variant	MODIFIER	.	1.74541e-06	1.86e-06	-1.14588e-07
RECK	9:36102040	rs146543678	C/G	.	0.000218341	intron_variant	MODIFIER	.	1.74527e-06	1.86e-06	-1.14731e-07
RECK	9:36122750	rs878863518	T/C	.	0.000109146	intron_variant	MODIFIER	.	1.7441e-06	1.86e-06	-1.15904e-07
RECK	9:36118818	rs759341423	T/G	C/F	0.000218245	missense_variant	MODERATE	probably_damaging(0.999)	1.74362e-06	1.86e-06	-1.16379e-07
RECK	9:36058820	.	T/C	.	0.000436681	splice_region_variant&intron_variant	LOW	.	1.7394e-06	1.86e-06	-1.20602e-07
RECK	9:36083269	rs150477351	G/A	.	0.000218245	intron_variant	MODIFIER	.	1.73898e-06	1.86e-06	-1.21021e-07
RECK	9:36091278	.	C/G	A	0.000109123	synonymous_variant	LOW	.	1.7371e-06	1.86e-06	-1.22904e-07
RECK	9:36065525	.	C/T	.	0.000218531	intron_variant	MODIFIER	.	1.73668e-06	1.86e-06	-1.23322e-07
RECK	9:36117066	rs183480403&COSM3926792	T/C	L	0.000327368	synonymous_variant	LOW	.	1.73585e-06	1.86e-06	-1.24152e-07
RECK	9:36112254	rs369131382	A/G	.	0.000109123	intron_variant	MODIFIER	.	1.73356e-06	1.86e-06	-1.26436e-07
RECK	9:36110092	rs375407837	A/G	.	0.000109123	intron_variant	MODIFIER	.	1.73285e-06	1.86e-06	-1.27154e-07
RECK	9:36080705	rs969520316	A/C	.	0.000109194	intron_variant	MODIFIER	.	1.73101e-06	1.86e-06	-1.28989e-07
RECK	9:36083544	rs144022766	G/A	M/V	0.000436491	missense_variant	MODERATE	benign(0)	1.73081e-06	1.86e-06	-1.29194e-07
RECK	9:36083557	rs144381566	T/C	T/M	0.000218245	missense_variant	MODERATE	benign(0.075)	1.73048e-06	1.86e-06	-1.29519e-07
RECK	9:36065696	.	TATTATACATGC/T	.	0.000109601	intron_variant	MODIFIER	.	1.72795e-06	1.86e-06	-1.32051e-07
RECK	9:36117222	rs373645437	C/T	.	0.000872981	intron_variant	MODIFIER	.	1.72726e-06	1.86e-06	-1.32745e-07
RECK	9:36118760	rs149956466	A/T	F/I	0.000327368	missense_variant	MODERATE	benign(0.01)	1.72408e-06	1.86e-06	-1.35918e-07
RECK	9:36118959	rs902453990	A/T	I/N	0.000109123	missense_variant	MODERATE	benign(0.075)	1.7191e-06	1.86e-06	-1.40899e-07
RECK	9:36110063	.	A/C	D/E	0.000218245	missense_variant	MODERATE	benign(0.003)	1.71908e-06	1.86e-06	-1.40922e-07
RECK	9:36118918	rs377608152	A/C	V	0.000218245	synonymous_variant	LOW	.	1.71865e-06	1.86e-06	-1.41352e-07
RECK	9:36108076	rs138423971	G/A	S	0.000763859	synonymous_variant	LOW	.	1.71857e-06	1.86e-06	-1.41429e-07
RECK	9:36087866	rs200048340	C/T	S	0.000327368	synonymous_variant	LOW	.	1.71809e-06	1.86e-06	-1.41912e-07
RECK	9:36118966	COSM4720941	A/G	P	0.000109123	splice_region_variant&synonymous_variant	LOW	.	1.71657e-06	1.86e-06	-1.43433e-07
RECK	9:36036962	.	G/C	.	0.000109673	5_prime_UTR_variant	MODIFIER	.	1.71375e-06	1.86e-06	-1.46255e-07
RECK	9:36123024	.	G/C	H/Q	0.000109123	missense_variant	MODERATE	benign(0.024)	1.71287e-06	1.86e-06	-1.47133e-07
RECK	9:36102047	rs530604327	A/T	.	0.00010917	intron_variant	MODIFIER	.	1.71242e-06	1.86e-06	-1.47575e-07
RECK	9:36118765	rs147648443	T/C	C	0.000109123	synonymous_variant	LOW	.	1.70989e-06	1.86e-06	-1.5011e-07
RECK	9:36036970	.	T/C	.	0.000109553	5_prime_UTR_variant	MODIFIER	.	1.70914e-06	1.86e-06	-1.50856e-07
RECK	9:36121771	rs983256789	A/G	.	0.000327368	intron_variant	MODIFIER	.	1.70825e-06	1.86e-06	-1.51755e-07
RECK	9:36110065	rs565023879	A/G	R/H	0.000218245	missense_variant	MODERATE	benign(0.001)	1.70807e-06	1.86e-06	-1.51929e-07
RECK	9:36117042	COSM6275458	C/G	Q/H	0.000218245	missense_variant	MODERATE	probably_damaging(0.956)	1.70731e-06	1.86e-06	-1.52686e-07
RECK	9:36117215	.	C/G	.	0.000109123	intron_variant	MODIFIER	.	1.70516e-06	1.86e-06	-1.54838e-07
RECK	9:36058819	rs71521299	G/T	.	0.0116863	splice_region_variant&intron_variant	LOW	.	1.70516e-06	1.86e-06	-1.54839e-07
RECK	9:36083434	rs375748786	A/G	R/Q	0.000109123	missense_variant	MODERATE	benign(0.048)	1.70505e-06	1.86e-06	-1.54948e-07
RECK	9:36123000	rs147618963	T/C	P	0.000218245	synonymous_variant	LOW	.	1.69758e-06	1.86e-06	-1.62416e-07
RECK	9:36087637	.	T/C	.	0.000109146	intron_variant	MODIFIER	.	1.68821e-06	1.86e-06	-1.71789e-07
RECK	9:36037072	rs752307370	T/C	A/V	0.000218293	missense_variant	MODERATE	benign(0.014)	1.68531e-06	1.86e-06	-1.7469e-07
RECK	9:36112551	rs180814871	A/G	.	0.0033828	intron_variant	MODIFIER	.	1.6847e-06	1.86e-06	-1.75296e-07
RECK	9:36117028	rs139849271	G/T	F/V	0.000545613	missense_variant	MODERATE	benign(0.119)	1.68462e-06	1.86e-06	-1.7538e-07
RECK	9:36108163	rs112938194	T/A	K/N	0.00272807	missense_variant&splice_region_variant	MODERATE	probably_damaging(0.941)	1.67954e-06	1.86e-06	-1.80461e-07
RECK	9:36122920	rs372729870	G/A	I/V	0.000218245	missense_variant	MODERATE	benign(0.071)	1.67862e-06	1.86e-06	-1.81377e-07
RECK	9:36052166	rs186878673	A/C	.	0.000327368	intron_variant	MODIFIER	.	1.6747e-06	1.86e-06	-1.853e-07
RECK	9:36060204	rs34164423	A/G	.	0.00458315	intron_variant	MODIFIER	.	1.66864e-06	1.86e-06	-1.91356e-07
RECK	9:36037068	rs201017437	T/G	V/L	0.0217249	missense_variant	MODERATE	benign(0.006)	1.6655e-06	1.86e-06	-1.94502e-07
RECK	9:36091136	rs12235235	A/G	.	0.0365561	intron_variant	MODIFIER	.	1.66159e-06	1.86e-06	-1.98412e-07
RECK	9:36058832	.	T/C	F	0.000109123	synonymous_variant	LOW	.	1.65593e-06	1.86e-06	-2.04067e-07
RECK	9:36037166	.	T/C	.	0.000109433	intron_variant	MODIFIER	.	1.65509e-06	1.86e-06	-2.04905e-07
RECK	9:36058872	rs763497070	G/C	R/G	0.000109123	missense_variant	MODERATE	possibly_damaging(0.688)	1.64432e-06	1.86e-06	-2.15684e-07
RECK	9:36109877	.	T/G	.	0.000218245	intron_variant	MODIFIER	.	1.64428e-06	1.86e-06	-2.15723e-07
RECK	9:36063913	rs573082772	G/T	.	0.000327368	intron_variant	MODIFIER	.	1.626e-06	1.86e-06	-2.33998e-07
RECK	9:36063931	rs753688063	C/T	.	0.000327368	intron_variant	MODIFIER	.	1.626e-06	1.86e-06	-2.33998e-07
RECK	9:36091260	rs3736884&COSM150606	T/C	S	0.000654736	synonymous_variant	LOW	.	1.61126e-06	1.86e-06	-2.48739e-07
RECK	9:36108064	rs41277085	C/T	Y	0.0024007	synonymous_variant	LOW	.	1.56188e-06	1.86e-06	-2.98117e-07
RECK	9:36036936	.	C/G	.	0.000225175	5_prime_UTR_variant	MODIFIER	.	1.42572e-06	1.86e-06	-4.34277e-07
RECK	9:36123132	rs7042392	C/T	.	0.000109385	3_prime_UTR_variant	MODIFIER	.	1.36728e-06	1.86e-06	-4.92717e-07
RECK	9:36117266	rs973948746	A/G	.	0.000218914	intron_variant	MODIFIER	.	1.34031e-06	1.86e-06	-5.19695e-07

## Sheet: Table7 - SLC35E1 Pdiff
Supplementary Table 7. The Pdiff values for all rare loci in SLC35E1 gene
Gene	chrpos	Existing_variation	alt_ref	Amino_acids	MAF	Consequence	VEP IMPACT	PolyPhen	Prm	Porig	Prm - Porig
SLC35E1	19:16571517	.	C/T	.	0.000327368	downstream_gene_variant	MODIFIER	.	2.41234e-05	2.11e-06	2.20134e-05
SLC35E1	19:16556987	rs553987826	G/A	.	0.000436491	intron_variant	MODIFIER	.	1.0546e-05	2.11e-06	8.436e-06
SLC35E1	19:16572316	rs775722955	T/C	.	0.000110254	downstream_gene_variant	MODIFIER	.	8.76231e-06	2.11e-06	6.65231e-06
SLC35E1	19:16571451	rs945051975	C/T	.	0.000109123	downstream_gene_variant	MODIFIER	.	8.6787e-06	2.11e-06	6.5687e-06
SLC35E1	19:16567984	.	A/C	.	0.000219106	intron_variant	MODIFIER	.	8.28255e-06	2.11e-06	6.17255e-06
SLC35E1	19:16555182	rs775727051	A/G	T	0.000109123	synonymous_variant	LOW	.	7.99948e-06	2.11e-06	5.88948e-06
SLC35E1	19:16568012	rs746840628	T/C	.	0.000109123	intron_variant	MODIFIER	.	7.34165e-06	2.11e-06	5.23165e-06
SLC35E1	19:16553693	rs368062600	A/G	R/C	0.000109123	missense_variant	MODERATE	possibly_damaging(0.451)	7.32907e-06	2.11e-06	5.21907e-06
SLC35E1	19:16571644	rs897793522	T/C	.	0.000109361	downstream_gene_variant	MODIFIER	.	7.12898e-06	2.11e-06	5.01898e-06
SLC35E1	19:16566545	rs375432387	T/A	V/D	0.000109123	missense_variant	MODERATE	possibly_damaging(0.556)	6.22894e-06	2.11e-06	4.11894e-06
SLC35E1	19:16566509	.	T/G	.	0.000109123	intron_variant	MODIFIER	.	6.13605e-06	2.11e-06	4.02605e-06
SLC35E1	19:16572170	rs1015505617	C/G	.	0.000109123	downstream_gene_variant	MODIFIER	.	5.20838e-06	2.11e-06	3.09838e-06
SLC35E1	19:16567988	rs770596671	T/C	.	0.000218436	intron_variant	MODIFIER	.	4.88404e-06	2.11e-06	2.77404e-06
SLC35E1	19:16553897	.	T/C	A/T	0.000109123	missense_variant	MODERATE	benign(0.253)	4.40873e-06	2.11e-06	2.29873e-06
SLC35E1	19:16571863	.	T/G	.	0.000109818	downstream_gene_variant	MODIFIER	.	3.81798e-06	2.11e-06	1.70798e-06
SLC35E1	19:16553992	rs117614705	T/C	.	0.00115075	intron_variant	MODIFIER	.	3.63232e-06	2.11e-06	1.52232e-06
SLC35E1	19:16553901	rs773244448&COSM1391284&COSM1391283	A/G	Y	0.000218245	synonymous_variant	LOW	.	3.48763e-06	2.11e-06	1.37763e-06
SLC35E1	19:16555237	.	C/G	S/C	0.000218245	missense_variant	MODERATE	probably_damaging(0.999)	3.46234e-06	2.11e-06	1.35234e-06
SLC35E1	19:16553947	rs752794846	A/G	.	0.000327511	intron_variant	MODIFIER	.	3.27353e-06	2.11e-06	1.16353e-06
SLC35E1	19:16553868	rs117188970	A/G	L	0.0449585	synonymous_variant	LOW	.	2.4723e-06	2.11e-06	3.62295e-07
SLC35E1	19:16553657	rs373918690	C/G	.	0.000327368	3_prime_UTR_variant	MODIFIER	.	2.25192e-06	2.11e-06	1.41921e-07
SLC35E1	19:16567984	rs200612269	T/C	.	0.000984467	intron_variant	MODIFIER	.	2.11464e-06	2.11e-06	4.63651e-09
SLC35E1	19:16553646	rs146606262	C/A	.	0.000109123	3_prime_UTR_variant	MODIFIER	.	2.06778e-06	2.11e-06	-4.22152e-08
SLC35E1	19:16571911	rs535014968	A/G	.	0.000984898	downstream_gene_variant	MODIFIER	.	2.06349e-06	2.11e-06	-4.65109e-08
SLC35E1	19:16567978	.	T/G	.	0.000109361	intron_variant	MODIFIER	.	2.03672e-06	2.11e-06	-7.32825e-08
SLC35E1	19:16555358	rs756830191	T/C	A/T	0.000109123	missense_variant	MODERATE	benign(0.015)	2.01019e-06	2.11e-06	-9.98135e-08
SLC35E1	19:16568029	rs372635795&COSM6036944&COSM6036943&COSM6036942	C/T	.	0.000109123	splice_region_variant&intron_variant	LOW	.	2.00186e-06	2.11e-06	-1.08142e-07
SLC35E1	19:16555132	rs143646296	T/C	.	0.000109123	intron_variant	MODIFIER	.	1.99044e-06	2.11e-06	-1.19561e-07
SLC35E1	19:16556862	rs575410392	C/A	.	0.000109123	intron_variant	MODIFIER	.	1.98708e-06	2.11e-06	-1.22923e-07
SLC35E1	19:16555305	.	A/G	L	0.000109123	synonymous_variant	LOW	.	1.97149e-06	2.11e-06	-1.38507e-07
SLC35E1	19:16555350	rs768091661	A/G	S	0.000109123	synonymous_variant	LOW	.	1.95844e-06	2.11e-06	-1.51565e-07
SLC35E1	19:16572329	.	A/C	.	0.000111309	downstream_gene_variant	MODIFIER	.	1.95493e-06	2.11e-06	-1.55066e-07
SLC35E1	19:16553725	rs371174699	T/C	R/Q	0.000109123	missense_variant	MODERATE	probably_damaging(0.968)	1.94035e-06	2.11e-06	-1.6965e-07
SLC35E1	19:16566470	.	G/A	.	0.000109123	intron_variant	MODIFIER	.	1.9384e-06	2.11e-06	-1.71604e-07
SLC35E1	19:16571909	rs910681398	T/C	.	0.000109433	downstream_gene_variant	MODIFIER	.	1.77907e-06	2.11e-06	-3.30927e-07
SLC35E1	19:16571895	.	T/C	.	0.000109433	downstream_gene_variant	MODIFIER	.	1.76736e-06	2.11e-06	-3.42642e-07
SLC35E1	19:16571612	.	T/G	.	0.000109123	downstream_gene_variant	MODIFIER	.	1.55314e-06	2.11e-06	-5.56861e-07
SLC35E1	19:16555108	rs767568704	TG/T	.	0.00010917	intron_variant	MODIFIER	.	1.54908e-06	2.11e-06	-5.60921e-07
SLC35E1	19:16568088	rs138285196	T/C	V/I	0.000109146	missense_variant	MODERATE	benign(0.005)	1.5424e-06	2.11e-06	-5.67598e-07
SLC35E1	19:16556949	rs11882657	T/C	.	0.00349192	intron_variant	MODIFIER	.	1.52749e-06	2.11e-06	-5.82513e-07
SLC35E1	19:16572169	rs781026728	C/T	.	0.000109123	downstream_gene_variant	MODIFIER	.	1.51387e-06	2.11e-06	-5.96134e-07
SLC35E1	19:16568013	rs982590000	A/G	.	0.000109123	intron_variant	MODIFIER	.	1.51028e-06	2.11e-06	-5.99722e-07
SLC35E1	19:16566739	.	A/G	.	0.000109266	intron_variant	MODIFIER	.	1.50135e-06	2.11e-06	-6.0865e-07
SLC35E1	19:16572227	.	G/C	.	0.000109123	downstream_gene_variant	MODIFIER	.	1.49641e-06	2.11e-06	-6.13586e-07
SLC35E1	19:16571422	rs985033877	T/G	.	0.000109123	downstream_gene_variant	MODIFIER	.	1.49581e-06	2.11e-06	-6.14188e-07
SLC35E1	19:16571922	rs555330778	T/C	.	0.000873553	downstream_gene_variant	MODIFIER	.	1.49527e-06	2.11e-06	-6.14729e-07
SLC35E1	19:16571611	rs770777773	T/G	.	0.000109123	downstream_gene_variant	MODIFIER	.	1.49189e-06	2.11e-06	-6.18108e-07
SLC35E1	19:16556950	rs934537370	A/G	.	0.000109123	intron_variant	MODIFIER	.	1.48676e-06	2.11e-06	-6.23241e-07
SLC35E1	19:16572280	.	A/G	.	0.000109553	downstream_gene_variant	MODIFIER	.	1.48642e-06	2.11e-06	-6.23575e-07
SLC35E1	19:16571492	.	A/G	.	0.000109123	downstream_gene_variant	MODIFIER	.	1.47804e-06	2.11e-06	-6.31961e-07
SLC35E1	19:16553583	rs1009867055	A/G	.	0.000109123	3_prime_UTR_variant	MODIFIER	.	1.46144e-06	2.11e-06	-6.48563e-07
SLC35E1	19:16572097	rs201579767	T/C	.	0.000109481	downstream_gene_variant	MODIFIER	.	1.45578e-06	2.11e-06	-6.54221e-07
SLC35E1	19:16556924	rs1017033690	C/T	.	0.000109123	intron_variant	MODIFIER	.	1.4529e-06	2.11e-06	-6.57096e-07
SLC35E1	19:16572293	.	CGGGT/C	.	0.000109601	downstream_gene_variant	MODIFIER	.	1.44037e-06	2.11e-06	-6.69626e-07
SLC35E1	19:16568099	rs941557153	G/A	M/T	0.000109123	missense_variant	MODERATE	benign(0.026)	1.43885e-06	2.11e-06	-6.71154e-07
SLC35E1	19:16568082	rs779346314	T/C	A/T	0.000109123	missense_variant	MODERATE	benign(0.116)	1.43718e-06	2.11e-06	-6.72821e-07
SLC35E1	19:16557017	rs1041944107	T/C	.	0.000109123	intron_variant	MODIFIER	.	1.42244e-06	2.11e-06	-6.87561e-07
SLC35E1	19:16553824	.	T/C	S/N	0.000109123	missense_variant	MODERATE	benign(0)	1.42195e-06	2.11e-06	-6.88055e-07
SLC35E1	19:16572017	.	A/G	.	0.000109123	downstream_gene_variant	MODIFIER	.	1.41515e-06	2.11e-06	-6.94855e-07
SLC35E1	19:16553941	rs776476640	C/A	.	0.000109146	intron_variant	MODIFIER	.	1.41061e-06	2.11e-06	-6.99391e-07
SLC35E1	19:16571572	.	A/G	.	0.000109123	downstream_gene_variant	MODIFIER	.	1.39644e-06	2.11e-06	-7.13558e-07
SLC35E1	19:16572156	.	T/C	.	0.000109123	downstream_gene_variant	MODIFIER	.	1.38468e-06	2.11e-06	-7.25318e-07
SLC35E1	19:16568000	.	T/C	.	0.000109123	intron_variant	MODIFIER	.	1.36873e-06	2.11e-06	-7.41271e-07
SLC35E1	19:16571850	rs190463095	A/C	.	0.000220119	downstream_gene_variant	MODIFIER	.	1.36374e-06	2.11e-06	-7.46256e-07
SLC35E1	19:16568100	.	G/T	M/L	0.000109123	missense_variant	MODERATE	benign(0)	1.35272e-06	2.11e-06	-7.57279e-07
SLC35E1	19:16553918	.	A/G	.	0.000218245	intron_variant	MODIFIER	.	1.32987e-06	2.11e-06	-7.80128e-07
SLC35E1	19:16572344	.	T/G	.	0.000227066	downstream_gene_variant	MODIFIER	.	1.30298e-06	2.11e-06	-8.07024e-07
SLC35E1	19:16568122	rs781130681	A/G	T	0.000109123	synonymous_variant	LOW	.	1.29494e-06	2.11e-06	-8.15057e-07
SLC35E1	19:16571550	rs139292876	A/G	.	0.000218245	downstream_gene_variant	MODIFIER	.	1.2898e-06	2.11e-06	-8.202e-07
SLC35E1	19:16555057	rs80113444	T/C	.	0.000998668	intron_variant	MODIFIER	.	1.2891e-06	2.11e-06	-8.20897e-07
SLC35E1	19:16572353	rs1055714318	T/G	.	0.000113817	downstream_gene_variant	MODIFIER	.	1.28847e-06	2.11e-06	-8.21533e-07
SLC35E1	19:16568056	rs542109613&COSM4783070&COSM1391290&COSM1391289	T/C	S	0.000218245	synonymous_variant	LOW	.	1.28826e-06	2.11e-06	-8.21745e-07
SLC35E1	19:16555409	rs375962905	A/G	.	0.000109146	intron_variant	MODIFIER	.	1.27703e-06	2.11e-06	-8.32969e-07
SLC35E1	19:16568074	rs148792893	A/G	A	0.000545613	synonymous_variant	LOW	.	1.27621e-06	2.11e-06	-8.3379e-07
SLC35E1	19:16555372	rs745863119	A/G	T/M	0.000109123	missense_variant	MODERATE	benign(0.24)	1.26547e-06	2.11e-06	-8.44533e-07
SLC35E1	19:16571983	rs575018623	T/C	.	0.000763859	downstream_gene_variant	MODIFIER	.	1.26461e-06	2.11e-06	-8.45391e-07
SLC35E1	19:16572167	.	A/G	.	0.000109123	downstream_gene_variant	MODIFIER	.	1.25361e-06	2.11e-06	-8.56389e-07
SLC35E1	19:16555114	.	A/G	.	0.000327439	intron_variant	MODIFIER	.	1.25302e-06	2.11e-06	-8.56979e-07
SLC35E1	19:16572124	.	C/G	.	0.000109266	downstream_gene_variant	MODIFIER	.	1.23345e-06	2.11e-06	-8.76553e-07
SLC35E1	19:16553833	rs200335570&COSM293428	T/C	R/H	0.000109123	missense_variant	MODERATE	benign(0)	1.18537e-06	2.11e-06	-9.24627e-07
SLC35E1	19:16553857	rs376710881	A/G	T/I	0.000327368	missense_variant	MODERATE	benign(0.014)	1.16426e-06	2.11e-06	-9.45737e-07
SLC35E1	19:16567982	.	T/C	.	0.000218723	intron_variant	MODIFIER	.	1.16395e-06	2.11e-06	-9.46048e-07
SLC35E1	19:16557031	.	A/C	.	0.000109146	intron_variant	MODIFIER	.	1.14907e-06	2.11e-06	-9.60934e-07
SLC35E1	19:16553632	rs200034712	C/G	.	0.000218245	3_prime_UTR_variant	MODIFIER	.	1.11961e-06	2.11e-06	-9.9039e-07
SLC35E1	19:16556886	.	C/A	.	0.000218245	intron_variant	MODIFIER	.	1.0777e-06	2.11e-06	-1.0323e-06
SLC35E1	19:16571900	.	G/C	.	0.000109457	downstream_gene_variant	MODIFIER	.	1.00536e-06	2.11e-06	-1.10464e-06
SLC35E1	19:16555270	rs140984339	C/T	N/S	0.000763859	missense_variant	MODERATE	probably_damaging(0.914)	9.59679e-07	2.11e-06	-1.15032e-06
SLC35E1	19:16555299	rs200765517	A/G	L	0.000218245	synonymous_variant	LOW	.	8.83672e-07	2.11e-06	-1.22633e-06

## Sheet: Table8 - RFX3 Pdiff
Supplementary Table 8. The Pdiff values for all rare loci in RFX3 gene
Gene	chrpos	Existing_variation	alt_ref	Amino_acids	MAF	Consequence	VEP IMPACT	PolyPhen	Prm	Porig	Prm - Porig
RFX3	9:3293303	rs116522197	T/G	.	0.000327368	intron_variant	MODIFIER	.	4.14308e-05	2.23e-06	3.92008e-05
RFX3	9:3344901	rs116747687	A/G	.	0.000436491	intron_variant	MODIFIER	.	3.66497e-05	2.23e-06	3.44197e-05
RFX3	9:3263179	rs187134755	C/T	.	0.000218531	intron_variant	MODIFIER	.	1.39256e-05	2.23e-06	1.16956e-05
RFX3	9:3247951	rs2229356&COSM3763880	T/C	.	0.00250982	intron_variant	MODIFIER	.	6.98667e-06	2.23e-06	4.75667e-06
RFX3	9:3330198	rs1039814442	C/G	.	0.000218245	intron_variant	MODIFIER	.	6.75745e-06	2.23e-06	4.52745e-06
RFX3	9:3288289	.	T/G	.	0.000109146	intron_variant	MODIFIER	.	4.86153e-06	2.23e-06	2.63153e-06
RFX3	9:3228776	.	T/C	.	0.000109218	intron_variant	MODIFIER	.	4.82437e-06	2.23e-06	2.59437e-06
RFX3	9:3301461	rs893889484	C/T	.	0.000109337	intron_variant	MODIFIER	.	4.60472e-06	2.23e-06	2.37472e-06
RFX3	9:3225188	rs376315262	G/C	A/P	0.000109123	missense_variant	MODERATE	benign(0)	4.57816e-06	2.23e-06	2.34816e-06
RFX3	9:3266295	.	A/G	T	0.00010917	synonymous_variant	LOW	.	4.26453e-06	2.23e-06	2.03453e-06
RFX3	9:3395592	.	A/G	.	0.000109123	5_prime_UTR_variant	MODIFIER	.	4.25773e-06	2.23e-06	2.02773e-06
RFX3	9:3266332	rs761544168	T/TA	.	0.000222222	intron_variant	MODIFIER	.	4.19655e-06	2.23e-06	1.96655e-06
RFX3	9:3228798	rs186948365	A/T	.	0.000109123	intron_variant	MODIFIER	.	4.07731e-06	2.23e-06	1.84731e-06
RFX3	9:3301519	.	C/A	.	0.000218245	intron_variant	MODIFIER	.	4.06561e-06	2.23e-06	1.83561e-06
RFX3	9:3344841	rs540477695	C/T	.	0.000109123	intron_variant	MODIFIER	.	4.06157e-06	2.23e-06	1.83157e-06
RFX3	9:3330439	rs367887438	A/C	G	0.000109123	synonymous_variant	LOW	.	3.91659e-06	2.23e-06	1.68659e-06
RFX3	9:3275428	rs758851444	C/T	.	0.000109242	intron_variant	MODIFIER	.	3.83499e-06	2.23e-06	1.60499e-06
RFX3	9:3271018	rs41314211	A/G	T/I	0.0109123	missense_variant	MODERATE	benign(0.009)	3.53492e-06	2.23e-06	1.30492e-06
RFX3	9:3344786	rs7036456	A/G	.	0.0210653	intron_variant	MODIFIER	.	3.53352e-06	2.23e-06	1.30352e-06
RFX3	9:3228954	.	C/T	.	0.000327368	intron_variant	MODIFIER	.	3.44242e-06	2.23e-06	1.21242e-06
RFX3	9:3395441	rs371674041	G/A	.	0.000109123	intron_variant	MODIFIER	.	3.24382e-06	2.23e-06	1.01382e-06
RFX3	9:3275625	rs147166296	G/C	.	0.00567562	intron_variant	MODIFIER	.	3.22988e-06	2.23e-06	9.99876e-07
RFX3	9:3270934	rs570000112	G/A	.	0.000872981	intron_variant	MODIFIER	.	3.04361e-06	2.23e-06	8.13606e-07
RFX3	9:3395400	rs905507272	C/T	.	0.000218818	intron_variant	MODIFIER	.	2.73275e-06	2.23e-06	5.02746e-07
RFX3	9:3293298	rs369621022	G/A	.	0.000436491	intron_variant	MODIFIER	.	2.65979e-06	2.23e-06	4.2979e-07
RFX3	9:3257122	rs35483263	T/C	Q	0.00960279	synonymous_variant	LOW	.	2.63997e-06	2.23e-06	4.09974e-07
RFX3	9:3288175	rs146022525	G/C	M/I	0.000109123	missense_variant	MODERATE	benign(0.017)	2.56451e-06	2.23e-06	3.3451e-07
RFX3	9:3224963	.	A/T	.	0.000218245	3_prime_UTR_variant	MODIFIER	.	2.55512e-06	2.23e-06	3.25118e-07
RFX3	9:3256906	rs113462937	G/T	.	0.00658762	intron_variant	MODIFIER	.	2.54237e-06	2.23e-06	3.12373e-07
RFX3	9:3247780	rs200970164	A/G	.	0.000436586	intron_variant	MODIFIER	.	2.52794e-06	2.23e-06	2.97936e-07
RFX3	9:3247690	.	C/T	.	0.00802551	intron_variant	MODIFIER	.	2.50668e-06	2.23e-06	2.76682e-07
RFX3	9:3277409	rs941969562	T/C	G/S	0.000436491	missense_variant	MODERATE	benign(0.024)	2.45299e-06	2.23e-06	2.22992e-07
RFX3	9:3288035	rs756273952	T/G	.	0.000546926	intron_variant	MODIFIER	.	2.3715e-06	2.23e-06	1.41497e-07
RFX3	9:3257033	.	A/G	P/L	0.00010917	missense_variant	MODERATE	possibly_damaging(0.749)	2.32871e-06	2.23e-06	9.87081e-08
RFX3	9:3293344	rs566805700	C/A	.	0.000437254	intron_variant	MODIFIER	.	2.2828e-06	2.23e-06	5.27962e-08
RFX3	9:3225376	rs7031388	A/G	.	0.000984898	intron_variant	MODIFIER	.	2.26207e-06	2.23e-06	3.20685e-08
RFX3	9:3330529	rs748045110	A/G	.	0.000109146	intron_variant	MODIFIER	.	2.25847e-06	2.23e-06	2.84732e-08
RFX3	9:3228897	.	C/A	.	0.00010917	splice_region_variant&intron_variant	LOW	.	2.23137e-06	2.23e-06	1.36671e-09
RFX3	9:3257033	rs371245427	C/G	P/R	0.000218293	missense_variant	MODERATE	possibly_damaging(0.459)	2.23137e-06	2.23e-06	1.36671e-09
RFX3	9:3266295	rs375419615	T/G	T	0.000218293	synonymous_variant	LOW	.	2.23137e-06	2.23e-06	1.36671e-09
RFX3	9:3266332	rs568635699	TA/T	.	0.00906114	intron_variant	MODIFIER	.	2.23137e-06	2.23e-06	1.36671e-09
RFX3	9:3330529	.	C/G	.	0.000109146	intron_variant	MODIFIER	.	2.23137e-06	2.23e-06	1.36671e-09
RFX3	9:3395400	rs141539426	T/TG	.	0.000874126	intron_variant	MODIFIER	.	2.23137e-06	2.23e-06	1.36671e-09
RFX3	9:3271163	rs374746608	T/C	.	0.000109146	intron_variant	MODIFIER	.	2.21956e-06	2.23e-06	-1.04387e-08
RFX3	9:3330538	rs781491620	G/A	.	0.000109146	intron_variant	MODIFIER	.	2.20201e-06	2.23e-06	-2.79903e-08
RFX3	9:3346591	rs115711584	G/A	.	0.000109146	intron_variant	MODIFIER	.	2.19557e-06	2.23e-06	-3.44328e-08
RFX3	9:3270611	rs12003214	C/A	.	0.00154321	intron_variant	MODIFIER	.	2.19408e-06	2.23e-06	-3.59223e-08
RFX3	9:3228930	rs371856893	T/C	.	0.000109123	intron_variant	MODIFIER	.	2.18579e-06	2.23e-06	-4.42078e-08
RFX3	9:3277530	rs543532677	C/T	.	0.00491266	intron_variant	MODIFIER	.	2.18573e-06	2.23e-06	-4.4272e-08
RFX3	9:3330388	rs34162079	G/A	T	0.000109123	synonymous_variant	LOW	.	2.18534e-06	2.23e-06	-4.46558e-08
RFX3	9:3266334	rs202125956	C/A	.	0.000109123	intron_variant	MODIFIER	.	2.17412e-06	2.23e-06	-5.5883e-08
RFX3	9:3275444	.	G/A	.	0.000109218	intron_variant	MODIFIER	.	2.16667e-06	2.23e-06	-6.33282e-08
RFX3	9:3301721	.	A/C	.	0.000109433	intron_variant	MODIFIER	.	2.16063e-06	2.23e-06	-6.93719e-08
RFX3	9:3248236	rs748695477	G/A	.	0.000109385	intron_variant	MODIFIER	.	2.15587e-06	2.23e-06	-7.41257e-08
RFX3	9:3395640	rs781611302	C/T	.	0.000109123	intron_variant	MODIFIER	.	2.15415e-06	2.23e-06	-7.58522e-08
RFX3	9:3277350	rs368546178	C/T	Q	0.000109123	synonymous_variant	LOW	.	2.15398e-06	2.23e-06	-7.6025e-08
RFX3	9:3323921	rs959149977	G/A	.	0.000109123	intron_variant	MODIFIER	.	2.15168e-06	2.23e-06	-7.83196e-08
RFX3	9:3275635	rs753688905	G/GA	.	0.000218341	intron_variant	MODIFIER	.	2.1483e-06	2.23e-06	-8.1701e-08
RFX3	9:3247809	rs578103266	A/T	.	0.000109123	intron_variant	MODIFIER	.	2.14765e-06	2.23e-06	-8.23539e-08
RFX3	9:3275457	.	C/G	.	0.00010917	intron_variant	MODIFIER	.	2.1462e-06	2.23e-06	-8.37962e-08
RFX3	9:3225048	rs764238395	C/T	A	0.000109123	synonymous_variant	LOW	.	2.14538e-06	2.23e-06	-8.46183e-08
RFX3	9:3225238	.	C/T	D/G	0.000109123	missense_variant	MODERATE	benign(0.038)	2.14475e-06	2.23e-06	-8.52494e-08
RFX3	9:3257275	rs181488825	T/A	.	0.000109218	intron_variant	MODIFIER	.	2.14366e-06	2.23e-06	-8.63399e-08
RFX3	9:3247813	rs773949507	G/C	.	0.000109123	intron_variant	MODIFIER	.	2.14271e-06	2.23e-06	-8.72857e-08
RFX3	9:3266144	.	C/G	.	0.000109218	intron_variant	MODIFIER	.	2.14113e-06	2.23e-06	-8.88736e-08
RFX3	9:3228882	rs780013042	C/T	D/G	0.000109123	missense_variant	MODERATE	benign(0.127)	2.13233e-06	2.23e-06	-9.767e-08
RFX3	9:3256939	.	T/C	.	0.000109194	intron_variant	MODIFIER	.	2.12965e-06	2.23e-06	-1.0035e-07
RFX3	9:3324047	rs543201645	A/G	.	0.000109123	intron_variant	MODIFIER	.	2.12805e-06	2.23e-06	-1.01945e-07
RFX3	9:3248119	rs547006837	G/A	R	0.000109123	synonymous_variant	LOW	.	2.12678e-06	2.23e-06	-1.03218e-07
RFX3	9:3288333	rs183441027	T/C	.	0.000109409	intron_variant	MODIFIER	.	2.12399e-06	2.23e-06	-1.06006e-07
RFX3	9:3270601	.	C/A	.	0.000109529	intron_variant	MODIFIER	.	2.12178e-06	2.23e-06	-1.08218e-07
RFX3	9:3257269	.	T/C	.	0.00010917	intron_variant	MODIFIER	.	2.12049e-06	2.23e-06	-1.09507e-07
RFX3	9:3271204	.	C/T	.	0.000109194	intron_variant	MODIFIER	.	2.11981e-06	2.23e-06	-1.10192e-07
RFX3	9:3270977	.	C/G	.	0.000109123	intron_variant	MODIFIER	.	2.11787e-06	2.23e-06	-1.12133e-07
RFX3	9:3228940	rs763375079	A/T	.	0.000109146	intron_variant	MODIFIER	.	2.1176e-06	2.23e-06	-1.12404e-07
RFX3	9:3228897	.	A/AC	.	0.000218293	intron_variant	MODIFIER	.	2.11702e-06	2.23e-06	-1.12983e-07
RFX3	9:3275427	.	C/CTTGA	.	0.000109218	intron_variant	MODIFIER	.	2.11273e-06	2.23e-06	-1.17266e-07
RFX3	9:3270933	rs750174577	TA/T	.	0.000109123	intron_variant	MODIFIER	.	2.112e-06	2.23e-06	-1.17995e-07
RFX3	9:3262922	rs138593830	A/G	.	0.000109123	intron_variant	MODIFIER	.	2.1114e-06	2.23e-06	-1.18598e-07
RFX3	9:3271103	.	CTAATAAATTAGAG/C	-/L*FIX	0.000109123	stop_gained&frameshift_variant	HIGH	.	2.10713e-06	2.23e-06	-1.22865e-07
RFX3	9:3344781	.	T/A	.	0.000109123	intron_variant	MODIFIER	.	2.10437e-06	2.23e-06	-1.25628e-07
RFX3	9:3266387	rs117060732	A/G	.	0.000109553	intron_variant	MODIFIER	.	2.10364e-06	2.23e-06	-1.26357e-07
RFX3	9:3270588	rs1017241964	G/T	.	0.000109242	intron_variant	MODIFIER	.	2.1005e-06	2.23e-06	-1.29495e-07
RFX3	9:3247676	rs942520850	C/T	.	0.000109218	intron_variant	MODIFIER	.	2.10009e-06	2.23e-06	-1.29912e-07
RFX3	9:3263136	rs564040059	A/C	.	0.000109123	intron_variant	MODIFIER	.	2.09888e-06	2.23e-06	-1.31122e-07
RFX3	9:3344917	rs1042683044	C/G	.	0.000109123	intron_variant	MODIFIER	.	2.09819e-06	2.23e-06	-1.31814e-07
RFX3	9:3247853	.	C/T	.	0.00010917	intron_variant	MODIFIER	.	2.0968e-06	2.23e-06	-1.33198e-07
RFX3	9:3323891	rs747696668	G/T	.	0.000218245	intron_variant	MODIFIER	.	2.09667e-06	2.23e-06	-1.33329e-07
RFX3	9:3247695	rs867459118	T/C	.	0.00010917	intron_variant	MODIFIER	.	2.09615e-06	2.23e-06	-1.33848e-07
RFX3	9:3301600	rs142527085	T/C	T	0.000327368	synonymous_variant	LOW	.	2.09537e-06	2.23e-06	-1.34628e-07
RFX3	9:3248054	rs772675197	A/G	T/I	0.000109123	missense_variant	MODERATE	possibly_damaging(0.628)	2.09468e-06	2.23e-06	-1.3532e-07
RFX3	9:3270393	rs551991758	A/G	P	0.000109123	synonymous_variant	LOW	.	2.08994e-06	2.23e-06	-1.40064e-07
RFX3	9:3247860	rs762438651	G/A	.	0.00010917	intron_variant	MODIFIER	.	2.08834e-06	2.23e-06	-1.41662e-07
RFX3	9:3247803	.	G/A	.	0.000109123	intron_variant	MODIFIER	.	2.08647e-06	2.23e-06	-1.43533e-07
RFX3	9:3263176	.	T/A	.	0.00010917	intron_variant	MODIFIER	.	2.08555e-06	2.23e-06	-1.4445e-07
RFX3	9:3263106	rs771968114	C/T	.	0.000109123	intron_variant	MODIFIER	.	2.08338e-06	2.23e-06	-1.46616e-07
RFX3	9:3277261	.	C/T	.	0.000109146	intron_variant	MODIFIER	.	2.08285e-06	2.23e-06	-1.4715e-07
RFX3	9:3288329	.	T/C	.	0.000109385	intron_variant	MODIFIER	.	2.08249e-06	2.23e-06	-1.4751e-07
RFX3	9:3330370	rs200759434	A/G	G	0.000872981	synonymous_variant	LOW	.	2.07462e-06	2.23e-06	-1.55381e-07
RFX3	9:3277264	rs574346808	C/T	.	0.000109123	intron_variant	MODIFIER	.	2.07203e-06	2.23e-06	-1.57972e-07
RFX3	9:3288244	rs199563336	A/G	N	0.000218245	synonymous_variant	LOW	.	2.07041e-06	2.23e-06	-1.59594e-07
RFX3	9:3271012	.	A/G	T/I	0.000109123	missense_variant	MODERATE	benign(0.001)	2.07017e-06	2.23e-06	-1.59829e-07
RFX3	9:3228871	rs191847028	T/C	V/M	0.000109123	missense_variant	MODERATE	benign(0.003)	2.06655e-06	2.23e-06	-1.63448e-07
RFX3	9:3225071	rs996213173&COSM323044	T/C	A/T	0.000109123	missense_variant	MODERATE	benign(0)	2.06655e-06	2.23e-06	-1.63448e-07
RFX3	9:3257259	rs564123544	T/C	.	0.000109146	intron_variant	MODIFIER	.	2.06177e-06	2.23e-06	-1.68233e-07
RFX3	9:3225114	rs757220727&COSM178631	A/G	S	0.000109123	synonymous_variant	LOW	.	2.05688e-06	2.23e-06	-1.7312e-07
RFX3	9:3247930	COSM40548	A/G	.	0.000109123	intron_variant	MODIFIER	.	2.05219e-06	2.23e-06	-1.77813e-07
RFX3	9:3225319	rs41312822	T/A	.	0.0192056	intron_variant	MODIFIER	.	2.05143e-06	2.23e-06	-1.78573e-07
RFX3	9:3330505	rs562377422&COSM4858515&COSM4858516&COSM753611&COSM753612	T/C	T	0.000218245	synonymous_variant	LOW	.	2.05114e-06	2.23e-06	-1.78857e-07
RFX3	9:3277305	rs201503501	G/T	.	0.000545613	intron_variant	MODIFIER	.	2.05107e-06	2.23e-06	-1.78931e-07
RFX3	9:3324196	.	G/T	.	0.000109194	intron_variant	MODIFIER	.	2.04979e-06	2.23e-06	-1.80213e-07
RFX3	9:3262953	rs150083559	A/G	V	0.000436491	synonymous_variant	LOW	.	2.04939e-06	2.23e-06	-1.80606e-07
RFX3	9:3344821	rs753388134	T/C	.	0.000109123	intron_variant	MODIFIER	.	2.0493e-06	2.23e-06	-1.80699e-07
RFX3	9:3323939	rs888492888	C/G	.	0.000218245	intron_variant	MODIFIER	.	2.04464e-06	2.23e-06	-1.85357e-07
RFX3	9:3262956	rs375489257	C/A	R	0.000109123	synonymous_variant	LOW	.	2.04257e-06	2.23e-06	-1.87426e-07
RFX3	9:3293343	rs745694515	C/A	.	0.000218579	intron_variant	MODIFIER	.	2.0403e-06	2.23e-06	-1.89696e-07
RFX3	9:3293267	rs372995216	G/A	.	0.000109123	intron_variant	MODIFIER	.	2.0385e-06	2.23e-06	-1.91502e-07
RFX3	9:3248035	rs142365736	A/G	G	0.000654736	synonymous_variant	LOW	.	2.03627e-06	2.23e-06	-1.93733e-07
RFX3	9:3263115	rs1035953007	C/T	.	0.000109123	intron_variant	MODIFIER	.	2.03547e-06	2.23e-06	-1.94531e-07
RFX3	9:3277493	.	G/A	.	0.000109123	intron_variant	MODIFIER	.	2.03356e-06	2.23e-06	-1.96438e-07
RFX3	9:3263132	.	A/G	.	0.000109123	intron_variant	MODIFIER	.	2.02953e-06	2.23e-06	-2.00468e-07
RFX3	9:3293354	.	A/G	.	0.000109457	intron_variant	MODIFIER	.	2.02888e-06	2.23e-06	-2.0112e-07
RFX3	9:3228782	.	C/T	.	0.000109146	intron_variant	MODIFIER	.	2.02729e-06	2.23e-06	-2.02711e-07
RFX3	9:3257216	rs377062522	G/GAAAGA	.	0.000436491	intron_variant	MODIFIER	.	2.02292e-06	2.23e-06	-2.0708e-07
RFX3	9:3277518	rs1045673376	G/A	.	0.000109123	intron_variant	MODIFIER	.	2.01663e-06	2.23e-06	-2.13374e-07
RFX3	9:3395409	rs1057501544	A/G	.	0.000109123	intron_variant	MODIFIER	.	2.01399e-06	2.23e-06	-2.16008e-07
RFX3	9:3271106	rs780468867	T/C	V/I	0.000218245	missense_variant	MODERATE	benign(0.003)	2.0111e-06	2.23e-06	-2.18899e-07
RFX3	9:3257191	rs201689651	C/A	A	0.000218245	synonymous_variant	LOW	.	2.01036e-06	2.23e-06	-2.19642e-07
RFX3	9:3344830	rs76210876	A/G	.	0.00229158	intron_variant	MODIFIER	.	2.0095e-06	2.23e-06	-2.20504e-07
RFX3	9:3301707	rs2991299	G/T	.	0.000328012	intron_variant	MODIFIER	.	2.00925e-06	2.23e-06	-2.20753e-07
RFX3	9:3346841	rs143079129	T/G	.	0.000982104	intron_variant	MODIFIER	.	2.00227e-06	2.23e-06	-2.27727e-07
RFX3	9:3346688	rs147727764	C/G	T/S	0.000109123	missense_variant	MODERATE	benign(0.034)	2.00165e-06	2.23e-06	-2.28346e-07
RFX3	9:3225225	.	T/C	E	0.000109123	synonymous_variant	LOW	.	1.99434e-06	2.23e-06	-2.35659e-07
RFX3	9:3257276	.	A/T	.	0.000109218	intron_variant	MODIFIER	.	1.99289e-06	2.23e-06	-2.37109e-07
RFX3	9:3275668	.	G/A	.	0.000109218	intron_variant	MODIFIER	.	1.99036e-06	2.23e-06	-2.39635e-07
RFX3	9:3263037	.	A/C	S	0.000109123	synonymous_variant	LOW	.	1.98848e-06	2.23e-06	-2.41524e-07
RFX3	9:3248000	rs145230544	T/C	.	0.000109123	intron_variant	MODIFIER	.	1.98813e-06	2.23e-06	-2.41874e-07
RFX3	9:3270471	COSM1461993&COSM1461994	A/G	C	0.000218245	synonymous_variant	LOW	.	1.98247e-06	2.23e-06	-2.47527e-07
RFX3	9:3395436	rs367725356	C/G	.	0.000327368	intron_variant	MODIFIER	.	1.98114e-06	2.23e-06	-2.48857e-07
RFX3	9:3248111	COSM3906807&COSM3906808&COSM3906809	C/T	Y/C	0.000109123	missense_variant	MODERATE	benign(0.354)	1.97742e-06	2.23e-06	-2.52582e-07
RFX3	9:3262868	rs758007554	G/T	.	0.000982104	intron_variant	MODIFIER	.	1.97704e-06	2.23e-06	-2.52958e-07
RFX3	9:3271188	.	T/A	.	0.000109123	intron_variant	MODIFIER	.	1.96832e-06	2.23e-06	-2.61682e-07
RFX3	9:3271193	.	C/A	.	0.00010917	intron_variant	MODIFIER	.	1.96831e-06	2.23e-06	-2.61695e-07
RFX3	9:3271210	.	T/A	.	0.000109194	intron_variant	MODIFIER	.	1.9683e-06	2.23e-06	-2.61704e-07
RFX3	9:3228787	.	G/T	.	0.000109146	intron_variant	MODIFIER	.	1.96322e-06	2.23e-06	-2.66781e-07
RFX3	9:3266362	.	C/T	.	0.000218675	intron_variant	MODIFIER	.	1.96132e-06	2.23e-06	-2.68676e-07
RFX3	9:3330526	rs183273476	T/G	.	0.000436491	intron_variant	MODIFIER	.	1.96127e-06	2.23e-06	-2.68727e-07
RFX3	9:3228872	rs143063796	A/G	A	0.000109123	synonymous_variant	LOW	.	1.95967e-06	2.23e-06	-2.70331e-07
RFX3	9:3257026	rs145551511	A/G	A	0.000109123	synonymous_variant	LOW	.	1.95826e-06	2.23e-06	-2.71745e-07
RFX3	9:3344872	rs536749356	T/G	.	0.000327368	intron_variant	MODIFIER	.	1.95648e-06	2.23e-06	-2.73521e-07
RFX3	9:3323899	rs187042662	C/T	.	0.000327368	intron_variant	MODIFIER	.	1.94302e-06	2.23e-06	-2.86984e-07
RFX3	9:3248215	.	T/C	.	0.000109146	intron_variant	MODIFIER	.	1.9378e-06	2.23e-06	-2.92199e-07
RFX3	9:3228943	.	TGTACATTTTAAGA/T	.	0.000109123	intron_variant	MODIFIER	.	1.93702e-06	2.23e-06	-2.92976e-07
RFX3	9:3271192	rs555789942	T/C	.	0.000109146	intron_variant	MODIFIER	.	1.93661e-06	2.23e-06	-2.93385e-07
RFX3	9:3247843	rs373757953	G/A	.	0.000109123	intron_variant	MODIFIER	.	1.92946e-06	2.23e-06	-3.00544e-07
RFX3	9:3228804	rs745660129	C/A	.	0.000109123	intron_variant	MODIFIER	.	1.92935e-06	2.23e-06	-3.00645e-07
RFX3	9:3271205	.	T/G	.	0.000218388	intron_variant	MODIFIER	.	1.90295e-06	2.23e-06	-3.27055e-07
RFX3	9:3395639	rs189934542	A/C	.	0.000327368	intron_variant	MODIFIER	.	1.89717e-06	2.23e-06	-3.32832e-07
RFX3	9:3288151	rs748119365	C/T	Q	0.000109123	synonymous_variant	LOW	.	1.89478e-06	2.23e-06	-3.35217e-07
RFX3	9:3288075	rs71506632	G/C	.	0.00109123	intron_variant	MODIFIER	.	1.8875e-06	2.23e-06	-3.42505e-07
RFX3	9:3263040	rs367839244	T/C	T	0.000109123	synonymous_variant	LOW	.	1.8839e-06	2.23e-06	-3.46105e-07
RFX3	9:3301525	rs201982588	T/C	.	0.000327368	intron_variant	MODIFIER	.	1.88215e-06	2.23e-06	-3.47852e-07
RFX3	9:3247972	rs144215421	C/G	.	0.000545613	intron_variant	MODIFIER	.	1.87728e-06	2.23e-06	-3.52723e-07
RFX3	9:3257279	.	T/A	.	0.000109314	intron_variant	MODIFIER	.	1.87654e-06	2.23e-06	-3.53457e-07
RFX3	9:3277294	.	C/T	.	0.000218245	intron_variant	MODIFIER	.	1.85249e-06	2.23e-06	-3.77512e-07
RFX3	9:3225104	rs137899630&COSM3413586	T/C	V/I	0.00120035	missense_variant	MODERATE	benign(0.015)	1.84985e-06	2.23e-06	-3.80152e-07
RFX3	9:3293042	rs117666187	C/G	.	0.00491052	intron_variant	MODIFIER	.	1.82543e-06	2.23e-06	-4.0457e-07
RFX3	9:3225007	rs191410846	C/T	.	0.000218245	3_prime_UTR_variant	MODIFIER	.	1.8253e-06	2.23e-06	-4.04702e-07
RFX3	9:3270353	rs762956176	T/C	.	0.000218245	intron_variant	MODIFIER	.	1.81752e-06	2.23e-06	-4.12478e-07
RFX3	9:3277408	.	T/C	G/D	0.000109123	missense_variant	MODERATE	benign(0.013)	1.77462e-06	2.23e-06	-4.55376e-07
RFX3	9:3247768	rs76378105	C/T	.	0.00174596	intron_variant	MODIFIER	.	1.59408e-06	2.23e-06	-6.35917e-07
RFX3	9:3293275	rs763678501	T/C	.	0.000218245	intron_variant	MODIFIER	.	1.59205e-06	2.23e-06	-6.37952e-07
RFX3	9:3270298	rs114165896	C/T	.	0.00141859	intron_variant	MODIFIER	.	1.59188e-06	2.23e-06	-6.3812e-07
RFX3	9:3346623	.	C/T	.	0.000109123	intron_variant	MODIFIER	.	1.57022e-06	2.23e-06	-6.59776e-07
RFX3	9:3346624	.	T/C	.	0.000109123	intron_variant	MODIFIER	.	1.57022e-06	2.23e-06	-6.59776e-07
RFX3	9:3228838	rs149980652	A/G	.	0.0091663	intron_variant	MODIFIER	.	1.56982e-06	2.23e-06	-6.60184e-07
RFX3	9:3344844	rs115237978	A/T	.	0.00130947	intron_variant	MODIFIER	.	1.56176e-06	2.23e-06	-6.68242e-07
RFX3	9:3344953	rs7850705	C/A	.	0.00131033	intron_variant	MODIFIER	.	1.56149e-06	2.23e-06	-6.68515e-07
RFX3	9:3292982	rs114432305	A/T	.	0.00120192	intron_variant	MODIFIER	.	1.55872e-06	2.23e-06	-6.71277e-07
RFX3	9:3263116	rs367890793	A/G	.	0.000109123	intron_variant	MODIFIER	.	1.55237e-06	2.23e-06	-6.77629e-07
RFX3	9:3395678	rs148570808	C/A	.	0.00164582	intron_variant	MODIFIER	.	1.52753e-06	2.23e-06	-7.02471e-07
RFX3	9:3346849	rs77016743	T/C	.	0.0120035	intron_variant	MODIFIER	.	1.27356e-06	2.23e-06	-9.56438e-07

## Sheet: Table9 - ATP8A1 Pdiff
Supplementary Table 9. The Pdiff values for all rare loci in ATP8A1 gene
Gene	chrpos	Existing_variation	alt_ref	Amino_acids	MAF	Consequence	VEP IMPACT	PolyPhen	Prm	Porig	Prm - Porig
ATP8A1	4:42423593	rs377196430	A/G	.	0.00185509	intron_variant	MODIFIER	.	3.81855e-05	7.17e-06	3.10155e-05
ATP8A1	4:42522386	rs1037582917	C/T	.	0.000438404	intron_variant	MODIFIER	.	2.35145e-05	7.17e-06	1.63445e-05
ATP8A1	4:42600432	rs56302630	T/C	.	0.000218245	intron_variant	MODIFIER	.	1.5351e-05	7.17e-06	8.18098e-06
ATP8A1	4:42590777	rs73810727	G/A	.	0.000218245	intron_variant	MODIFIER	.	1.5351e-05	7.17e-06	8.18098e-06
ATP8A1	4:42588287	TMP_ESP_4_42590305_42590305	A/AT	D/X	0.000109123	frameshift_variant	HIGH	.	1.51958e-05	7.17e-06	8.02581e-06
ATP8A1	4:42575678	rs553922327	A/G	P/S	0.000109123	missense_variant	MODERATE	benign(0.065)	1.45825e-05	7.17e-06	7.41248e-06
ATP8A1	4:42414667	rs961248505	T/C	V	0.000109123	synonymous_variant	LOW	.	1.45707e-05	7.17e-06	7.40072e-06
ATP8A1	4:42552447	rs757973498	C/CTT	.	0.000109123	intron_variant	MODIFIER	.	1.44506e-05	7.17e-06	7.28063e-06
ATP8A1	4:42579864	.	T/C	A/T	0.000109123	missense_variant	MODERATE	benign(0.014)	1.4427e-05	7.17e-06	7.25704e-06
ATP8A1	4:42578478	.	T/C	.	0.000109194	intron_variant	MODIFIER	.	1.43963e-05	7.17e-06	7.22628e-06
ATP8A1	4:42586249	.	C/T	.	0.00010929	intron_variant	MODIFIER	.	1.41932e-05	7.17e-06	7.02318e-06
ATP8A1	4:42600593	rs531248597	C/T	.	0.000109146	intron_variant	MODIFIER	.	1.41315e-05	7.17e-06	6.96151e-06
ATP8A1	4:42588391	.	C/T	.	0.000109146	intron_variant	MODIFIER	.	1.40843e-05	7.17e-06	6.91428e-06
ATP8A1	4:42586384	rs142811883	A/G	Y	0.000109146	synonymous_variant	LOW	.	1.40701e-05	7.17e-06	6.90011e-06
ATP8A1	4:42485496	rs374740812	T/C	R/Q	0.000109146	missense_variant&splice_region_variant	MODERATE	probably_damaging(1)	1.40257e-05	7.17e-06	6.8557e-06
ATP8A1	4:42569078	rs923190752	G/A	.	0.000109123	intron_variant	MODIFIER	.	1.38089e-05	7.17e-06	6.63887e-06
ATP8A1	4:42588393	rs949272775	C/T	.	0.000109146	intron_variant	MODIFIER	.	1.33739e-05	7.17e-06	6.20387e-06
ATP8A1	4:42615959	.	C/T	.	0.000109218	intron_variant	MODIFIER	.	1.31515e-05	7.17e-06	5.98148e-06
ATP8A1	4:42485617	rs370223580&COSM1184146&COSM1184145	A/G	R/W	0.000109123	missense_variant	MODERATE	possibly_damaging(0.788)	1.30894e-05	7.17e-06	5.91936e-06
ATP8A1	4:42455466	rs141738340	C/T	.	0.000109123	intron_variant	MODIFIER	.	1.28795e-05	7.17e-06	5.70946e-06
ATP8A1	4:42616177	.	C/A	.	0.000109697	intron_variant	MODIFIER	.	1.26254e-05	7.17e-06	5.45541e-06
ATP8A1	4:42556104	.	A/AAT	.	0.000109146	intron_variant	MODIFIER	.	1.2577e-05	7.17e-06	5.40699e-06
ATP8A1	4:42556118	.	A/G	.	0.000109194	intron_variant	MODIFIER	.	1.25762e-05	7.17e-06	5.4062e-06
ATP8A1	4:42575733	rs753073075	T/C	.	0.000109146	intron_variant	MODIFIER	.	1.25364e-05	7.17e-06	5.36637e-06
ATP8A1	4:42575562	.	T/G	.	0.000109123	intron_variant	MODIFIER	.	1.25148e-05	7.17e-06	5.3448e-06
ATP8A1	4:42464636	.	C/T	.	0.000218245	intron_variant	MODIFIER	.	1.24967e-05	7.17e-06	5.32674e-06
ATP8A1	4:42625697	rs147391791	G/T	I/L	0.000109123	missense_variant	MODERATE	benign(0)	1.2117e-05	7.17e-06	4.94697e-06
ATP8A1	4:42590914	.	A/T	.	0.000218579	intron_variant	MODIFIER	.	1.19901e-05	7.17e-06	4.82005e-06
ATP8A1	4:42625763	rs757401390	T/C	.	0.000218245	intron_variant	MODIFIER	.	1.19732e-05	7.17e-06	4.8032e-06
ATP8A1	4:42586383	COSM3603994&COSM3603993	T/C	D/N	0.000109146	missense_variant	MODERATE	benign(0.037)	1.16248e-05	7.17e-06	4.45482e-06
ATP8A1	4:42507084	rs3792687	A/G	T/M	0.000218245	missense_variant	MODERATE	probably_damaging(0.973)	1.07366e-05	7.17e-06	3.56664e-06
ATP8A1	4:42414758	.	A/T	.	0.000109123	intron_variant	MODIFIER	.	1.05975e-05	7.17e-06	3.42755e-06
ATP8A1	4:42626944	rs766800856	A/AC	.	0.00109123	intron_variant	MODIFIER	.	1.03714e-05	7.17e-06	3.20144e-06
ATP8A1	4:42574601	.	C/T	.	0.000109123	intron_variant	MODIFIER	.	1.0278e-05	7.17e-06	3.10796e-06
ATP8A1	4:42423676	rs750206508	G/A	F	0.000327368	synonymous_variant	LOW	.	1.01734e-05	7.17e-06	3.00335e-06
ATP8A1	4:42446569	rs754249806	A/C	.	0.000109123	intron_variant	MODIFIER	.	1.01006e-05	7.17e-06	2.93057e-06
ATP8A1	4:42443773	.	T/TC	.	0.000110011	intron_variant	MODIFIER	.	9.95296e-06	7.17e-06	2.78296e-06
ATP8A1	4:42443704	rs752040758	C/T	.	0.000545613	intron_variant	MODIFIER	.	9.79089e-06	7.17e-06	2.62089e-06
ATP8A1	4:42569150	rs201941749	G/A	.	0.000982104	intron_variant	MODIFIER	.	9.30878e-06	7.17e-06	2.13878e-06
ATP8A1	4:42588161	rs181582699	C/T	.	0.00742845	intron_variant	MODIFIER	.	9.17617e-06	7.17e-06	2.00617e-06
ATP8A1	4:42543870	rs771738154	A/T	.	0.000219443	intron_variant	MODIFIER	.	9.1051e-06	7.17e-06	1.9351e-06
ATP8A1	4:42556095	.	CTTT/C	.	0.000218245	intron_variant	MODIFIER	.	8.92951e-06	7.17e-06	1.75951e-06
ATP8A1	4:42552698	rs73165786	C/T	.	0.000660793	intron_variant	MODIFIER	.	8.83462e-06	7.17e-06	1.66462e-06
ATP8A1	4:42544078	.	T/A	.	0.000109218	intron_variant	MODIFIER	.	8.78746e-06	7.17e-06	1.61746e-06
ATP8A1	4:42544080	.	T/A	.	0.000109266	intron_variant	MODIFIER	.	8.78696e-06	7.17e-06	1.61696e-06
ATP8A1	4:42575729	.	G/A	.	0.000436586	intron_variant	MODIFIER	.	8.68437e-06	7.17e-06	1.51437e-06
ATP8A1	4:42590890	rs201326642	T/C	.	0.000327439	splice_region_variant&intron_variant	LOW	.	8.64717e-06	7.17e-06	1.47717e-06
ATP8A1	4:42455331	rs74414963	C/T	K/R	0.0206242	missense_variant	MODERATE	benign(0.007)	8.61746e-06	7.17e-06	1.44746e-06
ATP8A1	4:42590939	rs1011272683	GA/G	.	0.000437254	intron_variant	MODIFIER	.	8.52115e-06	7.17e-06	1.35115e-06
ATP8A1	4:42590978	rs138904361	A/C	.	0.00285777	intron_variant	MODIFIER	.	8.43186e-06	7.17e-06	1.26186e-06
ATP8A1	4:42452095	rs147112832	A/G	.	0.00884086	intron_variant	MODIFIER	.	8.17168e-06	7.17e-06	1.00168e-06
ATP8A1	4:42625805	rs547347870	C/T	.	0.000218627	intron_variant	MODIFIER	.	7.92211e-06	7.17e-06	7.52114e-07
ATP8A1	4:42443590	rs140420171&COSM1184148&COSM1184147	A/G	P/L	0.000436491	missense_variant	MODERATE	benign(0.284)	7.6144e-06	7.17e-06	4.44397e-07
ATP8A1	4:42544011	rs79971589	C/T	.	0.00130976	intron_variant	MODIFIER	.	7.56096e-06	7.17e-06	3.90957e-07
ATP8A1	4:42548950	rs77698406	A/G	.	0.00130976	intron_variant	MODIFIER	.	7.55999e-06	7.17e-06	3.89985e-07
ATP8A1	4:42423545	rs143412392	A/T	.	0.00327368	intron_variant	MODIFIER	.	7.32417e-06	7.17e-06	1.54166e-07
ATP8A1	4:42615982	rs377758726	C/T	.	0.000109218	intron_variant	MODIFIER	.	7.1186e-06	7.17e-06	-5.14026e-08
ATP8A1	4:42656885	rs112235862	A/C	.	0.0227124	5_prime_UTR_variant	MODIFIER	.	7.11499e-06	7.17e-06	-5.50095e-08
ATP8A1	4:42548935	rs182640801	A/C	.	0.00010917	intron_variant	MODIFIER	.	7.10312e-06	7.17e-06	-6.68754e-08
ATP8A1	4:42600397	.	C/A	.	0.000109123	intron_variant	MODIFIER	.	7.08496e-06	7.17e-06	-8.50413e-08
ATP8A1	4:42574743	rs114801500	C/A	.	0.000327368	intron_variant	MODIFIER	.	7.08418e-06	7.17e-06	-8.58177e-08
ATP8A1	4:42507234	.	C/T	.	0.000109673	intron_variant	MODIFIER	.	7.08336e-06	7.17e-06	-8.66418e-08
ATP8A1	4:42465163	rs78903506	A/G	.	0.00010917	intron_variant	MODIFIER	.	7.0704e-06	7.17e-06	-9.96029e-08
ATP8A1	4:42444515	rs16854376	G/A	.	0.000327368	intron_variant	MODIFIER	.	7.04943e-06	7.17e-06	-1.20575e-07
ATP8A1	4:42556101	.	A/G	.	0.000327439	intron_variant	MODIFIER	.	7.04662e-06	7.17e-06	-1.23384e-07
ATP8A1	4:42507083	rs201201463	T/C	T	0.000109123	synonymous_variant	LOW	.	7.03061e-06	7.17e-06	-1.3939e-07
ATP8A1	4:42556049	rs554727072	T/G	.	0.000545613	intron_variant	MODIFIER	.	7.029e-06	7.17e-06	-1.41002e-07
ATP8A1	4:42579882	.	A/C	V/F	0.000109123	missense_variant	MODERATE	benign(0.05)	7.02753e-06	7.17e-06	-1.42469e-07
ATP8A1	4:42575594	.	T/C	.	0.000109123	intron_variant	MODIFIER	.	7.01978e-06	7.17e-06	-1.50221e-07
ATP8A1	4:42522202	rs956862653	A/G	N	0.000109123	synonymous_variant	LOW	.	7.01151e-06	7.17e-06	-1.58488e-07
ATP8A1	4:42413065	rs765147872	A/G	.	0.000109123	intron_variant	MODIFIER	.	7.00819e-06	7.17e-06	-1.61807e-07
ATP8A1	4:42551318	.	A/G	.	0.000109123	intron_variant	MODIFIER	.	6.98636e-06	7.17e-06	-1.83641e-07
ATP8A1	4:42625541	.	C/T	.	0.000109123	intron_variant	MODIFIER	.	6.98514e-06	7.17e-06	-1.84855e-07
ATP8A1	4:42600573	.	C/T	.	0.000109146	intron_variant	MODIFIER	.	6.98029e-06	7.17e-06	-1.89709e-07
ATP8A1	4:42503413	rs567652036	G/T	.	0.000109123	intron_variant	MODIFIER	.	6.97713e-06	7.17e-06	-1.92869e-07
ATP8A1	4:42506953	rs537343737	T/C	.	0.000109146	intron_variant	MODIFIER	.	6.97261e-06	7.17e-06	-1.97394e-07
ATP8A1	4:42413059	rs191567705	G/A	.	0.000109123	intron_variant	MODIFIER	.	6.97194e-06	7.17e-06	-1.98062e-07
ATP8A1	4:42600598	rs947276665	T/C	.	0.00010917	intron_variant	MODIFIER	.	6.9701e-06	7.17e-06	-1.999e-07
ATP8A1	4:42552677	.	AC/A	.	0.000109146	intron_variant	MODIFIER	.	6.96948e-06	7.17e-06	-2.00516e-07
ATP8A1	4:42543957	rs556457468	T/C	R/H	0.000218245	missense_variant	MODERATE	probably_damaging(0.993)	6.9566e-06	7.17e-06	-2.13397e-07
ATP8A1	4:42414570	.	T/G	.	0.000109146	intron_variant	MODIFIER	.	6.95525e-06	7.17e-06	-2.14749e-07
ATP8A1	4:42569099	rs933240028	C/A	.	0.000109123	intron_variant	MODIFIER	.	6.95424e-06	7.17e-06	-2.1576e-07
ATP8A1	4:42581771	rs757515021	C/T	.	0.000109123	intron_variant	MODIFIER	.	6.95367e-06	7.17e-06	-2.16327e-07
ATP8A1	4:42586556	.	T/C	.	0.000109649	intron_variant	MODIFIER	.	6.9532e-06	7.17e-06	-2.16801e-07
ATP8A1	4:42422954	.	A/C	.	0.000109553	intron_variant	MODIFIER	.	6.95174e-06	7.17e-06	-2.18258e-07
ATP8A1	4:42543906	.	C/T	.	0.00010917	intron_variant	MODIFIER	.	6.94539e-06	7.17e-06	-2.24606e-07
ATP8A1	4:42624559	.	C/T	I/V	0.000109123	missense_variant	MODERATE	benign(0.019)	6.94074e-06	7.17e-06	-2.29264e-07
ATP8A1	4:42578240	rs776933336	T/C	.	0.000109123	intron_variant	MODIFIER	.	6.93703e-06	7.17e-06	-2.32972e-07
ATP8A1	4:42575543	rs144784681	A/G	.	0.000109123	intron_variant	MODIFIER	.	6.92312e-06	7.17e-06	-2.46883e-07
ATP8A1	4:42524740	.	T/C	.	0.000109218	intron_variant	MODIFIER	.	6.9218e-06	7.17e-06	-2.48201e-07
ATP8A1	4:42578379	rs750522059	T/C	A/T	0.000109123	missense_variant	MODERATE	benign(0.019)	6.9215e-06	7.17e-06	-2.48501e-07
ATP8A1	4:42455528	rs61735691	A/G	N	0.0452859	synonymous_variant	LOW	.	6.9158e-06	7.17e-06	-2.54203e-07
ATP8A1	4:42444733	rs150403408	G/A	.	0.000328443	intron_variant	MODIFIER	.	6.91064e-06	7.17e-06	-2.5936e-07
ATP8A1	4:42455692	.	G/C	.	0.00010917	intron_variant	MODIFIER	.	6.90917e-06	7.17e-06	-2.60827e-07
ATP8A1	4:42422744	rs779304217	G/A	.	0.000109123	intron_variant	MODIFIER	.	6.90252e-06	7.17e-06	-2.67476e-07
ATP8A1	4:42465023	rs752128867	C/T	K/R	0.000109123	missense_variant	MODERATE	benign(0.057)	6.90054e-06	7.17e-06	-2.69461e-07
ATP8A1	4:42548931	rs560602543	C/CT	.	0.000873362	intron_variant	MODIFIER	.	6.89827e-06	7.17e-06	-2.71731e-07
ATP8A1	4:42575552	rs201381490	AT/A	.	0.000327439	intron_variant	MODIFIER	.	6.89814e-06	7.17e-06	-2.71864e-07
ATP8A1	4:42578205	rs111964223	C/T	.	0.000327582	intron_variant	MODIFIER	.	6.89795e-06	7.17e-06	-2.72048e-07
ATP8A1	4:42575760	.	A/T	.	0.000109146	intron_variant	MODIFIER	.	6.89436e-06	7.17e-06	-2.75644e-07
ATP8A1	4:42522187	rs770450885&COSM4124792&COSM4124791	C/G	L	0.000109123	synonymous_variant	LOW	.	6.89274e-06	7.17e-06	-2.77259e-07
ATP8A1	4:42616131	rs149382464	C/A	.	0.000437158	intron_variant	MODIFIER	.	6.89014e-06	7.17e-06	-2.79857e-07
ATP8A1	4:42455262	.	A/AC	.	0.000109123	intron_variant	MODIFIER	.	6.88693e-06	7.17e-06	-2.83068e-07
ATP8A1	4:42590979	.	A/G	.	0.000109842	intron_variant	MODIFIER	.	6.87706e-06	7.17e-06	-2.92942e-07
ATP8A1	4:42624498	rs773261988	T/C	.	0.000109123	intron_variant	MODIFIER	.	6.87402e-06	7.17e-06	-2.95979e-07
ATP8A1	4:42522169	rs147215077	T/C	L	0.000109123	synonymous_variant	LOW	.	6.87033e-06	7.17e-06	-2.99673e-07
ATP8A1	4:42451986	.	C/T	Q/R	0.000109123	missense_variant	MODERATE	benign(0.005)	6.87033e-06	7.17e-06	-2.99673e-07
ATP8A1	4:42422734	.	T/C	.	0.000109146	intron_variant	MODIFIER	.	6.86252e-06	7.17e-06	-3.07484e-07
ATP8A1	4:42444486	.	T/C	.	0.000109146	intron_variant	MODIFIER	.	6.86246e-06	7.17e-06	-3.07542e-07
ATP8A1	4:42656732	rs114952463	A/T	.	0.000545613	intron_variant	MODIFIER	.	6.86198e-06	7.17e-06	-3.08025e-07
ATP8A1	4:42503604	rs572195299	G/A	.	0.00010917	intron_variant	MODIFIER	.	6.8605e-06	7.17e-06	-3.09501e-07
ATP8A1	4:42443717	rs41265687	A/G	.	0.0317547	intron_variant	MODIFIER	.	6.85963e-06	7.17e-06	-3.10369e-07
ATP8A1	4:42588422	.	A/C	.	0.000109266	intron_variant	MODIFIER	.	6.85882e-06	7.17e-06	-3.11179e-07
ATP8A1	4:42594220	.	T/A	.	0.000109146	intron_variant	MODIFIER	.	6.85428e-06	7.17e-06	-3.15722e-07
ATP8A1	4:42422943	rs201994442	A/T	.	0.000109553	intron_variant	MODIFIER	.	6.8542e-06	7.17e-06	-3.15797e-07
ATP8A1	4:42578417	rs200997614	G/T	.	0.0030561	intron_variant	MODIFIER	.	6.85122e-06	7.17e-06	-3.18779e-07
ATP8A1	4:42507191	rs555427292	T/C	.	0.000218436	intron_variant	MODIFIER	.	6.85038e-06	7.17e-06	-3.19617e-07
ATP8A1	4:42616128	.	T/C	.	0.000109218	intron_variant	MODIFIER	.	6.83958e-06	7.17e-06	-3.30418e-07
ATP8A1	4:42578163	rs1034683236	A/G	.	0.000109625	intron_variant	MODIFIER	.	6.83344e-06	7.17e-06	-3.36562e-07
ATP8A1	4:42423652	rs200613613	G/A	P	0.000109123	synonymous_variant	LOW	.	6.83022e-06	7.17e-06	-3.39778e-07
ATP8A1	4:42600586	.	C/A	.	0.000109146	intron_variant	MODIFIER	.	6.82898e-06	7.17e-06	-3.41024e-07
ATP8A1	4:42600612	.	A/C	.	0.000109146	intron_variant	MODIFIER	.	6.8277e-06	7.17e-06	-3.42295e-07
ATP8A1	4:42446504	rs147384560	A/G	.	0.000109123	intron_variant	MODIFIER	.	6.82454e-06	7.17e-06	-3.45458e-07
ATP8A1	4:42579992	rs868051253	T/C	.	0.000109123	intron_variant	MODIFIER	.	6.82347e-06	7.17e-06	-3.46533e-07
ATP8A1	4:42551373	rs866873234	T/TTTAA	.	0.000218436	intron_variant	MODIFIER	.	6.81888e-06	7.17e-06	-3.51119e-07
ATP8A1	4:42656756	rs972832153	A/AAC	.	0.000109123	intron_variant	MODIFIER	.	6.81604e-06	7.17e-06	-3.53957e-07
ATP8A1	4:42465021	.	A/C	V/F	0.000109123	missense_variant	MODERATE	benign(0.144)	6.81526e-06	7.17e-06	-3.54739e-07
ATP8A1	4:42451913	rs568481331	C/T	.	0.000109123	intron_variant	MODIFIER	.	6.81433e-06	7.17e-06	-3.55666e-07
ATP8A1	4:42656852	rs947958934	A/C	V/L	0.000109123	missense_variant	MODERATE	benign(0)	6.8089e-06	7.17e-06	-3.61103e-07
ATP8A1	4:42422909	rs754333686&TMP_ESP_4_42424927_42424928	G/GA	.	0.000874126	intron_variant	MODIFIER	.	6.80801e-06	7.17e-06	-3.61986e-07
ATP8A1	4:42444590	rs755055422	C/T	S	0.000109123	synonymous_variant	LOW	.	6.80729e-06	7.17e-06	-3.62706e-07
ATP8A1	4:42507226	.	T/G	.	0.000109625	intron_variant	MODIFIER	.	6.80729e-06	7.17e-06	-3.62712e-07
ATP8A1	4:42552532	.	C/T	K/E	0.000109123	missense_variant	MODERATE	benign(0.006)	6.80714e-06	7.17e-06	-3.62859e-07
ATP8A1	4:42455459	.	A/T	.	0.000109123	intron_variant	MODIFIER	.	6.80069e-06	7.17e-06	-3.69307e-07
ATP8A1	4:42588232	rs377228497	C/T	.	0.000109146	intron_variant	MODIFIER	.	6.79699e-06	7.17e-06	-3.73009e-07
ATP8A1	4:42578383	rs748086966	G/A	G	0.000109123	synonymous_variant	LOW	.	6.79598e-06	7.17e-06	-3.7402e-07
ATP8A1	4:42414626	rs778155403	T/C	.	0.000109123	splice_donor_variant	HIGH	.	6.79129e-06	7.17e-06	-3.78709e-07
ATP8A1	4:42574638	rs138169536	C/T	I/V	0.0033828	missense_variant	MODERATE	benign(0.045)	6.78344e-06	7.17e-06	-3.86563e-07
ATP8A1	4:42625524	.	T/C	.	0.000109123	intron_variant	MODIFIER	.	6.77949e-06	7.17e-06	-3.90506e-07
ATP8A1	4:42575792	rs147958016	G/A	.	0.000109123	intron_variant	MODIFIER	.	6.77631e-06	7.17e-06	-3.93686e-07
ATP8A1	4:42507192	rs201069390	A/G	.	0.000218484	intron_variant	MODIFIER	.	6.77134e-06	7.17e-06	-3.9866e-07
ATP8A1	4:42485547	rs752026708	G/C	R/P	0.000109123	missense_variant	MODERATE	probably_damaging(0.992)	6.76263e-06	7.17e-06	-4.07372e-07
ATP8A1	4:42600527	rs952286209	G/A	.	0.000109123	intron_variant	MODIFIER	.	6.75674e-06	7.17e-06	-4.13257e-07
ATP8A1	4:42594205	.	A/T	.	0.00010917	intron_variant	MODIFIER	.	6.75614e-06	7.17e-06	-4.13861e-07
ATP8A1	4:42524704	.	G/A	.	0.000109505	intron_variant	MODIFIER	.	6.75296e-06	7.17e-06	-4.17043e-07
ATP8A1	4:42627027	.	C/G	P	0.000109123	synonymous_variant	LOW	.	6.75286e-06	7.17e-06	-4.17141e-07
ATP8A1	4:42543936	rs147389955&COSM299073&COSM299072	T/C	R/Q	0.000109123	missense_variant	MODERATE	possibly_damaging(0.862)	6.75277e-06	7.17e-06	-4.17232e-07
ATP8A1	4:42578410	rs759040961	T/C	.	0.000109146	intron_variant	MODIFIER	.	6.74222e-06	7.17e-06	-4.27784e-07
ATP8A1	4:42627156	rs752408144	A/G	.	0.000109123	intron_variant	MODIFIER	.	6.73855e-06	7.17e-06	-4.31452e-07
ATP8A1	4:42600446	rs370779541	C/T	.	0.000218245	intron_variant	MODIFIER	.	6.73537e-06	7.17e-06	-4.34627e-07
ATP8A1	4:42590941	rs900448238	T/A	.	0.000218627	intron_variant	MODIFIER	.	6.72217e-06	7.17e-06	-4.47827e-07
ATP8A1	4:42446634	rs768401911	G/A	F	0.000109123	synonymous_variant	LOW	.	6.71898e-06	7.17e-06	-4.51019e-07
ATP8A1	4:42422763	rs776137583	C/T	.	0.000218293	intron_variant	MODIFIER	.	6.71794e-06	7.17e-06	-4.52056e-07
ATP8A1	4:42522323	.	T/C	.	0.000109123	intron_variant	MODIFIER	.	6.71356e-06	7.17e-06	-4.56439e-07
ATP8A1	4:42578162	rs111490208	T/C	.	0.000548005	intron_variant	MODIFIER	.	6.71237e-06	7.17e-06	-4.57632e-07
ATP8A1	4:42522060	rs145763678	GAA/G	.	0.000436586	intron_variant	MODIFIER	.	6.71156e-06	7.17e-06	-4.58443e-07
ATP8A1	4:42464620	rs111985044	A/G	.	0.000218245	intron_variant	MODIFIER	.	6.7062e-06	7.17e-06	-4.63805e-07
ATP8A1	4:42485742	rs116566719	C/T	.	0.00076486	intron_variant	MODIFIER	.	6.70487e-06	7.17e-06	-4.65132e-07
ATP8A1	4:42555929	.	T/TA	.	0.000327368	intron_variant	MODIFIER	.	6.70018e-06	7.17e-06	-4.69816e-07
ATP8A1	4:42443642	rs754952867&COSM1184144&COSM1184143	T/C	A/T	0.000109123	missense_variant	MODERATE	benign(0.03)	6.67747e-06	7.17e-06	-4.92525e-07
ATP8A1	4:42656735	rs986969523	A/G	.	0.000109123	intron_variant	MODIFIER	.	6.67217e-06	7.17e-06	-4.97833e-07
ATP8A1	4:42586489	rs540113627	G/T	.	0.000109146	intron_variant	MODIFIER	.	6.67215e-06	7.17e-06	-4.97853e-07
ATP8A1	4:42543985	.	G/C	A/P	0.000109123	missense_variant&splice_region_variant	MODERATE	benign(0.311)	6.67206e-06	7.17e-06	-4.97941e-07
ATP8A1	4:42414768	.	A/C	.	0.000218245	intron_variant	MODIFIER	.	6.66851e-06	7.17e-06	-5.01494e-07
ATP8A1	4:42590782	rs374698723	T/C	.	0.000218245	intron_variant	MODIFIER	.	6.66358e-06	7.17e-06	-5.06424e-07
ATP8A1	4:42552665	.	A/G	.	0.00010917	intron_variant	MODIFIER	.	6.66248e-06	7.17e-06	-5.07524e-07
ATP8A1	4:42574719	.	C/T	.	0.000109123	intron_variant	MODIFIER	.	6.66102e-06	7.17e-06	-5.08981e-07
ATP8A1	4:42524665	rs111997833	T/G	.	0.000110205	intron_variant	MODIFIER	.	6.65824e-06	7.17e-06	-5.11755e-07
ATP8A1	4:42507122	rs139938498	T/C	E	0.000327439	synonymous_variant	LOW	.	6.65443e-06	7.17e-06	-5.15572e-07
ATP8A1	4:42485595	rs781101673	AG/A	L/PX	0.000109123	frameshift_variant	HIGH	.	6.64945e-06	7.17e-06	-5.20545e-07
ATP8A1	4:42627121	rs542733423	A/ATCT	.	0.00130947	intron_variant	MODIFIER	.	6.64612e-06	7.17e-06	-5.23875e-07
ATP8A1	4:42586387	.	C/G	L	0.000218293	synonymous_variant	LOW	.	6.64265e-06	7.17e-06	-5.27347e-07
ATP8A1	4:42588340	.	C/G	.	0.000109123	intron_variant	MODIFIER	.	6.6398e-06	7.17e-06	-5.30204e-07
ATP8A1	4:42600575	.	C/T	.	0.000109146	intron_variant	MODIFIER	.	6.63758e-06	7.17e-06	-5.32417e-07
ATP8A1	4:42624675	rs73166556	G/T	.	0.000764192	intron_variant	MODIFIER	.	6.62415e-06	7.17e-06	-5.45852e-07
ATP8A1	4:42503587	rs543311996	A/G	.	0.000109123	intron_variant	MODIFIER	.	6.62312e-06	7.17e-06	-5.46884e-07
ATP8A1	4:42507050	rs149361269	G/A	L	0.000218245	synonymous_variant	LOW	.	6.62273e-06	7.17e-06	-5.47265e-07
ATP8A1	4:42455612	rs200841386	C/A	.	0.000109123	intron_variant	MODIFIER	.	6.62239e-06	7.17e-06	-5.47614e-07
ATP8A1	4:42581795	.	A/C	.	0.000218293	intron_variant	MODIFIER	.	6.61983e-06	7.17e-06	-5.50168e-07
ATP8A1	4:42579889	rs768047138	A/C	M/I	0.000109123	missense_variant	MODERATE	benign(0.012)	6.61388e-06	7.17e-06	-5.5612e-07
ATP8A1	4:42586555	rs764355188	T/C	.	0.000109649	intron_variant	MODIFIER	.	6.60767e-06	7.17e-06	-5.62334e-07
ATP8A1	4:42624667	rs778206268	G/A	.	0.000109146	intron_variant	MODIFIER	.	6.60261e-06	7.17e-06	-5.67391e-07
ATP8A1	4:42556105	.	G/A	.	0.000109146	intron_variant	MODIFIER	.	6.60239e-06	7.17e-06	-5.67607e-07
ATP8A1	4:42556107	.	GAA/G	.	0.000109146	intron_variant	MODIFIER	.	6.60239e-06	7.17e-06	-5.67607e-07
ATP8A1	4:42575654	rs774297193&COSM5527169&COSM5527168	A/G	R/*	0.000109123	stop_gained	HIGH	.	6.59913e-06	7.17e-06	-5.70874e-07
ATP8A1	4:42551245	rs777753253	C/T	N/D	0.000109123	missense_variant	MODERATE	benign(0.088)	6.59282e-06	7.17e-06	-5.77176e-07
ATP8A1	4:42626905	rs754849888	A/G	.	0.000436681	intron_variant	MODIFIER	.	6.59045e-06	7.17e-06	-5.79554e-07
ATP8A1	4:42581815	rs963051303	T/C	.	0.000109194	intron_variant	MODIFIER	.	6.59038e-06	7.17e-06	-5.79619e-07
ATP8A1	4:42446716	rs892660537	G/A	.	0.000218436	intron_variant	MODIFIER	.	6.58555e-06	7.17e-06	-5.84448e-07
ATP8A1	4:42590927	rs757248685	AT/A	.	0.000218436	intron_variant	MODIFIER	.	6.58254e-06	7.17e-06	-5.87463e-07
ATP8A1	4:42569302	.	AACTTTC/A	.	0.000109146	intron_variant	MODIFIER	.	6.57895e-06	7.17e-06	-5.91051e-07
ATP8A1	4:42503603	.	C/T	.	0.00010917	intron_variant	MODIFIER	.	6.57579e-06	7.17e-06	-5.94209e-07
ATP8A1	4:42522132	.	C/T	.	0.000109123	intron_variant	MODIFIER	.	6.57433e-06	7.17e-06	-5.95675e-07
ATP8A1	4:42422939	rs1018291279	C/T	.	0.000109505	intron_variant	MODIFIER	.	6.57224e-06	7.17e-06	-5.97764e-07
ATP8A1	4:42624486	.	C/A	.	0.000218245	intron_variant	MODIFIER	.	6.57183e-06	7.17e-06	-5.98172e-07
ATP8A1	4:42594348	rs985496631	G/A	.	0.000218293	intron_variant	MODIFIER	.	6.56651e-06	7.17e-06	-6.03492e-07
ATP8A1	4:42446554	rs548801572	T/C	.	0.000218245	intron_variant	MODIFIER	.	6.55924e-06	7.17e-06	-6.10756e-07
ATP8A1	4:42616091	rs749639220	A/AG	.	0.00010917	intron_variant	MODIFIER	.	6.55705e-06	7.17e-06	-6.1295e-07
ATP8A1	4:42452057	.	ATTGTACAC/A	V/VCTX	0.000109123	frameshift_variant&splice_region_variant	HIGH	.	6.55534e-06	7.17e-06	-6.14656e-07
ATP8A1	4:42414547	rs891811066	T/TAAAGTCA	.	0.000327726	intron_variant	MODIFIER	.	6.5541e-06	7.17e-06	-6.15903e-07
ATP8A1	4:42578446	.	A/C	.	0.000109123	intron_variant	MODIFIER	.	6.54468e-06	7.17e-06	-6.25321e-07
ATP8A1	4:42627185	.	G/GA	.	0.000109266	intron_variant	MODIFIER	.	6.54366e-06	7.17e-06	-6.26343e-07
ATP8A1	4:42627187	.	T/A	.	0.000109266	intron_variant	MODIFIER	.	6.54366e-06	7.17e-06	-6.26343e-07
ATP8A1	4:42627176	.	T/A	.	0.000109194	intron_variant	MODIFIER	.	6.54345e-06	7.17e-06	-6.26551e-07
ATP8A1	4:42627181	.	A/T	.	0.000109194	intron_variant	MODIFIER	.	6.54345e-06	7.17e-06	-6.26551e-07
ATP8A1	4:42578180	rs900769772	G/C	.	0.000109242	intron_variant	MODIFIER	.	6.53727e-06	7.17e-06	-6.32731e-07
ATP8A1	4:42444510	.	G/C	.	0.000218245	intron_variant	MODIFIER	.	6.53146e-06	7.17e-06	-6.38544e-07
ATP8A1	4:42422971	rs186434689	G/C	.	0.000220459	intron_variant	MODIFIER	.	6.52549e-06	7.17e-06	-6.44507e-07
ATP8A1	4:42569242	rs369487612	C/A	.	0.000109123	intron_variant	MODIFIER	.	6.52195e-06	7.17e-06	-6.48054e-07
ATP8A1	4:42446574	rs77789461	T/C	.	0.000327368	intron_variant	MODIFIER	.	6.4992e-06	7.17e-06	-6.70799e-07
ATP8A1	4:42543942	rs201550968	C/T	K/R	0.000218245	missense_variant	MODERATE	benign(0.02)	6.49736e-06	7.17e-06	-6.72644e-07
ATP8A1	4:42464783	.	G/A	N	0.000109123	synonymous_variant	LOW	.	6.49677e-06	7.17e-06	-6.73226e-07
ATP8A1	4:42590727	rs28756164	T/C	.	0.000327368	intron_variant	MODIFIER	.	6.48845e-06	7.17e-06	-6.81547e-07
ATP8A1	4:42555895	rs187331495	C/T	.	0.000218293	intron_variant	MODIFIER	.	6.48121e-06	7.17e-06	-6.88786e-07
ATP8A1	4:42600589	.	A/C	.	0.002407	intron_variant	MODIFIER	.	6.47555e-06	7.17e-06	-6.94448e-07
ATP8A1	4:42586253	rs539031472	T/C	.	0.000437063	intron_variant	MODIFIER	.	6.47321e-06	7.17e-06	-6.96794e-07
ATP8A1	4:42586564	rs193216438	G/A	.	0.000109963	intron_variant	MODIFIER	.	6.46197e-06	7.17e-06	-7.08026e-07
ATP8A1	4:42574629	rs61755862	T/C	V/I	0.000872981	missense_variant	MODERATE	benign(0)	6.45839e-06	7.17e-06	-7.11611e-07
ATP8A1	4:42579731	rs932586780	T/C	.	0.000218245	intron_variant	MODIFIER	.	6.44763e-06	7.17e-06	-7.22371e-07
ATP8A1	4:42590756	rs150214116	T/C	.	0.00141859	intron_variant	MODIFIER	.	6.44207e-06	7.17e-06	-7.27933e-07
ATP8A1	4:42656796	rs374731050	T/G	.	0.000327368	intron_variant	MODIFIER	.	6.4332e-06	7.17e-06	-7.36804e-07
ATP8A1	4:42423623	rs774990376	C/T	Y/C	0.000109123	missense_variant	MODERATE	benign(0.005)	6.43097e-06	7.17e-06	-7.39027e-07
ATP8A1	4:42624444	rs553837218	A/G	.	0.000327797	intron_variant	MODIFIER	.	6.42682e-06	7.17e-06	-7.43177e-07
ATP8A1	4:42586563	rs763870943	G/T	.	0.000439174	intron_variant	MODIFIER	.	6.41208e-06	7.17e-06	-7.57924e-07
ATP8A1	4:42579993	.	G/A	.	0.000109123	intron_variant	MODIFIER	.	6.40997e-06	7.17e-06	-7.60026e-07
ATP8A1	4:42455237	.	A/T	.	0.000109123	intron_variant	MODIFIER	.	6.40997e-06	7.17e-06	-7.60027e-07
ATP8A1	4:42574528	.	C/T	.	0.000436491	intron_variant	MODIFIER	.	6.40989e-06	7.17e-06	-7.6011e-07
ATP8A1	4:42443481	rs1015941842	G/A	.	0.000327368	intron_variant	MODIFIER	.	6.40951e-06	7.17e-06	-7.60489e-07
ATP8A1	4:42581806	.	T/C	.	0.000327511	intron_variant	MODIFIER	.	6.40859e-06	7.17e-06	-7.61415e-07
ATP8A1	4:42485428	rs145718590	A/G	.	0.000327869	intron_variant	MODIFIER	.	6.40724e-06	7.17e-06	-7.62759e-07
ATP8A1	4:42446725	rs139526135	T/C	.	0.00622815	intron_variant	MODIFIER	.	6.39876e-06	7.17e-06	-7.71238e-07
ATP8A1	4:42590944	rs562638733	A/AAAAC	.	0.000547166	intron_variant	MODIFIER	.	6.37728e-06	7.17e-06	-7.92716e-07
ATP8A1	4:42552455	rs200548856	C/T	.	0.00174596	intron_variant	MODIFIER	.	6.36639e-06	7.17e-06	-8.03605e-07
ATP8A1	4:42615980	rs375454343	C/T	.	0.000327439	intron_variant	MODIFIER	.	6.3605e-06	7.17e-06	-8.095e-07
ATP8A1	4:42656753	rs577269094	G/A	.	0.000545613	intron_variant	MODIFIER	.	6.35576e-06	7.17e-06	-8.14241e-07
ATP8A1	4:42616037	rs866402689	T/C	T	0.000109123	synonymous_variant	LOW	.	6.34743e-06	7.17e-06	-8.22569e-07
ATP8A1	4:42485597	.	G/A	A	0.000218245	synonymous_variant	LOW	.	6.30113e-06	7.17e-06	-8.68874e-07
ATP8A1	4:42485616	rs146595907	T/C	R/Q	0.000327368	missense_variant	MODERATE	benign(0.066)	6.28849e-06	7.17e-06	-8.81505e-07
ATP8A1	4:42446665	rs754087004	C/T	.	0.000218245	intron_variant	MODIFIER	.	6.28708e-06	7.17e-06	-8.82923e-07
ATP8A1	4:42443759	rs1041223684	T/A	.	0.000218866	intron_variant	MODIFIER	.	6.26589e-06	7.17e-06	-9.04113e-07
ATP8A1	4:42455621	rs369685799	G/C	.	0.000218245	intron_variant	MODIFIER	.	6.26304e-06	7.17e-06	-9.06955e-07
ATP8A1	4:42627189	rs996971497	G/A	.	0.000218531	intron_variant	MODIFIER	.	6.25975e-06	7.17e-06	-9.1025e-07
ATP8A1	4:42574748	rs768858070	C/T	.	0.000218293	intron_variant	MODIFIER	.	6.2567e-06	7.17e-06	-9.133e-07
ATP8A1	4:42588338	rs371793167	C/T	.	0.000218245	intron_variant	MODIFIER	.	6.23194e-06	7.17e-06	-9.38061e-07
ATP8A1	4:42586522	.	C/T	.	0.000218436	intron_variant	MODIFIER	.	6.22108e-06	7.17e-06	-9.4892e-07
ATP8A1	4:42549031	rs34999127	C/T	N/S	0.00469227	missense_variant	MODERATE	benign(0.305)	6.21555e-06	7.17e-06	-9.54447e-07
ATP8A1	4:42455426	rs367584032	T/C	.	0.000109123	splice_region_variant&intron_variant	LOW	.	6.21322e-06	7.17e-06	-9.56781e-07
ATP8A1	4:42444524	rs944455721	A/G	.	0.000218245	intron_variant	MODIFIER	.	6.18013e-06	7.17e-06	-9.89871e-07
ATP8A1	4:42551178	rs147842028	T/C	.	0.00174596	intron_variant	MODIFIER	.	6.1716e-06	7.17e-06	-9.984e-07
ATP8A1	4:42443679	.	T/A	.	0.000109123	splice_region_variant&intron_variant	LOW	.	6.16954e-06	7.17e-06	-1.00046e-06
ATP8A1	4:42555916	rs371375152	G/A	.	0.000436491	intron_variant	MODIFIER	.	6.14911e-06	7.17e-06	-1.02089e-06
ATP8A1	4:42412928	rs78469447&COSM6270747&COSM6270746	A/G	P	0.00807508	synonymous_variant	LOW	.	6.14595e-06	7.17e-06	-1.02405e-06
ATP8A1	4:42579885	.	C/G	L/V	0.000218245	missense_variant	MODERATE	possibly_damaging(0.732)	6.08097e-06	7.17e-06	-1.08903e-06
ATP8A1	4:42590905	.	A/T	.	0.00120035	intron_variant	MODIFIER	.	6.04556e-06	7.17e-06	-1.12444e-06
ATP8A1	4:42446567	rs377732240	A/G	.	0.000218245	intron_variant	MODIFIER	.	6.04414e-06	7.17e-06	-1.12586e-06
ATP8A1	4:42413003	rs146513232	T/C	A	0.00643824	synonymous_variant	LOW	.	6.03437e-06	7.17e-06	-1.13563e-06
ATP8A1	4:42590900	rs754384331	A/T	.	0.000545613	intron_variant	MODIFIER	.	6.02598e-06	7.17e-06	-1.14402e-06
ATP8A1	4:42552408	rs556173716	C/A	.	0.00513325	intron_variant	MODIFIER	.	5.98968e-06	7.17e-06	-1.18032e-06
ATP8A1	4:42616063	.	G/C	D/H	0.000218245	missense_variant	MODERATE	probably_damaging(1)	5.98921e-06	7.17e-06	-1.18079e-06
ATP8A1	4:42569300	.	T/G	.	0.000109123	intron_variant	MODIFIER	.	5.5475e-06	7.17e-06	-1.6225e-06
ATP8A1	4:42578444	rs41265699	A/C	.	0.0333915	intron_variant	MODIFIER	.	5.36513e-06	7.17e-06	-1.80487e-06
ATP8A1	4:42578411	rs41265697	A/G	.	0.0328531	intron_variant	MODIFIER	.	5.34697e-06	7.17e-06	-1.82303e-06
ATP8A1	4:42625788	.	A/C	.	0.00252636	intron_variant	MODIFIER	.	5.19993e-06	7.17e-06	-1.97007e-06
ATP8A1	4:42569296	.	G/A	.	0.000218245	intron_variant	MODIFIER	.	5.19009e-06	7.17e-06	-1.97991e-06
ATP8A1	4:42569298	.	T/A	.	0.000218245	intron_variant	MODIFIER	.	5.19009e-06	7.17e-06	-1.97991e-06
ATP8A1	4:42625798	.	T/A	.	0.000327726	intron_variant	MODIFIER	.	3.48059e-06	7.17e-06	-3.68941e-06
ATP8A1	4:42625787	.	A/AAC	.	0.000218341	intron_variant	MODIFIER	.	3.29657e-06	7.17e-06	-3.87343e-06
ATP8A1	4:42625791	.	T/TATA	.	0.000218388	intron_variant	MODIFIER	.	3.29636e-06	7.17e-06	-3.87364e-06

## Sheet: Table10 - Variants in COSMIC
Supplementary Table 10. All loci that were found in COSMIC database
Gene	chrpos	Existing_variation	alt_ref	Amino_acids	MAF	Consequence	IMPACT	PolyPhen	Prm	Porig	Prm - Porig
RBM12	20:35652667	rs747020729&COSM5039294	T/C	.	0.00010912	intron_variant	MODIFIER	.	3.53e-07	6.82e-08	2.848e-07
RBM12	20:35654342	COSM4634519	C/G	.	0.00010912	upstream_gene_variant	MODIFIER	.	6.46e-08	6.82e-08	-3.6e-09
RBM12	20:35652624	COSM1026269	T/G	.	0.00010912	intron_variant	MODIFIER	.	6.29e-08	6.82e-08	-5.3e-09
NDUFB6	9:32553884	rs200492335&COSM6306013	A/G	H/Y	0.00054561	missense_variant	MODERATE	possibly_damaging(0.841)	1.03e-07	1.31e-07	-2.8e-08
DLGAP4-AS1	20:36525992	rs971669684&COSM5601362&COSM5601361	A/C	P/T	0.00065474	missense_variant	MODERATE	possibly_damaging(0.473)	0.00071144	3.86e-07	0.000711054
DLGAP4-AS1	20:36548162	rs7273824&COSM3693464	T/C	N	0.00010912	synonymous_variant	LOW	.	1.41e-06	3.86e-07	1.024e-06
DLGAP4-AS1	20:36526879	rs114982034&COSM4098029&COSM4098028	A/G	D/N	0.00010912	missense_variant	MODERATE	probably_damaging(0.988)	9.97e-07	3.86e-07	6.11e-07
DLGAP4-AS1	20:36526877	rs757785334&COSM1172717	A/G	R/H	0.00010912	missense_variant	MODERATE	probably_damaging(0.998)	3.78e-07	3.86e-07	-8e-09
DLGAP4-AS1	20:36548163	rs573813643&COSM6250954	A/G	A/T	0.00010912	missense_variant	MODERATE	benign(0.235)	3.75e-07	3.86e-07	-1.1e-08
DLGAP4-AS1	20:36525943	rs147941086&COSM1592595&COSM1026373	T/C	F	0.00010912	synonymous_variant	LOW	.	3.65e-07	3.86e-07	-2.1e-08
DLGAP4-AS1	20:36525922	rs772584861&COSM723867&COSM1647392	T/C	I	0.00010912	synonymous_variant	LOW	.	3.6e-07	3.86e-07	-2.6e-08
DLGAP4-AS1	20:36524317	rs772350950&COSM1238684	T/C	F	0.00043649	synonymous_variant	LOW	.	3.33e-07	3.86e-07	-5.3e-08
DLGAP4-AS1	20:36525869	rs769094888&COSM6370053&COSM6370052&COSM3840896&COSM3840895	T/C	R/C	0.00021825	missense_variant	MODERATE	benign(0.171)	3.2e-07	3.86e-07	-6.6e-08
DLGAP4-AS1	20:36548078	rs533129900&COSM3545872	T/C	A	0.00021825	synonymous_variant	LOW	.	1.37e-07	3.86e-07	-2.49e-07
ATP6V1A	3:113795187	rs771311957&COSM4583806&COSM1036559	C/T	S	0.00021825	synonymous_variant	LOW	.	1.11e-06	5e-07	6.1e-07
ATP6V1A	3:113805469	COSM4930959	G/A	I/V	0.00010912	missense_variant	MODERATE	benign(0)	4.7e-07	5e-07	-3e-08
ATP6V1A	3:113795130	rs778910556&COSM5037373	A/G	S	0.00010912	synonymous_variant	LOW	.	4.65e-07	5e-07	-3.5e-08
ATP6V1A	3:113798368	rs753550267&COSM177264	T/C	F	0.00021825	synonymous_variant	LOW	.	4.51e-07	5e-07	-4.9e-08
ATP6V1A	3:113784333	rs145564764&COSM309371&COSM1036554	A/G	S	0.00032737	synonymous_variant	LOW	.	4.32e-07	5e-07	-6.8e-08
RECK	9:36083487	rs754745207&COSM1177811	A/G	A/T	0.00010912	missense_variant	MODERATE	benign(0.178)	3.15e-06	1.86e-06	1.29e-06
RECK	9:36110029	rs772507584&COSM1462342	C/G	R/P	0.00010912	missense_variant	MODERATE	probably_damaging(0.916)	2.3e-06	1.86e-06	4.4e-07
RECK	9:36118835	COSM284531	T/C	R/C	0.00010912	missense_variant	MODERATE	probably_damaging(0.995)	1.82e-06	1.86e-06	-4e-08
RECK	9:36118758	COSM3657323	A/C	P/H	0.00010915	missense_variant&splice_region_variant	MODERATE	benign(0.19)	1.8e-06	1.86e-06	-6e-08
RECK	9:36122955	rs769615023&COSM6183747	A/G	S	0.00010912	synonymous_variant	LOW	.	1.77e-06	1.86e-06	-9e-08
RECK	9:36037055	rs559955662&COSM5359116	C/G	A	0.00021834	synonymous_variant	LOW	.	1.76e-06	1.86e-06	-1e-07
RECK	9:36083502	rs769726835&COSM1674497	T/C	Q/*	0.00021825	stop_gained	HIGH	.	1.75e-06	1.86e-06	-1.1e-07
RECK	9:36117066	rs183480403&COSM3926792	T/C	L	0.00032737	synonymous_variant	LOW	.	1.74e-06	1.86e-06	-1.2e-07
RECK	9:36118966	COSM4720941	A/G	P	0.00010912	splice_region_variant&synonymous_variant	LOW	.	1.72e-06	1.86e-06	-1.4e-07
RECK	9:36117042	COSM6275458	C/G	Q/H	0.00021825	missense_variant	MODERATE	probably_damaging(0.956)	1.71e-06	1.86e-06	-1.5e-07
RECK	9:36091260	rs3736884&COSM150606	T/C	S	0.00065474	synonymous_variant	LOW	.	1.61e-06	1.86e-06	-2.5e-07
SLC35E1	19:16553901	rs773244448&COSM1391284&COSM1391283	A/G	Y	0.00021825	synonymous_variant	LOW	.	3.49e-06	2.11e-06	1.38e-06
SLC35E1	19:16568029	rs372635795&COSM6036944&COSM6036943&COSM6036942	C/T	.	0.00010912	splice_region_variant&intron_variant	LOW	.	2e-06	2.11e-06	-1.1e-07
SLC35E1	19:16568056	rs542109613&COSM4783070&COSM1391290&COSM1391289	T/C	S	0.00021825	synonymous_variant	LOW	.	1.29e-06	2.11e-06	-8.2e-07
SLC35E1	19:16553833	rs200335570&COSM293428	T/C	R/H	0.00010912	missense_variant	MODERATE	benign(0)	1.19e-06	2.11e-06	-9.2e-07
RFX3	9:3247951	rs2229356&COSM3763880	T/C	.	0.00250982	intron_variant	MODIFIER	.	6.99e-06	2.23e-06	4.76e-06
RFX3	9:3225071	rs996213173&COSM323044	T/C	A/T	0.00010912	missense_variant	MODERATE	benign(0)	2.07e-06	2.23e-06	-1.6e-07
RFX3	9:3225114	rs757220727&COSM178631	A/G	S	0.00010912	synonymous_variant	LOW	.	2.06e-06	2.23e-06	-1.7e-07
RFX3	9:3247930	COSM40548	A/G	.	0.00010912	intron_variant	MODIFIER	.	2.05e-06	2.23e-06	-1.8e-07
RFX3	9:3330505	rs562377422&COSM4858515&COSM4858516&COSM753611&COSM753612	T/C	T	0.00021825	synonymous_variant	LOW	.	2.05e-06	2.23e-06	-1.8e-07
RFX3	9:3270471	COSM1461993&COSM1461994	A/G	C	0.00021825	synonymous_variant	LOW	.	1.98e-06	2.23e-06	-2.5e-07
RFX3	9:3248111	COSM3906807&COSM3906808&COSM3906809	C/T	Y/C	0.00010912	missense_variant	MODERATE	benign(0.354)	1.98e-06	2.23e-06	-2.5e-07
RFX3	9:3225104	rs137899630&COSM3413586	T/C	V/I	0.00120035	missense_variant	MODERATE	benign(0.015)	1.85e-06	2.23e-06	-3.8e-07
ATP8A1	4:42485617	rs370223580&COSM1184146&COSM1184145	A/G	R/W	0.00010912	missense_variant	MODERATE	possibly_damaging(0.788)	1.31e-05	7.17e-06	5.93e-06
ATP8A1	4:42586383	COSM3603994&COSM3603993	T/C	D/N	0.00010915	missense_variant	MODERATE	benign(0.037)	1.16e-05	7.17e-06	4.43e-06
ATP8A1	4:42443590	rs140420171&COSM1184148&COSM1184147	A/G	P/L	0.00043649	missense_variant	MODERATE	benign(0.284)	7.61e-06	7.17e-06	4.4e-07
ATP8A1	4:42522187	rs770450885&COSM4124792&COSM4124791	C/G	L	0.00010912	synonymous_variant	LOW	.	6.89e-06	7.17e-06	-2.8e-07
ATP8A1	4:42543936	rs147389955&COSM299073&COSM299072	T/C	R/Q	0.00010912	missense_variant	MODERATE	possibly_damaging(0.862)	6.75e-06	7.17e-06	-4.2e-07
ATP8A1	4:42443642	rs754952867&COSM1184144&COSM1184143	T/C	A/T	0.00010912	missense_variant	MODERATE	benign(0.03)	6.68e-06	7.17e-06	-4.9e-07
ATP8A1	4:42575654	rs774297193&COSM5527169&COSM5527168	A/G	R/*	0.00010912	stop_gained	HIGH	.	6.6e-06	7.17e-06	-5.7e-07
ATP8A1	4:42412928	rs78469447&COSM6270747&COSM6270746	A/G	P	0.00807508	synonymous_variant	LOW	.	6.15e-06	7.17e-06	-1.02e-06
